# Supplementary material for: Genetic determinants facilitating the evolution of resistance to carbapenem antibiotics
Source: eLife journal article supplement (doi:10.7554/elife.67310), 2021-04-19

**A** Figure 5-figure supplement 4  
**MEM treatment**

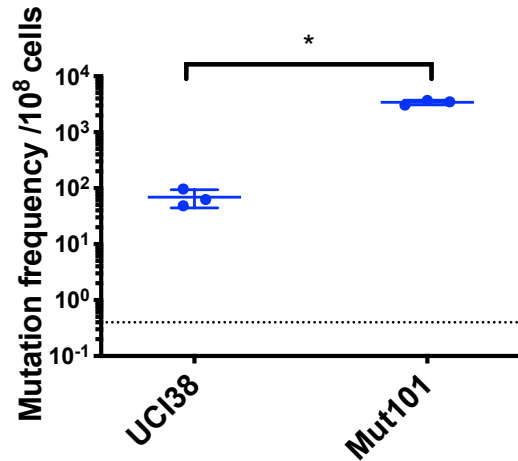

**B** Conjugation of *bla*<sub>KPC-2</sub> from a clinical isolate

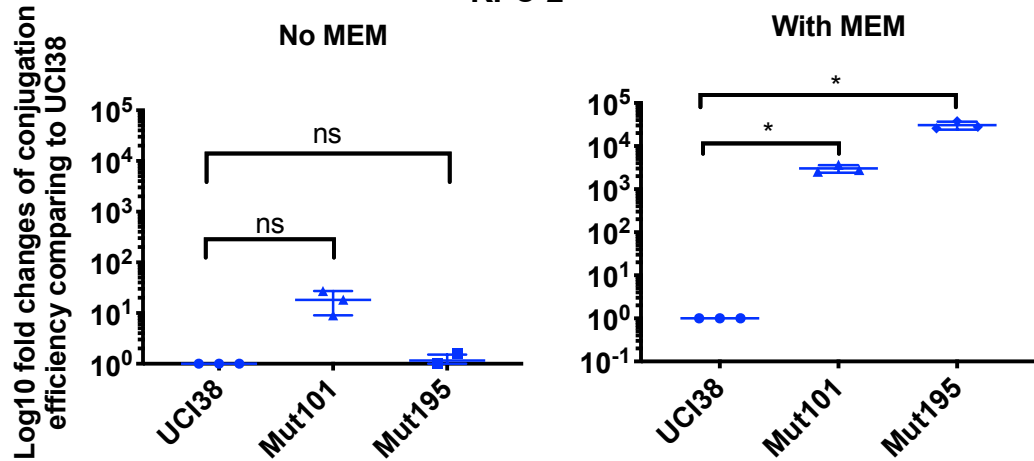

Supplement: supp [file elife-67310-supp-v1.zip]
