# Supplementary material for: Genetic determinants facilitating the evolution of resistance to carbapenem antibiotics
Source: eLife journal article supplement (doi:10.7554/elife.67310), 2021-04-19
Supplement: supp [file elife-67310-supp-v1.zip]

Archive with 24 entries (24 files):
- elife_poa_e67310_Transparent_Reporting_File.docx
- elife_poa_e67310_Figure_2_figure_supplement_1.pdf
- elife_poa_e67310_Figure_3_figure_supplement_1.pdf
- elife_poa_e67310_Figure_4_figure_supplement_1.pdf
- elife_poa_e67310_Figure_4_figure_supplement_2.pdf
- elife_poa_e67310_Figure_4_figure_supplement_3.pdf
- elife_poa_e67310_Figure_4_figure_supplement_4.pdf
- elife_poa_e67310_Figure_5_figure_supplement_1.pdf
- elife_poa_e67310_Figure_5_figure_supplement_2.pdf
- elife_poa_e67310_Figure_5_figure_supplement_3.pdf
- elife_poa_e67310_Figure_5_figure_supplement_4.pdf
- elife_poa_e67310_Supplementary_file_1.xlsx
- elife_poa_e67310_Supplementary_file_2.xlsx
- elife_poa_e67310_Supplementary_file_3.xlsx
- elife_poa_e67310_Supplementary_file_4.xlsx
- elife_poa_e67310_Supplementary_file_5.xlsx
- elife_poa_e67310_Supplementary_file_6.xlsx
- elife_poa_e67310_Supplementary_file_7.xlsx
- elife_poa_e67310_Supplementary_file_8.xlsx
- elife_poa_e67310_Supplementary_file_9.xlsx
- elife_poa_e67310_Supplementary_file_10.xlsx
- elife_poa_e67310_Supplementary_file_11.xlsx
- elife_poa_e67310_Supplementary_file_12.xlsx
- elife_poa_e67310_Supplementary_file_13.xlsx
