# Supplementary material for: Genetic determinants facilitating the evolution of resistance to carbapenem antibiotics
Source: eLife journal article supplement (doi:10.7554/elife.67310), 2021-04-19
Supplement: supp [file elife-67310-supp-v1.zip › elife_poa_e67310_Figure_4_figure_supplement_2.pdf]

Figure 4-figure supplement 2

Inoculate ~100 cells  
(log phase) per well

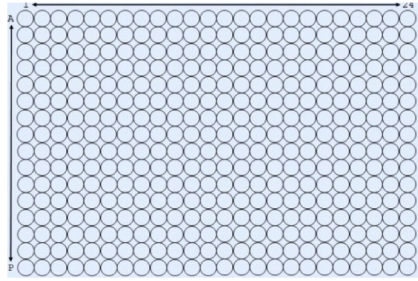

Susceptible  
ancestors

Incubate  
for 3 hours

Add carbapenems

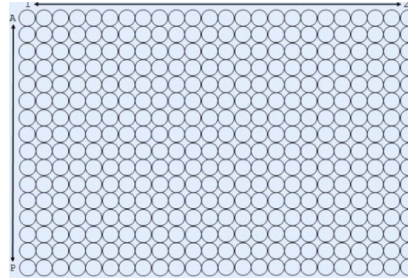

Quantify cell number in 3  
selected wells by plating

Incubate  
overnight

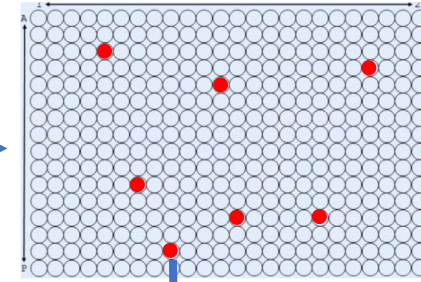

Read OD<sub>600</sub>,  
quantify  
mutation  
frequencies

PCR *ompK36* locus  
including promoter  
region in mutants

Quantify percentage  
of mutants with TN  
insertions as relative  
transposition rates

Sanger  
sequencing

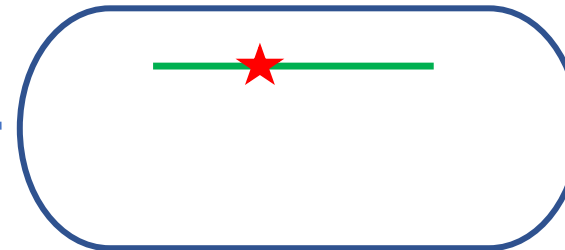

Mutant A with  
point mutation  
on *ompK36*

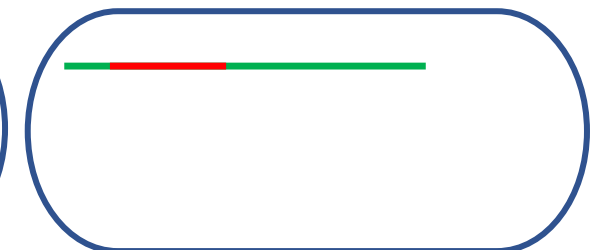

Mutant B with TN  
insertion on  
*ompK36*
