# Supplementary material for: Genetic determinants facilitating the evolution of resistance to carbapenem antibiotics
Source: eLife journal article supplement (doi:10.7554/elife.67310), 2021-04-19
Supplement: supp [file elife-67310-supp-v1.zip › elife_poa_e67310_Supplementary_file_1.xlsx]

## Sheet: Supplmentary file 1
Supplementary file 1. Bacterial strains and plasmids used in this study
Strains	ST	MIC (µg/ml) of						Narrow-spectrum ß-lactamase	ESBL	ompK36	Strain description	Reference
		ETP	MEM	IMP	DOR	FAR	RIF
UCI38	ST258	0.25	0.06	0.13	0.06	2	16	none	blaSHV-12	intact	A K. pneumoniae clinical isolate	GCA_000566805.1
MGH222	ST15	0.03	0.03	nd	nd	2	16	none	blaSHV-28	intact	A K. pneumoniae clinical isolate	GCA_014902955.1
UCICRE126	ST147	0.03	0.25	nd	nd	1	16	blaSHV-11	none	intact	A K. pneumoniae clinical isolate	GCA_014902315.1
MGH66	ST29	0.06	0.03	nd	nd	1	16	blaSHV-187	none	intact	A K. pneumoniae clinical isolate	GCA_000694555.1
MGH74	ST76	0.03	0.06	nd	nd	2	16	blaSHV-1	none	intact	A K. pneumoniae clinical isolate	GCA_000694715.1
MGH158	ST152	0.03	0.06	nd	nd	2	16	blaSHV-1	none	intact	A K. pneumoniae clinical isolate	GCA_002152555.1
MGH21	ST111	0.03	0.03	0.25	0.13	0.5	16	blaSHV-11	none	intact	A K. pneumoniae clinical isolate	GCA_000492915.1
MGH32	ST111	0.03	0.03	0.25	0.13	0.5	16	none	none	intact	A K. pneumoniae clinical isolate in which the native blaSHV-1 was inactivated by a point mutation (Leu88STP)	GCA_000493075.1
UCI43	ST258	1	0.06	nd	nd	nd	16	blaTEM-1	blaSHV-12	intact	A K. pneumoniae clinical isolate	GCA_000566745.1
UCI22	ST258	0.25	0.03	0.13	0.03	0.5	16	none	blaSHV-12	intact	A K. pneumoniae clinical isolate	GCA_000566925.1
UCI44	ST258	1	0.06	nd	nd	nd	16	blaTEM-1	blaSHV-12	intact	A K. pneumoniae clinical isolate	GCA_000566725.1
UCI34	ST34	0.06	0.03	nd	nd	nd	16	blaSHV-26	none	intact	A K. pneumoniae clinical isolate	GCA_000566845.1
MGH30	ST37	0.06	0.03	nd	nd	nd	16	blaSHV-11	none	intact	A K. pneumoniae clinical isolate	GCA_000492935.1
BIDMC40	ST34	0.06	0.03	nd	nd	nd	16	blaSHV-26	none	intact	A K. pneumoniae clinical isolate	GCA_000492215.1
UCI64	ST17	0.03	0.03	nd	nd	nd	16	blaSHV-11	none	intact	A K. pneumoniae clinical isolate	GCA_000688175.1
BIDMC41	ST37	2	0.06	nd	nd	nd	16	blaTEM-1	blaSHV-12	intact	A K. pneumoniae clinical isolate	GCA_000492195.1
BWH41	ST258	1	0.25	0.5	0.13	8	16	blaSHV-11	none	truncated	A K. pneumoniae clinical isolate	GCA_000567545.1
MGH21SHV	ST111	1	0.13	0.25	0.13	2	nd	blaSHV-11	blaSHV-12	intact	MGH21(pSHV), MGH21 expressing blaSHV-12	This study
MGH21∆cas	ST111	0.03	0.03	0.25	0.13	0.5	nd	blaSHV-11	none	intact	MGH21 in which the operon encoding the CRISPR-Cas system was deleted	This study
MGH21∆cas(pESBL)	ST111	0.06	0.06	nd	nd	1	nd	blaSHV-11	none	intact	MGH21Δcas carrying pESBL isolated from UCI38	This study
MGH21∆cas(pCas)	ST111	0.03	0.03	nd	nd	nd	nd	blaSHV-11	none	intact	MGH21Δcas expressing CRISPR-Cas system through 2 lab constructs	This study
MGH21∆cas(pVector)	ST111	0.03	0.03	nd	nd	nd	nd	blaSHV-11	none	Intact	MGH21Δcas carrying two empty vectors	This study
E. coli 10ß	NA	nd	nd	nd	nd	nd	nd	None	none	Intact	E. coli strain from NEB	NEB
Mut34	ST258	2	0.06	nd	nd	4	nd	none	blaSHV-12	intact	Mutant of UCI38 from ertapenem treatment, with the blaSHV-12 duplication	This study
Mut101	ST258	2	0.06	nd	nd	4	nd	none	blaSHV-12	down-regulated	Mutant of UCI38 from faropenem treatment, ompK36 is down-regulated due to the inactivation of rseA	This study
Mut186	ST258	8	1	nd	nd	8	nd	none	blaSHV-12	inactivated	Mutant of Mut34 from meropenem treatmnt, with both blaSHV-12 duplication and ompK36 inactivation	This study
Mut195	ST258	8	0.25	nd	nd	8	nd	none	blaSHV-12	down-regulated	Mutant of Mut101 from meropenem treatmnt, with both blaSHV-12 duplication and ompK36 down-regulation	This study
UCI38R	ST258	0.25	0.06	nd	nd	2	nd	none	blaSHV-12	intact	Rifampin resistant version of UCI38	This study
Mut34R	ST258	2	0.06	nd	nd	4	nd	none	blaSHV-12	intact	Rifampin resistant version of Mut34	This study
Mut101R	ST258	2	0.06	nd	nd	4	nd	none	blaSHV-12	down-regulated	Rifampin resistant version of Mut101	This study
Mut186R	ST258	8	1	nd	nd	8	nd	none	blaSHV-12	inactivated	Rifampin resistant version of Mut186	This study
Mut195R	ST258	8	0.25	nd	nd	8	nd	none	blaSHV-12	down-regulated	Rifampin resistant version of Mut195	This study
BIDMC45	ST258	>32	16	nd	nd	nd	nd	none	blaSHV-12	intact	A K. pneumoniae clinical isolate carrying blaKPC-2	GCA_000567025
Plasmids	Description											Reference
pSHV	blaSHV-12, including upstream 500 bp, was amplified from UCI38, and blunt ligated into pSmart_LCKN (KanamycinR)											This study
pKOV	The plasmid used for gene knockout though homologous recombination, ChloramphenicolR											Link et al., 1997
pKOV-casKO	A 2-kb DNA fusion containing 1kb upstream and 1 kb downstream of cas operon in MGH21 was ligated into pKOV using BamHI and NotI sites, ChloramphenicolR											This study
pESBL	The plasmid encoding blaSHV-12 extracted from UCI38, CefotaximeR											This study
pBAD33Gm	pBAD33 with Gentamycin resistance, a gentamycin resistance gene was ligated into HindIII cloning site on pBAD33 (GentamycinR, ChloramphenicolR)											This study
pBAD33Gm_CasCRISPR1	CasABECD, cas1, cas2 operon, and CRISPR array I was amplified from MGH21, a SD sequence was incorporated upstream of ATG of casA, then this piece of DNA was ligated into KpnI and XbaI sites on pBAD33Gm (GentamycinR, ChloramphenicolR)											This study
pCas3CRISPR2	Cas3 gene, including the upstream 500 bp region and CRISPR array II region, was amplified from MGH21 and ligated into pSmart LC KN, KanamycinR											This study
pBAD33	Cloning vector, ChloramphenicolR											Guzman LM et al. 1995
pSmart LC KN	Cloning vector, KanamycinR											Lucigen
