# Supplementary material for: Genetic determinants facilitating the evolution of resistance to carbapenem antibiotics
Source: eLife journal article supplement (doi:10.7554/elife.67310), 2021-04-19
Supplement: supp [file elife-67310-supp-v1.zip › elife_poa_e67310_Supplementary_file_3.xlsx]

## Sheet: Supplementary file 3
Supplementary file 3. CRISRP-Cas systems and R-M systems in 267 K. pneumoniae
Strain ID	Accession	Species	ST	CRISPR Array	cas1	cas3	Type I RM	Type II RM	Type III RM	meropenem
Kleb_pneu_BIDMC_1_V1	GCF_000567505.1	Klebsiella_pneumoniae	ST-258	NO	NO	NO	NO	NO	YES	NS
Kleb_pneu_BIDMC_10_V1	GCF_000706605.1	Klebsiella_pneumoniae	ST-258	NO	NO	NO	NO	NO	YES	NS
Kleb_pneu_BIDMC_11_V1	GCF_000567405.1	Klebsiella_pneumoniae	ST-14	YES	YES	YES	NO	YES	YES	NS
Kleb_pneu_BIDMC_12A_V1	GCF_000567385.1	Klebsiella_pneumoniae	ST-258	NO	NO	NO	NO	YES	YES	NS
Kleb_pneu_BIDMC_12B_V1	GCF_000567365.1	Klebsiella_pneumoniae	ST-258	NO	NO	NO	NO	YES	YES	NS
Kleb_pneu_BIDMC_12C_V1	GCF_000474885.1	Klebsiella_pneumoniae	ST-258	NO	NO	NO	NO	YES	YES	NS
Kleb_pneu_BIDMC_13_V1	GCF_000567345.1	Klebsiella_pneumoniae	ST-258	NO	NO	NO	NO	NO	YES	NS
Kleb_pneu_BIDMC_14_V1	GCF_000567325.1	Klebsiella_pneumoniae	ST-258	NO	NO	NO	NO	YES	YES	NS
Kleb_pneu_BIDMC_16_V1	GCF_000474905.1	Klebsiella_pneumoniae	ST-258	NO	NO	NO	NO	NO	YES	NS
Kleb_pneu_BIDMC_18A_V1	GCF_000567305.1	Klebsiella_pneumoniae	ST-258	NO	NO	NO	NO	NO	YES	NS
Kleb_pneu_BIDMC_18B_V1	GCF_000692915.1	Klebsiella_pneumoniae	ST-258	NO	NO	NO	NO	NO	YES	NS
Kleb_pneu_BIDMC_18C_V1	GCF_000474865.1	Klebsiella_pneumoniae	ST-258	NO	NO	NO	NO	NO	YES	NS
Kleb_pneu_BIDMC_18D_V1	GCF_000567285.1	Klebsiella_pneumoniae	ST-37	NO	NO	NO	NO	YES	NO	S
Kleb_pneu_BIDMC_21_V1	GCF_000492395.1	Klebsiella_pneumoniae	ST-37	NO	NO	NO	NO	YES	NO	S
Kleb_pneu_BIDMC_22_V1	GCF_000492375.1	Klebsiella_pneumoniae	ST-1189	NO	NO	NO	NO	YES	NO	S
Kleb_pneu_BIDMC_23_V1	GCF_000492355.1	Klebsiella_pneumoniae	ST-111	YES	YES	YES	NO	NO	YES	S
Kleb_pneu_BIDMC_24_V1	GCF_000492335.1	Klebsiella_pneumoniae	ST-797	NO	NO	NO	NO	NO	NO	S
Kleb_pneu_BIDMC_25_V1	GCF_000492315.1	Klebsiella_pneumoniae	ST-186	NO	NO	NO	NO	YES	YES	S
Kleb_pneu_BIDMC_2A_V1	GCF_000567485.1	Klebsiella_pneumoniae	ST-258	NO	NO	NO	NO	NO	YES	NS
Kleb_pneu_BIDMC_31_V1	GCF_000521985.1	Klebsiella_pneumoniae	ST-502	NO	NO	NO	YES	NO	NO	S
Kleb_pneu_BIDMC_32_V1	GCF_000567265.1	Klebsiella_pneumoniae	ST-258	NO	NO	NO	NO	YES	YES	NS
Kleb_pneu_BIDMC_33B_V1	GCF_000707985.1	Klebsiella_pneumoniae	ST-15	YES	YES	YES	YES	YES	NO	NS
Kleb_pneu_BIDMC_34_V1	GCF_000567245.1	Klebsiella_pneumoniae	ST-258	NO	NO	NO	NO	NO	YES	NS
Kleb_pneu_BIDMC_35_V1	GCF_000567225.2	Klebsiella_pneumoniae	ST-17	NO	NO	NO	YES	NO	NO	NS
Kleb_pneu_BIDMC_36_V1	GCF_000492295.1	Klebsiella_pneumoniae	ST-661	NO	NO	NO	YES	NO	NO	S
Kleb_pneu_BIDMC_4_V1	GCF_000567465.1	Klebsiella_pneumoniae	ST-258	NO	NO	NO	NO	NO	YES	NS
Kleb_pneu_BIDMC_40_V1	GCF_000492215.1	Klebsiella_pneumoniae	ST-34	YES	YES	YES	YES	YES	YES	S
Kleb_pneu_BIDMC_41_V1	GCF_000492195.1	Klebsiella_pneumoniae	ST-37	NO	NO	NO	NO	YES	NO	S
Kleb_pneu_BIDMC_42a_V1	GCF_000567205.1	Klebsiella_pneumoniae	ST-258	NO	NO	NO	NO	NO	YES	NS
Kleb_pneu_BIDMC_42b_V1	GCF_000567185.1	Klebsiella_pneumoniae	ST-258	NO	NO	NO	NO	NO	YES	NS
Kleb_pneu_BIDMC_45_V1	GCF_000567025.1	Klebsiella_pneumoniae	ST-258	NO	NO	NO	NO	NO	YES	NS
Kleb_pneu_BIDMC_46a_V1	GCF_000567165.1	Klebsiella_pneumoniae	ST-37	NO	NO	NO	YES	YES	NO	NS
Kleb_pneu_BIDMC_46b_V1	GCF_000567145.1	Klebsiella_pneumoniae	ST-372	NO	NO	NO	NO	NO	NO	S
Kleb_pneu_BIDMC_47_V1	GCF_000567125.1	Klebsiella_pneumoniae	ST-540	NO	NO	NO	NO	YES	NO	S
Kleb_pneu_BIDMC_48_V1	GCF_000567105.1	Klebsiella_pneumoniae	ST-37	NO	NO	NO	YES	YES	NO	S
Kleb_pneu_BIDMC_5_V1	GCF_000567445.1	Klebsiella_pneumoniae	ST-258	NO	NO	NO	NO	NO	YES	NS
Kleb_pneu_BIDMC_51_V1	GCF_000567085.1	Klebsiella_pneumoniae	ST-36	NO	NO	NO	NO	YES	NO	S
Kleb_pneu_BIDMC_52_V1	GCF_000567065.1	Klebsiella_pneumoniae	ST-628	NO	NO	NO	NO	NO	NO	S
Kleb_pneu_BIDMC_53_V1	GCF_000567045.1	Klebsiella_pneumoniae	ST-37	NO	NO	NO	YES	YES	NO	NS
Kleb_pneu_BIDMC_54_V1	GCF_000692935.1	Klebsiella_pneumoniae	ST-258	NO	NO	NO	NO	NO	YES	NS
Kleb_pneu_BIDMC_55_V1	GCF_000692955.1	Klebsiella_pneumoniae	ST-105	NO	NO	NO	YES	NO	NO	S
Kleb_pneu_BIDMC_60_V1	GCF_000692975.1	Klebsiella_pneumoniae	ST-258	NO	NO	NO	YES	NO	YES	NS
Kleb_pneu_BIDMC_68_V1	GCF_000693015.1	Klebsiella_pneumoniae	ST-258	NO	NO	NO	YES	NO	YES	NS
Kleb_pneu_BIDMC_69_V1	GCF_000693035.1	Klebsiella_pneumoniae	ST-17	NO	NO	NO	YES	NO	NO	S
Kleb_pneu_BIDMC_7A_V1	GCF_000567825.1	Klebsiella_pneumoniae	ST-258	NO	NO	NO	NO	NO	YES	NS
Kleb_pneu_BIDMC_7B_V1	GCF_000567425.1	Klebsiella_pneumoniae	ST-258	NO	NO	NO	NO	NO	YES	NS
Kleb_pneu_BIDMC122	GCA_014903975.1	Klebsiella_pneumoniae	ST-495	NO	NO	NO	NO	NO	NO	NS
Kleb_pneu_BIDMC123	GCA_014903955.1	Klebsiella_pneumoniae	ST-15	YES	YES	YES	YES	YES	NO	NS
Kleb_pneu_BIDMC124	GCA_014903895.1	Klebsiella_pneumoniae	ST-15	YES	YES	YES	YES	YES	NO	NS
Kleb_pneu_BIDMC85_V1	GCF_001033995.1	Klebsiella_pneumoniae	ST-23	YES	YES	YES	YES	YES	NO	S
Kleb_pneu_BIDMC86_V1	GCF_001034005.1	Klebsiella_pneumoniae	ST-23	YES	YES	YES	NO	YES	NO	S
Kleb_pneu_BIDMC89_V1	GCF_001034055.1	Klebsiella_pneumoniae	ST-17	NO	NO	NO	YES	YES	NO	NS
Kleb_pneu_BIDMC91_V1	GCF_001034085.1	Klebsiella_pneumoniae	ST-16	NO	NO	NO	YES	YES	NO	NS
Kleb_pneu_BIDMC96_V1	GCF_001034135.1	Klebsiella_pneumoniae	ST-927	NO	NO	NO	YES	YES	NO	S
Kleb_pneu_BWH_15_V1	GCF_000567605.1	Klebsiella_pneumoniae	ST-113	YES	YES	YES	YES	YES	NO	NS
Kleb_pneu_BWH_2_V1	GCF_000567625.1	Klebsiella_pneumoniae	ST-101	NO	NO	NO	NO	YES	NO	NS
Kleb_pneu_BWH_22_V1	GCF_000567585.1	Klebsiella_pneumoniae	ST-258	NO	NO	NO	NO	NO	YES	NS
Kleb_pneu_BWH_28_V1	GCF_000492735.1	Klebsiella_pneumoniae	ST-133	NO	NO	NO	NO	YES	NO	S
Kleb_pneu_BWH_30_V1	GCF_000492695.1	Klebsiella_pneumoniae	ST-1164	NO	NO	NO	NO	YES	NO	S
Kleb_pneu_BWH_36_V1	GCF_000567565.1	Klebsiella_pneumoniae	ST-258	NO	NO	NO	NO	NO	YES	NS
Kleb_pneu_BWH_41_V1	GCF_000567545.1	Klebsiella_pneumoniae	ST-258	NO	NO	NO	NO	NO	YES	S
Kleb_pneu_BWH_45_V1	GCF_000693055.1	Klebsiella_pneumoniae	ST-258	NO	NO	NO	NO	NO	YES	NS
Kleb_pneu_BWH_46_V1	GCF_000693075.1	Klebsiella_pneumoniae	ST-592	YES	YES	YES	NO	NO	NO	S
Kleb_pneu_BWH_47_V1	GCF_000693095.1	Klebsiella_pneumoniae	ST-258	NO	NO	NO	NO	YES	YES	NS
Kleb_pneu_BWH_48_V1	GCF_000693115.1	Klebsiella_pneumoniae	ST-17	NO	NO	NO	NO	YES	NO	S
Kleb_pneu_BWH_78	GCA_014903755.1	Klebsiella_pneumoniae	ST-1017	NO	NO	NO	NO	YES	NO	NS
Kleb_pneu_BWH53_V1	GCF_001033385.1	Klebsiella_pneumoniae	ST-258	NO	NO	NO	NO	YES	YES	NS
Kleb_pneu_BWH58_V1	GCF_001033415.1	Klebsiella_pneumoniae	ST-16	NO	NO	NO	YES	NO	NO	NS
Kleb_pneu_BWH62_V1	GCF_001033445.1	Klebsiella_pneumoniae	ST-25	NO	NO	NO	NO	NO	NO	S
Kleb_pneu_BWH66_V1	GCF_002152355.1	Klebsiella_pneumoniae	ST-16	NO	NO	NO	YES	NO	NO	NS
Kleb_pneu_BWH67_V1	GCF_002152365.1	Klebsiella_pneumoniae	ST-251	NO	NO	NO	NO	YES	NO	S
Kleb_pneu_MGH_17_V1	GCF_000493155.1	Klebsiella_pneumoniae	ST-134	YES	YES	YES	NO	NO	NO	S
Kleb_pneu_MGH_18_V1	GCF_000493135.1	Klebsiella_pneumoniae	ST-20	NO	NO	NO	NO	YES	NO	S
Kleb_pneu_MGH_19_V1	GCF_000493115.1	Klebsiella_pneumoniae	ST-988	NO	NO	NO	NO	YES	NO	S
Kleb_pneu_MGH_21_V1	GCF_000493075.1	Klebsiella_pneumoniae	ST-111	YES	YES	YES	NO	NO	NO	S
Kleb_pneu_MGH_29_V1	GCF_000567785.1	Klebsiella_pneumoniae	ST-258	NO	NO	NO	NO	NO	YES	NS
Kleb_pneu_MGH_30_V1	GCF_000492935.1	Klebsiella_pneumoniae	ST-37	NO	NO	NO	YES	NO	NO	S
Kleb_pneu_MGH_31_V1	GCF_000567765.2	Klebsiella_pneumoniae	ST-258	NO	NO	NO	NO	NO	YES	NS
Kleb_pneu_MGH_32_V1	GCF_000492915.1	Klebsiella_pneumoniae	ST-111	YES	YES	YES	NO	NO	NO	S
Kleb_pneu_MGH_35_V1	GCF_000567745.1	Klebsiella_pneumoniae	ST-392	YES	YES	YES	YES	YES	NO	NS
Kleb_pneu_MGH_36_V1	GCF_000492875.1	Klebsiella_pneumoniae	ST-466	YES	YES	YES	NO	NO	NO	S
Kleb_pneu_MGH_39_V1	GCF_000567725.1	Klebsiella_pneumoniae	ST-1138	NO	NO	NO	NO	NO	NO	NS
Kleb_pneu_MGH_43_V1	GCF_000567685.1	Klebsiella_pneumoniae	ST-307	NO	NO	NO	YES	YES	NO	NS
Kleb_pneu_MGH_45_V1	GCF_000567665.1	Klebsiella_pneumoniae	ST-1084	NO	NO	NO	NO	NO	YES	NS
Kleb_pneu_MGH_46_V1	GCF_000492775.1	Klebsiella_pneumoniae	ST-14	YES	YES	YES	NO	NO	NO	S
Kleb_pneu_MGH_47_V1	GCF_000567645.1	Klebsiella_pneumoniae	ST-37	NO	NO	NO	NO	YES	NO	NS
Kleb_pneu_MGH_48_V1	GCF_000492755.1	Klebsiella_pneumoniae	ST-189	YES	YES	YES	YES	NO	NO	S
Kleb_pneu_MGH_51_V1	GCF_000694435.1	Klebsiella_pneumoniae	ST-258	NO	NO	NO	YES	NO	YES	NS
Kleb_pneu_MGH_52_V1	GCF_000694455.1	Klebsiella_pneumoniae	ST-70	YES	NO	YES	NO	YES	NO	S
Kleb_pneu_MGH_59_V1	GCF_000694475.2	Klebsiella_pneumoniae	ST-258	NO	NO	NO	YES	YES	YES	NS
Kleb_pneu_MGH_60_V1	GCF_000694495.1	Klebsiella_pneumoniae	ST-17	NO	NO	NO	NO	NO	NO	S
Kleb_pneu_MGH_63_V1	GCF_000688155.1	Klebsiella_pneumoniae	ST-15	NO	YES	YES	NO	YES	NO	NS
Kleb_pneu_MGH_64_V1	GCF_000694515.1	Klebsiella_pneumoniae	ST-35	YES	YES	YES	NO	NO	NO	S
Kleb_pneu_MGH_65_V1	GCF_000694535.1	Klebsiella_pneumoniae	ST-15	YES	YES	YES	NO	YES	NO	NS
Kleb_pneu_MGH_66_V1	GCF_000694555.1	Klebsiella_pneumoniae	ST-29	NO	NO	NO	NO	YES	NO	S
Kleb_pneu_MGH_67_V1	GCF_000694575.1	Klebsiella_pneumoniae	ST-258	NO	NO	NO	YES	NO	YES	NS
Kleb_pneu_MGH_69_V1	GCF_000694615.1	Klebsiella_pneumoniae	ST-11	NO	NO	NO	NO	YES	NO	NS
Kleb_pneu_MGH_70_V1	GCF_000694635.1	Klebsiella_pneumoniae	ST-20	NO	NO	NO	NO	YES	NO	S
Kleb_pneu_MGH_71_V1	GCF_000694655.1	Klebsiella_pneumoniae	ST-258	NO	NO	NO	NO	NO	YES	NS
Kleb_pneu_MGH_72_V1	GCF_000694675.1	Klebsiella_pneumoniae	ST-37	NO	NO	NO	YES	YES	NO	S
Kleb_pneu_MGH_73_V1	GCF_000694695.1	Klebsiella_pneumoniae	ST-258	NO	NO	NO	NO	NO	YES	NS
Kleb_pneu_MGH_74_V1	GCF_000694715.1	Klebsiella_pneumoniae	ST-76	NO	NO	NO	YES	YES	NO	S
Kleb_pneu_MGH_75_V1	GCF_000688215.1	Klebsiella_pneumoniae	ST-15	YES	YES	YES	NO	YES	NO	NS
Kleb_pneu_MGH_79_V1	GCF_000694755.1	Klebsiella_pneumoniae	ST-258	NO	NO	NO	YES	YES	YES	NS
Kleb_pneu_MGH101_V1	GCF_001033725.1	Klebsiella_pneumoniae	ST-15	YES	YES	YES	NO	YES	NO	NS
Kleb_pneu_MGH102_V1	GCF_001033745.1	Klebsiella_pneumoniae	ST-45	YES	YES	YES	NO	NO	YES	S
Kleb_pneu_MGH111_V1	GCF_001033755.1	Klebsiella_pneumoniae	ST-15	YES	YES	YES	NO	YES	NO	NS
Kleb_pneu_MGH112_V1	GCF_001033765.1	Klebsiella_pneumoniae	ST-560	NO	NO	NO	NO	NO	NO	S
Kleb_pneu_MGH115_V1	GCF_001033835.1	Klebsiella_pneumoniae	ST-15	YES	YES	YES	NO	YES	NO	NS
Kleb_pneu_MGH116_V1	GCF_001033845.1	Klebsiella_pneumoniae	ST-111	YES	YES	YES	NO	NO	NO	S
Kleb_pneu_MGH117_V1	GCF_001033885.1	Klebsiella_pneumoniae	ST-15	YES	YES	YES	NO	YES	NO	NS
Kleb_pneu_MGH118_V1	GCF_001033895.1	Klebsiella_pneumoniae	ST-628	NO	NO	NO	NO	NO	NO	S
Kleb_pneu_MGH124_V1	GCF_001033925.1	Klebsiella_pneumoniae	ST-14	YES	YES	YES	NO	NO	YES	S
Kleb_pneu_MGH125_V1	GCF_001033965.1	Klebsiella_pneumoniae	ST-258	NO	NO	NO	NO	NO	YES	NS
Kleb_pneu_MGH126_V1	GCF_001033975.1	Klebsiella_pneumoniae	ST-607	YES	YES	YES	NO	YES	NO	S
Kleb_pneu_MGH133_V1	GCF_002152405.1	Klebsiella_pneumoniae	ST-15	YES	YES	YES	NO	YES	NO	NS
Kleb_pneu_MGH134_V1	GCF_002152435.1	Klebsiella_pneumoniae	ST-478	NO	NO	NO	YES	YES	NO	S
Kleb_pneu_MGH140_V1	GCF_002153105.1	Klebsiella_pneumoniae	ST-258	NO	NO	NO	NO	NO	YES	S
Kleb_pneu_MGH147_V1	GCF_002152445.1	Klebsiella_pneumoniae	ST-628	NO	NO	NO	NO	NO	NO	NS
Kleb_pneu_MGH148_V1	GCF_002152475.1	Klebsiella_pneumoniae	ST-628	NO	NO	NO	NO	NO	NO	S
Kleb_pneu_MGH149_V1	GCF_002153115.1	Klebsiella_pneumoniae	ST-628	NO	NO	NO	NO	NO	NO	NS
Kleb_pneu_MGH150	GCA_014903675.1	Klebsiella_pneumoniae	ST-129	YES	YES	YES	NO	YES	NO	S
Kleb_pneu_MGH153_V1	GCF_002152485.1	Klebsiella_pneumoniae	ST-258	NO	NO	NO	NO	NO	NO	NS
Kleb_pneu_MGH155_V1	GCF_002152515.1	Klebsiella_pneumoniae	ST-15	YES	YES	YES	NO	YES	NO	NS
Kleb_pneu_MGH156_V1	GCF_002153165.1	Klebsiella_pneumoniae	ST-211	NO	NO	NO	NO	NO	YES	S
Kleb_pneu_MGH157_V1	GCF_002152525.1	Klebsiella_pneumoniae	ST-14	YES	YES	YES	YES	YES	NO	NS
Kleb_pneu_MGH158_V1	GCF_002152555.1	Klebsiella_pneumoniae	ST-152	NO	NO	NO	NO	NO	NO	S
Kleb_pneu_MGH161_V1	GCF_002153175.1	Klebsiella_pneumoniae	ST-628	NO	NO	NO	NO	NO	NO	NS
Kleb_pneu_MGH162_V1	GCF_002152565.1	Klebsiella_pneumoniae	ST-628	NO	NO	NO	NO	NO	NO	S
Kleb_pneu_MGH165_V1	GCF_002152595.1	Klebsiella_pneumoniae	ST-16	NO	NO	NO	NO	NO	NO	NS
Kleb_pneu_MGH166_V1	GCF_002152605.1	Klebsiella_pneumoniae	ST-37	NO	NO	NO	NO	NO	NO	S
Kleb_pneu_MGH167_V1	GCF_002152635.1	Klebsiella_pneumoniae	ST-628	NO	NO	NO	NO	NO	NO	NS
Kleb_pneu_MGH168_V1	GCF_002153155.1	Klebsiella_pneumoniae	ST-432	YES	NO	YES	NO	NO	YES	S
Kleb_pneu_MGH171_V1	GCF_002153275.1	Klebsiella_pneumoniae	ST-15	YES	YES	YES	YES	YES	NO	NS
Kleb_pneu_MGH172_V1	GCF_002152655.1	Klebsiella_pneumoniae	ST-45	YES	YES	YES	NO	NO	NO	S
Kleb_pneu_MGH181_V1	GCF_002153225.1	Klebsiella_pneumoniae	ST-258	NO	NO	NO	NO	NO	YES	NS
Kleb_pneu_MGH182	GCA_014903655.1	Klebsiella_pneumoniae	ST-870	YES	YES	YES	YES	NO	NO	S
Kleb_pneu_MGH185_V1	GCF_002152675.1	Klebsiella_pneumoniae	ST-405	NO	NO	NO	NO	YES	NO	NS
Kleb_pneu_MGH186_V1	GCF_002152685.1	Klebsiella_pneumoniae	ST-309	NO	NO	NO	NO	NO	YES	S
Kleb_pneu_MGH189	GCA_014903635.1	Klebsiella_pneumoniae	ST-248	YES	YES	YES	NO	YES	NO	NS
Kleb_pneu_MGH190	GCA_014903615.1	Klebsiella_pneumoniae	ST-628	NO	NO	NO	NO	NO	NO	S
Kleb_pneu_MGH191	GCA_014903595.1	Klebsiella_pneumoniae	ST-15	YES	YES	YES	YES	YES	NO	NS
Kleb_pneu_MGH192	GCA_014903555.1	Klebsiella_pneumoniae	ST-240	YES	YES	YES	NO	YES	NO	S
Kleb_pneu_MGH193	GCA_014903565.1	Klebsiella_pneumoniae	ST-268	NO	NO	NO	NO	NO	NO	NS
Kleb_pneu_MGH201	GCA_014903375.1	Klebsiella_pneumoniae	ST-15	YES	YES	YES	NO	YES	NO	NS
Kleb_pneu_MGH202	GCA_014903395.1	Klebsiella_pneumoniae	ST-65	NO	NO	NO	NO	NO	NO	S
Kleb_pneu_MGH203	GCA_014903355.1	Klebsiella_pneumoniae	ST-15	YES	YES	YES	NO	YES	NO	NS
Kleb_pneu_MGH204	GCA_014903335.1	Klebsiella_pneumoniae	ST-461	NO	NO	NO	NO	NO	NO	S
Kleb_pneu_MGH205	GCA_014903315.1	Klebsiella_pneumoniae	ST-307	NO	NO	NO	NO	YES	YES	NS
Kleb_pneu_MGH206	GCA_014903295.1	Klebsiella_pneumoniae	ST-277	YES	YES	YES	NO	NO	NO	S
Kleb_pneu_MGH211	GCA_014903185.1	Klebsiella_pneumoniae	ST-909	NO	NO	NO	YES	NO	NO	NS
Kleb_pneu_MGH221	GCA_014902985.1	Klebsiella_pneumoniae	ST-20	NO	NO	NO	YES	NO	NO	NS
Kleb_pneu_MGH222	GCA_014902955.1	Klebsiella_pneumoniae	ST-15	YES	YES	YES	NO	NO	NO	S
Kleb_pneu_MGH227	GCA_014902875.1	Klebsiella_pneumoniae	ST-189	YES	NO	YES	NO	YES	NO	NS
Kleb_pneu_MGH228	GCA_014902895.1	Klebsiella_pneumoniae	ST-17	NO	NO	NO	YES	NO	NO	S
Kleb_pneu_MGH229	GCA_014902835.1	Klebsiella_pneumoniae	ST-20	NO	NO	NO	NO	YES	NO	S
Kleb_pneu_MGH230	GCA_014902805.1	Klebsiella_pneumoniae	ST-405	NO	NO	NO	NO	YES	NO	NS
Kleb_pneu_MGH235	GCA_014902715.1	Klebsiella_pneumoniae	ST-20	NO	NO	NO	NO	YES	NO	NS
Kleb_pneu_MGH251	GCA_014902435.1	Klebsiella_pneumoniae	ST-626	NO	NO	NO	YES	NO	NO	NS
Kleb_pneu_MGH252	GCA_014902415.1	Klebsiella_pneumoniae	ST-580	YES	YES	YES	YES	YES	NO	S
Kleb_pneu_MGH81_V1	GCF_001033455.1	Klebsiella_pneumoniae	ST-15	YES	YES	YES	NO	YES	NO	NS
Kleb_pneu_MGH82_V1	GCF_001033465.1	Klebsiella_pneumoniae	ST-37	NO	NO	NO	YES	NO	NO	S
Kleb_pneu_MGH83	GCF_001185665.1	Klebsiella_pneumoniae	ST-309	NO	NO	NO	NO	NO	NO	NS
Kleb_pneu_MGH84_V1	GCF_001033505.1	Klebsiella_pneumoniae	ST-111	YES	YES	YES	NO	YES	YES	S
Kleb_pneu_MGH89_V1	GCF_001033525.1	Klebsiella_pneumoniae	ST-392	YES	YES	YES	YES	YES	NO	NS
Kleb_pneu_MGH90_V1	GCF_001033535.1	Klebsiella_pneumoniae	ST-784	NO	NO	NO	YES	NO	NO	S
Kleb_pneu_MGH91_V1	GCF_001033565.1	Klebsiella_pneumoniae	ST-258	NO	NO	NO	NO	NO	YES	NS
Kleb_pneu_MGH93_V1	GCF_001033585.1	Klebsiella_pneumoniae	ST-147	YES	YES	YES	YES	NO	NO	NS
Kleb_pneu_MGH94_V1	GCF_001033615.1	Klebsiella_pneumoniae	ST-23	YES	YES	YES	NO	YES	YES	S
Kleb_pneu_MGH95_V1	GCF_001033645.1	Klebsiella_pneumoniae	ST-258	NO	NO	NO	NO	NO	YES	NS
Kleb_pneu_MGH97_V1	GCF_001033675.1	Klebsiella_pneumoniae	ST-70	YES	NO	YES	NO	YES	NO	NS
Kleb_pneu_MGH98_V1	GCF_001033685.1	Klebsiella_pneumoniae	ST-23	NO	NO	NO	NO	NO	NO	S
Kleb_pneu_UCI_1_V1	GCA_000567525.1	Klebsiella_pneumoniae	ST-258	NO	NO	NO	NO	NO	YES	NS
Kleb_pneu_UCI_13_V1	GCA_000567845.1	Klebsiella_pneumoniae	ST-258	NO	NO	NO	NO	YES	YES	NS
Kleb_pneu_UCI_17_V1	GCF_000706585.1	Klebsiella_pneumoniae	ST-437	NO	NO	NO	YES	YES	NO	NS
Kleb_pneu_UCI_19_V1	GCF_000566985.1	Klebsiella_pneumoniae	ST-258	NO	NO	NO	NO	NO	YES	NS
Kleb_pneu_UCI_2_V1	GCA_000492635.1	Klebsiella_pneumoniae	ST-37	NO	NO	NO	NO	NO	NO	S
Kleb_pneu_UCI_20_V1	GCF_000566965.1	Klebsiella_pneumoniae	ST-268	NO	NO	NO	YES	NO	NO	S
Kleb_pneu_UCI_21_V1	GCF_000566945.1	Klebsiella_pneumoniae	ST-258	NO	NO	NO	NO	YES	YES	NS
Kleb_pneu_UCI_22_V1	GCF_000566925.1	Klebsiella_pneumoniae	ST-258	NO	NO	NO	NO	NO	YES	S
Kleb_pneu_UCI_25_V1	GCF_000566905.1	Klebsiella_pneumoniae	ST-873	YES	YES	YES	NO	YES	NO	NS
Kleb_pneu_UCI_26_V1	GCF_000566885.1	Klebsiella_pneumoniae	ST-322	NO	NO	NO	NO	NO	NO	S
Kleb_pneu_UCI_33_V1	GCF_000566865.1	Klebsiella_pneumoniae	ST-258	NO	NO	NO	NO	YES	YES	NS
Kleb_pneu_UCI_34_V1	GCF_000566845.1	Klebsiella_pneumoniae	ST-34	YES	YES	YES	NO	NO	NO	S
Kleb_pneu_UCI_37_V1	GCF_000566825.1	Klebsiella_pneumoniae	ST-258	NO	NO	NO	NO	YES	YES	NS
Kleb_pneu_UCI_38_V1	GCF_000566805.1	Klebsiella_pneumoniae	ST-258	NO	NO	NO	NO	YES	YES	S
Kleb_pneu_UCI_4_V1	GCA_000492595.1	Klebsiella_pneumoniae	ST-14	NO	NO	NO	NO	NO	NO	S
Kleb_pneu_UCI_41_V1	GCF_000566785.1	Klebsiella_pneumoniae	ST-258	NO	NO	NO	NO	YES	YES	NS
Kleb_pneu_UCI_42_V1	GCF_000566765.1	Klebsiella_pneumoniae	ST-86	NO	NO	NO	YES	NO	NO	S
Kleb_pneu_UCI_43_V1	GCF_000566745.1	Klebsiella_pneumoniae	ST-258	NO	NO	NO	NO	YES	YES	S
Kleb_pneu_UCI_44_V1	GCF_000566725.1	Klebsiella_pneumoniae	ST-258	NO	NO	NO	NO	YES	YES	S
Kleb_pneu_UCI_55_V1	GCF_000694795.1	Klebsiella_pneumoniae	ST-258	NO	NO	NO	NO	YES	YES	NS
Kleb_pneu_UCI_56_V1	GCF_000694815.1	Klebsiella_pneumoniae	ST-678	NO	NO	NO	NO	YES	NO	S
Kleb_pneu_UCI_59_V1	GCF_000694835.1	Klebsiella_pneumoniae	ST-258	NO	NO	NO	NO	YES	YES	NS
Kleb_pneu_UCI_6_V1	GCA_000492555.1	Klebsiella_pneumoniae	ST-86	NO	NO	NO	NO	NO	NO	S
Kleb_pneu_UCI_60_V1	GCF_000688195.1	Klebsiella_pneumoniae	ST-728	YES	YES	YES	NO	YES	NO	S
Kleb_pneu_UCI_61_V1	GCF_000694855.1	Klebsiella_pneumoniae	ST-258	NO	NO	NO	YES	NO	YES	NS
Kleb_pneu_UCI_62_V1	GCF_000694875.1	Klebsiella_pneumoniae	ST-34	YES	YES	YES	NO	NO	NO	S
Kleb_pneu_UCI_63_V1	GCF_000694895.1	Klebsiella_pneumoniae	ST-258	NO	NO	NO	NO	YES	YES	NS
Kleb_pneu_UCI_64_V1	GCF_000688175.1	Klebsiella_pneumoniae	ST-17	NO	NO	NO	YES	NO	NO	S
Kleb_pneu_UCI_67_V1	GCF_000694915.1	Klebsiella_pneumoniae	ST-258	NO	NO	NO	NO	NO	YES	NS
Kleb_pneu_UCI_68_V1	GCF_000694935.1	Klebsiella_pneumoniae	ST-37	NO	NO	NO	NO	YES	NO	S
Kleb_pneu_UCI_7_V1	GCA_000492535.1	Klebsiella_pneumoniae	ST-17	NO	NO	NO	YES	NO	NO	S
Kleb_pneu_UCI_8_V1	GCA_000492515.1	Klebsiella_pneumoniae	ST-1198	NO	NO	NO	YES	NO	NO	S
Kleb_pneu_UCI105_V1	GCF_002153215.1	Klebsiella_pneumoniae	ST-258	NO	NO	NO	NO	YES	YES	NS
Kleb_pneu_UCI106_V1	GCF_002152695.1	Klebsiella_pneumoniae	ST-1037	YES	YES	YES	YES	NO	NO	S
Kleb_pneu_UCI107_V1	GCF_002153285.1	Klebsiella_pneumoniae	ST-515	NO	NO	NO	NO	NO	NO	NS
Kleb_pneu_UCI108_V1	GCF_002163225.1	Klebsiella_pneumoniae	ST-466	YES	YES	YES	NO	NO	NO	S
Kleb_pneu_UCI109_V1	GCF_002152735.1	Klebsiella_pneumoniae	ST-258	NO	NO	NO	NO	YES	NO	NS
Kleb_pneu_UCI110_V1	GCF_002153255.1	Klebsiella_pneumoniae	ST-23	YES	YES	YES	NO	YES	NO	S
Kleb_pneu_UCI111_V1	GCF_002153305.1	Klebsiella_pneumoniae	ST-678	NO	NO	NO	NO	YES	NO	NS
Kleb_pneu_UCI112_V1	GCF_002152765.1	Klebsiella_pneumoniae	ST-163	YES	YES	YES	NO	NO	NO	S
Kleb_pneu_UCI113_V1	GCF_002152755.1	Klebsiella_pneumoniae	ST-258	NO	NO	NO	YES	YES	NO	NS
Kleb_pneu_UCI114_V1	GCF_002152775.1	Klebsiella_pneumoniae	ST-261	NO	NO	NO	YES	YES	NO	#N/A
Kleb_pneu_UCI115_V1	GCF_002152815.1	Klebsiella_pneumoniae	ST-258	NO	NO	NO	YES	NO	YES	NS
Kleb_pneu_UCI116_V1	GCF_002152825.1	Klebsiella_pneumoniae	ST-15	YES	YES	YES	YES	YES	NO	#N/A
Kleb_pneu_UCI117_V1	GCA_002153315.2	Klebsiella_pneumoniae	ST-258	NO	NO	NO	NO	YES	YES	NS
Kleb_pneu_UCI118_V1	GCF_002152865.1	Klebsiella_pneumoniae	ST-659	NO	NO	NO	NO	NO	YES	#N/A
Kleb_pneu_UCI149	GCA_014901915.1	Klebsiella_pneumoniae	ST-15	YES	YES	YES	YES	YES	YES	NS
Kleb_pneu_UCI150	GCA_014901895.1	Klebsiella_pneumoniae	ST-37	NO	NO	NO	NO	YES	NO	#N/A
Kleb_pneu_UCI163	GCA_014901695.1	Klebsiella_pneumoniae	ST-258	NO	NO	NO	NO	NO	YES	#N/A
Kleb_pneu_UCI164	GCA_014901665.1	Klebsiella_pneumoniae	ST-849	NO	NO	NO	YES	YES	NO	#N/A
Kleb_pneu_UCI171	GCA_014901535.1	Klebsiella_pneumoniae	ST-258	NO	NO	NO	NO	NO	YES	NS
Kleb_pneu_UCI172	GCA_014894845.1	Klebsiella_pneumoniae	ST-1138	NO	NO	NO	NO	YES	NO	S
Kleb_pneu_UCI177	GCA_014901475.1	Klebsiella_pneumoniae	ST-258	NO	NO	NO	NO	YES	YES	NS
Kleb_pneu_UCI178	#N/A	Klebsiella_pneumoniae	ST-45	YES	YES	YES	NO	NO	YES	#N/A
Kleb_pneu_UCI181	GCA_014901415.1	Klebsiella_pneumoniae	ST-16	NO	NO	NO	YES	YES	NO	#N/A
Kleb_pneu_UCI182	GCA_014901395.1	Klebsiella_pneumoniae	ST-872	YES	YES	YES	YES	NO	YES	S
Kleb_pneu_UCI185	GCA_014901345.1	Klebsiella_pneumoniae	ST-258	NO	NO	NO	NO	YES	YES	NS
Kleb_pneu_UCI186	GCA_014901325.1	Klebsiella_pneumoniae	ST-239	NO	NO	NO	NO	NO	NO	#N/A
Kleb_pneu_UCI187	GCA_014901295.1	Klebsiella_pneumoniae	ST-45	YES	YES	YES	NO	NO	YES	NS
Kleb_pneu_UCI188	GCA_014901275.1	Klebsiella_pneumoniae	ST-86	NO	NO	NO	NO	NO	NO	S
Kleb_pneu_UCI189	GCA_014901215.1	Klebsiella_pneumoniae	ST-16	NO	NO	NO	NO	YES	NO	S
Kleb_pneu_UCI190	GCA_014333235.1	Klebsiella_pneumoniae	ST-116	YES	YES	YES	NO	YES	NO	S
Kleb_pneu_UCI192	#N/A	Klebsiella_pneumoniae	ST-200	NO	NO	NO	NO	NO	NO	S
Kleb_pneu_UCI195	#N/A	Klebsiella_pneumoniae	ST-258	NO	NO	NO	YES	NO	NO	NS
Kleb_pneu_UCI196	#N/A	Klebsiella_pneumoniae	ST-23	YES	YES	YES	NO	YES	NO	S
Kleb_pneu_UCI197	#N/A	Klebsiella_pneumoniae	ST-37	NO	NO	NO	YES	YES	NO	#N/A
Kleb_pneu_UCI198	#N/A	Klebsiella_pneumoniae	ST-16	NO	NO	NO	YES	NO	NO	#N/A
Kleb_pneu_UCI199	#N/A	Klebsiella_pneumoniae	ST-307	NO	NO	NO	YES	YES	NO	NS
Kleb_pneu_UCI200	#N/A	Klebsiella_pneumoniae	ST-427	YES	YES	YES	NO	YES	NO	#N/A
Kleb_pneu_UCI201	#N/A	Klebsiella_pneumoniae	ST-307	NO	NO	NO	YES	YES	NO	S
Kleb_pneu_UCI202	#N/A	Klebsiella_pneumoniae	ST-299	NO	NO	NO	NO	NO	NO	#N/A
Kleb_Pneu_UCI69_V1	GCF_001185685.1	Klebsiella_pneumoniae	ST-258	NO	NO	NO	NO	NO	YES	NS
Kleb_Pneu_UCI70_V1	GCF_001034155.1	Klebsiella_pneumoniae	ST-997	NO	NO	NO	NO	YES	NO	S
Kleb_Pneu_UCI75_V1	GCF_001034165.1	Klebsiella_pneumoniae	ST-258	NO	NO	NO	NO	NO	YES	NS
Kleb_Pneu_UCI76_V1	GCF_001034205.1	Klebsiella_pneumoniae	ST-322	YES	YES	YES	NO	NO	NO	#N/A
Kleb_Pneu_UCI81_V1	GCF_001034215.1	Klebsiella_pneumoniae	ST-258	NO	NO	NO	NO	YES	YES	NS
Kleb_Pneu_UCI82_V1	GCF_001034235.1	Klebsiella_pneumoniae	ST-45	YES	YES	YES	NO	NO	NO	S
Kleb_Pneu_UCI91_V1	GCF_001034245.1	Klebsiella_pneumoniae	ST-258	NO	NO	NO	NO	YES	YES	NS
Kleb_Pneu_UCI92_V1	GCF_001034285.1	Klebsiella_pneumoniae	ST-107	NO	NO	NO	NO	YES	NO	#N/A
Kleb_Pneu_UCI93_V1	GCF_001034295.1	Klebsiella_pneumoniae	ST-258	NO	NO	NO	NO	YES	YES	NS
Kleb_Pneu_UCI94_V1	GCF_001034305.1	Klebsiella_pneumoniae	ST-277	YES	YES	YES	NO	NO	NO	#N/A
Kleb_Pneu_UCI95_V1	GCF_001034325.1	Klebsiella_pneumoniae	ST-258	NO	NO	NO	NO	NO	NO	NS
Kleb_Pneu_UCI96_V1	GCF_001034365.1	Klebsiella_pneumoniae	ST-15	YES	YES	YES	NO	NO	NO	#N/A
Kleb_pneu_UCICRE-123	GCA_014902375.1	Klebsiella_pneumoniae	ST-280	NO	NO	NO	NO	YES	NO	NS
Kleb_pneu_UCICRE-124	GCA_014902355.1	Klebsiella_pneumoniae	ST-20	NO	NO	NO	NO	NO	NO	#N/A
Kleb_pneu_UCICRE-125	GCA_014902395.1	Klebsiella_pneumoniae	ST-307	NO	NO	NO	YES	YES	NO	NS
Kleb_pneu_UCICRE-126	GCA_014902315.1	Klebsiella_pneumoniae	ST-147	YES	YES	YES	YES	NO	NO	#N/A
Kleb_pneu_UCICRE-130	GCA_014902285.1	Klebsiella_pneumoniae	ST-1138	NO	NO	NO	NO	NO	NO	#N/A
Kleb_pneu_UCICRE-133	GCA_014902205.1	Klebsiella_pneumoniae	ST-258	NO	NO	NO	YES	NO	YES	NS
Kleb_pneu_UCICRE-134	GCA_014902235.1	Klebsiella_pneumoniae	ST-420	NO	NO	NO	YES	NO	NO	#N/A
Kleb_pneu_UCICRE-137	GCA_014902175.1	Klebsiella_pneumoniae	ST-258	NO	NO	NO	NO	YES	YES	NS
Kleb_pneu_UCICRE-138	GCA_014902155.1	Klebsiella_pneumoniae	ST-70	YES	NO	YES	NO	NO	NO	#N/A
Kleb_pneu_UCICRE-139	GCA_014902115.1	Klebsiella_pneumoniae	ST-258	NO	NO	NO	NO	NO	YES	NS
Kleb_pneu_UCICRE-140	GCA_014902085.1	Klebsiella_pneumoniae	ST-611	NO	NO	NO	NO	NO	NO	S
Kleb_pneu_UCICRE-145	GCA_014902005.1	Klebsiella_pneumoniae	ST-258	NO	NO	NO	NO	YES	YES	NS
