# Supplementary material for: Genetic determinants facilitating the evolution of resistance to carbapenem antibiotics
Source: eLife journal article supplement (doi:10.7554/elife.67310), 2021-04-19
Supplement: supp [file elife-67310-supp-v1.zip › elife_poa_e67310_Supplementary_file_4.xlsx]

## Sheet: Supplementary file 4
Supplementary file 4. The presence or absence of CRISPR-Cas systems in 2453 K. pneumoniae strains
Strain IDs	MLST	CRISPR Arrays	cas1	cas3
Kleb_pneu_subsp._pneumoniae_GCA_002251875.1	*ST-1004	1
Kleb_pneu_subsp._pneumoniae_GCA_001316765.2_V1	*ST-101	0
Kleb_pneu_subsp._pneumoniae_GCA_001316925.2_V1	*ST-101	0
Kleb_pneu_subsp._pneumoniae_GCA_001316945.2_V1	*ST-101	0
Kleb_pneu_GCA_002186995.1	*ST-1015	0
Kleb_pneu_GCA_900176585.1	*ST-104	3	Kleb_pneu_GCA_900173585.1_V1_PatKP1280_004043T0	Kleb_pneu_GCA_900176585.1.annotation.cds_PatKP2473_001153T0
Kleb_pneu_GCA_900085805.1_V1	*ST-1041	0
Kleb_pneu_subsp._pneumoniae_GCA_900180885.1	*ST-1051	0
Kleb_pneu_GCA_000821545.1_V1	*ST-1079	0
Kleb_pneu_GCA_001460505.1_V1	*ST-1079	1	Kleb_pneu_GCA_002181635.1_PatKP2344_002500T0	Kleb_pneu_GCA_001460505.1_V1.annotation.cds_PatKP342_002112T0
Kleb_pneu_GCA_900086005.1_V1	*ST-1083	1	Kleb_pneu_GCA_900084735.1_V1_PatKP859_001299T0	Kleb_pneu_GCA_900086005.1_V1.annotation.cds_PatKP984_004004T0
Kleb_pneu_GCA_001879345.1_V1	*ST-11	0
Kleb_pneu_GCA_001901725.1_V1	*ST-11	0
Kleb_pneu_GCA_002234875.1	*ST-11	0
Kleb_pneu_GCA_002264905.1	*ST-11	0
Kleb_pneu_GCA_002264915.1	*ST-11	0
Kleb_pneu_subsp._pneumoniae_GCA_002248425.1	*ST-11	0
Kleb_pneu_GCA_900084185.1_V1	*ST-111	2	Kleb_pneu_GCA_002180315.1_PatKP2272_001056T0	Kleb_pneu_GCA_001482345.1_V1.annotation.cds_PatKP387_004818T0
Kleb_pneu_subsp._pneumoniae_GCA_002317885.1	*ST-111	2	Kleb_pneu_GCA_002180315.1_PatKP2272_001056T0	Kleb_pneu_GCA_001482345.1_V1.annotation.cds_PatKP387_004818T0
Kleb_pneu_GCA_001663455.1_V1	*ST-1119	0
Kleb_pneu_GCA_002184985.1	*ST-1119	0
Kleb_pneu_GCA_002257975.1	*ST-1119	1	Kleb_pneu_GCA_900084735.1_V1_PatKP859_001299T0	Kleb_pneu_GCA_002257975.1.annotation.cds_PatKP1505_004757T0
Kleb_pneu_GCA_900084815.1_V1	*ST-1121	0
Kleb_pneu_GCA_900084085.1_V1	*ST-1138	0
Kleb_pneu_MGH_39_V1	*ST-1138	0
Kleb_pneu_UCI172	*ST-1138	0
Kleb_pneu_UCICRE-130	*ST-1138	0
Kleb_pneu_GCA_900084975.1_V1	*ST-1159	0
Kleb_pneu_BWH_30_V1	*ST-1164	0
Kleb_pneu_GCA_000822685.1_V1	*ST-1172	0
Kleb_pneu_EGD-HP19-C_GCA_000444855.2_V1	*ST-1172	1	Kleb_pneu_GCA_900084735.1_V1_PatKP859_001299T0	Kleb_pneu_GCA_900093445.1_V1.annotation.cds_PatKP1114_001216T0
Kleb_pneu_GCA_000821665.1_V1	*ST-1187	1		Kleb_pneu_GCA_000821665.1_V1.annotation.cds_PatKP181_002151T0
Kleb_pneu_GCA_002181225.1	*ST-1229	1	Kleb_pneu_GCA_002181225.1_PatKP2362_003851T0	Kleb_pneu_GCA_002181225.1.annotation.cds_PatKP2362_003857T0
Kleb_pneu_subsp._pneumoniae_GCA_900180625.1	*ST-1229	1	Kleb_pneu_GCA_002181225.1_PatKP2362_003851T0	Kleb_pneu_GCA_002181225.1.annotation.cds_PatKP2362_003857T0
Kleb_pneu_GCA_900172715.1_V1	*ST-125	0
Kleb_pneu_GCA_001063935.1_V1	*ST-1254	0
Kleb_pneu_GCA_002186725.1	*ST-1254	0
Kleb_pneu_GCA_002187585.1	*ST-1254	0
Kleb_pneu_GCA_001879325.1_V1	*ST-14	1	Kleb_pneu_GCA_002180315.1_PatKP2272_001056T0	Kleb_pneu_GCA_001879325.1_V1.annotation.cds_PatKP599_004690T0
Kleb_pneu_GCA_001701575.1_V1	*ST-14	3	Kleb_pneu_GCA_002180315.1_PatKP2272_001056T0	Kleb_pneu_GCA_002180315.1.annotation.cds_PatKP2272_001050T0
Kleb_pneu_GCA_002508285.1	*ST-15	2	Kleb_pneu_subsp._pneumoniae_GCA_900180835.1_PatKP1697_001737T0
Kleb_pneu_GCA_000788005.1_V1	*ST-15	2	Kleb_pneu_subsp._pneumoniae_GCA_900180835.1_PatKP1697_001737T0	Kleb_pneu_GCA_002186695.1.annotation.cds_PatKP2380_004496T0
Kleb_pneu_GCA_000764635.1_V1	*ST-15	2	Kleb_pneu_subsp._pneumoniae_GCA_900180835.1_PatKP1697_001737T0	Kleb_pneu_subsp._pneumoniae_GCA_900180835.1.annotation.cds_PatKP1697_001743T0
Kleb_pneu_GCA_001720905.1_V1	*ST-15	2	Kleb_pneu_subsp._pneumoniae_GCA_900180835.1_PatKP1697_001737T0	Kleb_pneu_subsp._pneumoniae_GCA_900180835.1.annotation.cds_PatKP1697_001743T0
Kleb_pneu_MGH111_V1	*ST-15	2	Kleb_pneu_subsp._pneumoniae_GCA_900180835.1_PatKP1697_001737T0	Kleb_pneu_subsp._pneumoniae_GCA_900180835.1.annotation.cds_PatKP1697_001743T0
Kleb_pneu_MGH133_V1	*ST-15	2	Kleb_pneu_subsp._pneumoniae_GCA_900180835.1_PatKP1697_001737T0	Kleb_pneu_subsp._pneumoniae_GCA_900180835.1.annotation.cds_PatKP1697_001743T0
Kleb_pneu_GCA_000943155.1_V1	*ST-152	0
Kleb_pneu_GCA_001938035.1_V1	*ST-16	0
Kleb_pneu_UCI181	*ST-16	0
Kleb_pneu_UCI112_V1	*ST-163	1	Kleb_pneu_GCA_001597035.1_V1_PatKP451_000153T0	Kleb_pneu_GCA_001597035.1_V1.annotation.cds_PatKP451_000147T0
Kleb_pneu_GCA_002412175.1	*ST-164	0
Kleb_pneu_BIDMC89_V1	*ST-17	0
Kleb_pneu_GCA_001901735.1_V1	*ST-17	0
Kleb_pneu_GCA_002269865.1	*ST-178	2	Kleb_pneu_GCA_002180315.1_PatKP2272_001056T0	Kleb_pneu_GCA_002269865.1.annotation.cds_PatKP1624_001034T0
Kleb_pneu_GCA_900171905.1_V1	*ST-180	2	Kleb_pneu_GCA_002180315.1_PatKP2272_001056T0	Kleb_pneu_GCA_002751565.1.annotation.cds_PatKP1611_000660T0
Kleb_pneu_GCA_900171815.1_V1	*ST-182	0
Kleb_pneu_GCA_001646625.1_V1	*ST-186	0
Kleb_pneu_GCA_001676825.1_V1	*ST-186	0
Kleb_pneu_GCA_000822485.1_V1	*ST-187	0
Kleb_pneu_MGH227	*ST-189	1		Kleb_pneu_GCA_900172985.1_V1.annotation.cds_PatKP1222_004078T0
Kleb_pneu_GCA_900171875.1_V1	*ST-189	1	Kleb_pneu_GCA_900172985.1_V1_PatKP1222_004072T0	Kleb_pneu_GCA_900172985.1_V1.annotation.cds_PatKP1222_004078T0
Kleb_pneu_GCA_900171945.1_V1	*ST-189	1	Kleb_pneu_GCA_900172985.1_V1_PatKP1222_004072T0	Kleb_pneu_GCA_900172985.1_V1.annotation.cds_PatKP1222_004078T0
Kleb_pneu_GCA_900172035.1_V1	*ST-189	1	Kleb_pneu_GCA_900172985.1_V1_PatKP1222_004072T0	Kleb_pneu_GCA_900172985.1_V1.annotation.cds_PatKP1222_004078T0
Kleb_pneu_GCA_900172115.1_V1	*ST-189	1	Kleb_pneu_GCA_900172985.1_V1_PatKP1222_004072T0	Kleb_pneu_GCA_900172985.1_V1.annotation.cds_PatKP1222_004078T0
Kleb_pneu_GCA_900172165.1_V1	*ST-189	1	Kleb_pneu_GCA_900172985.1_V1_PatKP1222_004072T0	Kleb_pneu_GCA_900172985.1_V1.annotation.cds_PatKP1222_004078T0
Kleb_pneu_GCA_900172675.1_V1	*ST-189	1	Kleb_pneu_GCA_900172985.1_V1_PatKP1222_004072T0	Kleb_pneu_GCA_900172985.1_V1.annotation.cds_PatKP1222_004078T0
Kleb_pneu_GCA_900172965.1_V1	*ST-189	1	Kleb_pneu_GCA_900172985.1_V1_PatKP1222_004072T0	Kleb_pneu_GCA_900172985.1_V1.annotation.cds_PatKP1222_004078T0
Kleb_pneu_GCA_900172985.1_V1	*ST-189	1	Kleb_pneu_GCA_900172985.1_V1_PatKP1222_004072T0	Kleb_pneu_GCA_900172985.1_V1.annotation.cds_PatKP1222_004078T0
Kleb_pneu_GCA_900173005.1_V1	*ST-189	1	Kleb_pneu_GCA_900172985.1_V1_PatKP1222_004072T0	Kleb_pneu_GCA_900172985.1_V1.annotation.cds_PatKP1222_004078T0
Kleb_pneu_GCA_900173145.1_V1	*ST-189	1	Kleb_pneu_GCA_900172985.1_V1_PatKP1222_004072T0	Kleb_pneu_GCA_900172985.1_V1.annotation.cds_PatKP1222_004078T0
Kleb_pneu_GCA_900173155.1_V1	*ST-189	1	Kleb_pneu_GCA_900172985.1_V1_PatKP1222_004072T0	Kleb_pneu_GCA_900172985.1_V1.annotation.cds_PatKP1222_004078T0
Kleb_pneu_GCA_900173175.1_V1	*ST-189	1	Kleb_pneu_GCA_900172985.1_V1_PatKP1222_004072T0	Kleb_pneu_GCA_900172985.1_V1.annotation.cds_PatKP1222_004078T0
Kleb_pneu_GCA_900173245.1_V1	*ST-189	1	Kleb_pneu_GCA_900172985.1_V1_PatKP1222_004072T0	Kleb_pneu_GCA_900172985.1_V1.annotation.cds_PatKP1222_004078T0
Kleb_pneu_MGH_48_V1	*ST-189	1	Kleb_pneu_GCA_900172985.1_V1_PatKP1222_004072T0	Kleb_pneu_GCA_900172985.1_V1.annotation.cds_PatKP1222_004078T0
Kleb_pneu_GCA_900172995.1_V1	*ST-189	1	Kleb_pneu_GCA_900172995.1_V1_PatKP1223_003656T0	Kleb_pneu_GCA_900172985.1_V1.annotation.cds_PatKP1222_004078T0
Kleb_pneu_ATCC_25955_GCA_000409715.1_V1	*ST-20	0
Kleb_pneu_G5-2_GCA_000409735.1_V1	*ST-20	0
Kleb_pneu_GCA_002411675.1	*ST-20	0
Kleb_pneu_GCA_900085815.1_V1	*ST-211	0
Kleb_pneu_MGH156_V1	*ST-211	0
Kleb_pneu_GCA_900092795.1_V1	*ST-219	0
Kleb_pneu_GCA_002187015.1	*ST-22	0
Kleb_pneu_GCA_900084635.1_V1	*ST-225	0
Kleb_pneu_GCA_900084245.1_V1	*ST-228	1	Kleb_pneu_GCA_900084735.1_V1_PatKP859_001299T0	Kleb_pneu_GCA_900085895.1_V1.annotation.cds_PatKP973_000333T0
Kleb_pneu_MGH98_V1	*ST-23	0
Kleb_pneu_GCA_001721545.1_V1	*ST-23	2	Kleb_pneu_GCA_900174075.1_V1_PatKP1328_001640T0	Kleb_pneu_subsp._pneumoniae_GCA_900180835.1.annotation.cds_PatKP1697_001743T0
Kleb_pneu_GCA_000823025.1_V1	*ST-230	0
Kleb_pneu_GCA_900093075.1_V1	*ST-230	0
Kleb_pneu_subsp._pneumoniae_GCA_002249535.1	*ST-230	0
Kleb_pneu_GCA_900085985.1_V1	*ST-230	1	Kleb_pneu_GCA_900084735.1_V1_PatKP859_001299T0	Kleb_pneu_GCA_000818615.1_V1.annotation.cds_PatKP167_001374T0
Kleb_pneu_subsp._pneumoniae_GCA_002247895.1	*ST-234	0
Kleb_pneu_subsp._pneumoniae_GCA_002247625.1	*ST-236	0
Kleb_pneu_GCA_900084755.1_V1	*ST-237	1	Kleb_pneu_GCA_000822105.1_V1_PatKP199_004801T0	Kleb_pneu_GCA_900084755.1_V1.annotation.cds_PatKP861_003678T0
Kleb_pneu_GCA_001064035.1_V1	*ST-247	0
Kleb_pneu_MGH189	*ST-248	2	Kleb_pneu_GCA_002180315.1_PatKP2272_001056T0	Kleb_pneu_GCA_900093015.1_V1.annotation.cds_PatKP1072_003822T0
Kleb_pneu_GCA_900173235.1_V1	*ST-252	1	Kleb_pneu_GCA_900084735.1_V1_PatKP859_001299T0	Kleb_pneu_GCA_900173725.1_V1.annotation.cds_PatKP1294_001642T0
Kleb_pneu_GCA_900173325.1_V1	*ST-252	1	Kleb_pneu_GCA_900084735.1_V1_PatKP859_001299T0	Kleb_pneu_GCA_900173725.1_V1.annotation.cds_PatKP1294_001642T0
Kleb_pneu_GCA_900173725.1_V1	*ST-252	1	Kleb_pneu_GCA_900084735.1_V1_PatKP859_001299T0	Kleb_pneu_GCA_900173725.1_V1.annotation.cds_PatKP1294_001642T0
Kleb_pneu_GCA_900173765.1_V1	*ST-252	1	Kleb_pneu_GCA_900084735.1_V1_PatKP859_001299T0	Kleb_pneu_GCA_900173725.1_V1.annotation.cds_PatKP1294_001642T0
Kleb_pneu_GCA_900173935.1_V1	*ST-252	1	Kleb_pneu_GCA_900084735.1_V1_PatKP859_001299T0	Kleb_pneu_GCA_900173725.1_V1.annotation.cds_PatKP1294_001642T0
Kleb_pneu_GCA_900174315.1_V1	*ST-252	1	Kleb_pneu_GCA_900084735.1_V1_PatKP859_001299T0	Kleb_pneu_GCA_900173725.1_V1.annotation.cds_PatKP1294_001642T0
Kleb_pneu_GCA_900174335.1_V1	*ST-252	1	Kleb_pneu_GCA_900084735.1_V1_PatKP859_001299T0	Kleb_pneu_GCA_900173725.1_V1.annotation.cds_PatKP1294_001642T0
Kleb_pneu_GCA_900173355.1_V1	*ST-252	2	Kleb_pneu_GCA_900084735.1_V1_PatKP859_001299T0	Kleb_pneu_GCA_900173725.1_V1.annotation.cds_PatKP1294_001642T0
Kleb_pneu_GCA_900173745.1_V1	*ST-252	2	Kleb_pneu_GCA_900084735.1_V1_PatKP859_001299T0	Kleb_pneu_GCA_900173725.1_V1.annotation.cds_PatKP1294_001642T0
Kleb_pneu_GCA_900173755.1_V1	*ST-252	2	Kleb_pneu_GCA_900084735.1_V1_PatKP859_001299T0	Kleb_pneu_GCA_900173725.1_V1.annotation.cds_PatKP1294_001642T0
Kleb_pneu_GCA_900173915.1_V1	*ST-252	2	Kleb_pneu_GCA_900084735.1_V1_PatKP859_001299T0	Kleb_pneu_GCA_900173725.1_V1.annotation.cds_PatKP1294_001642T0
Kleb_pneu_GCA_900174235.1_V1	*ST-252	2	Kleb_pneu_GCA_900084735.1_V1_PatKP859_001299T0	Kleb_pneu_GCA_900173725.1_V1.annotation.cds_PatKP1294_001642T0
Kleb_pneu_GCA_002182245.1	*ST-258	0
Kleb_pneu_GCA_002185515.1	*ST-258	0
Kleb_pneu_GCA_900171715.1_V1	*ST-26	1	Kleb_pneu_GCA_001597035.1_V1_PatKP451_000153T0	Kleb_pneu_GCA_001597035.1_V1.annotation.cds_PatKP451_000147T0
Kleb_pneu_GCA_900171725.1_V1	*ST-26	1	Kleb_pneu_GCA_001597035.1_V1_PatKP451_000153T0	Kleb_pneu_GCA_001597035.1_V1.annotation.cds_PatKP451_000147T0
Kleb_pneu_GCA_900171745.1_V1	*ST-26	1	Kleb_pneu_GCA_001597035.1_V1_PatKP451_000153T0	Kleb_pneu_GCA_001597035.1_V1.annotation.cds_PatKP451_000147T0
Kleb_pneu_GCA_900171755.1_V1	*ST-26	1	Kleb_pneu_GCA_001597035.1_V1_PatKP451_000153T0	Kleb_pneu_GCA_001597035.1_V1.annotation.cds_PatKP451_000147T0
Kleb_pneu_GCA_900171765.1_V1	*ST-26	1	Kleb_pneu_GCA_001597035.1_V1_PatKP451_000153T0	Kleb_pneu_GCA_001597035.1_V1.annotation.cds_PatKP451_000147T0
Kleb_pneu_GCA_900171775.1_V1	*ST-26	1	Kleb_pneu_GCA_001597035.1_V1_PatKP451_000153T0	Kleb_pneu_GCA_001597035.1_V1.annotation.cds_PatKP451_000147T0
Kleb_pneu_GCA_900171805.1_V1	*ST-26	1	Kleb_pneu_GCA_001597035.1_V1_PatKP451_000153T0	Kleb_pneu_GCA_001597035.1_V1.annotation.cds_PatKP451_000147T0
Kleb_pneu_GCA_900171855.1_V1	*ST-26	1	Kleb_pneu_GCA_001597035.1_V1_PatKP451_000153T0	Kleb_pneu_GCA_001597035.1_V1.annotation.cds_PatKP451_000147T0
Kleb_pneu_GCA_900171865.1_V1	*ST-26	1	Kleb_pneu_GCA_001597035.1_V1_PatKP451_000153T0	Kleb_pneu_GCA_001597035.1_V1.annotation.cds_PatKP451_000147T0
Kleb_pneu_GCA_900171885.1_V1	*ST-26	1	Kleb_pneu_GCA_001597035.1_V1_PatKP451_000153T0	Kleb_pneu_GCA_001597035.1_V1.annotation.cds_PatKP451_000147T0
Kleb_pneu_GCA_900171895.1_V1	*ST-26	1	Kleb_pneu_GCA_001597035.1_V1_PatKP451_000153T0	Kleb_pneu_GCA_001597035.1_V1.annotation.cds_PatKP451_000147T0
Kleb_pneu_GCA_900171935.1_V1	*ST-26	1	Kleb_pneu_GCA_001597035.1_V1_PatKP451_000153T0	Kleb_pneu_GCA_001597035.1_V1.annotation.cds_PatKP451_000147T0
Kleb_pneu_GCA_900171955.1_V1	*ST-26	1	Kleb_pneu_GCA_001597035.1_V1_PatKP451_000153T0	Kleb_pneu_GCA_001597035.1_V1.annotation.cds_PatKP451_000147T0
Kleb_pneu_GCA_900171995.1_V1	*ST-26	1	Kleb_pneu_GCA_001597035.1_V1_PatKP451_000153T0	Kleb_pneu_GCA_001597035.1_V1.annotation.cds_PatKP451_000147T0
Kleb_pneu_GCA_900172015.1_V1	*ST-26	1	Kleb_pneu_GCA_001597035.1_V1_PatKP451_000153T0	Kleb_pneu_GCA_001597035.1_V1.annotation.cds_PatKP451_000147T0
Kleb_pneu_GCA_900172045.1_V1	*ST-26	1	Kleb_pneu_GCA_001597035.1_V1_PatKP451_000153T0	Kleb_pneu_GCA_001597035.1_V1.annotation.cds_PatKP451_000147T0
Kleb_pneu_GCA_900172055.1_V1	*ST-26	1	Kleb_pneu_GCA_001597035.1_V1_PatKP451_000153T0	Kleb_pneu_GCA_001597035.1_V1.annotation.cds_PatKP451_000147T0
Kleb_pneu_GCA_900172125.1_V1	*ST-26	1	Kleb_pneu_GCA_001597035.1_V1_PatKP451_000153T0	Kleb_pneu_GCA_001597035.1_V1.annotation.cds_PatKP451_000147T0
Kleb_pneu_GCA_900172135.1_V1	*ST-26	1	Kleb_pneu_GCA_001597035.1_V1_PatKP451_000153T0	Kleb_pneu_GCA_001597035.1_V1.annotation.cds_PatKP451_000147T0
Kleb_pneu_GCA_900172145.1_V1	*ST-26	1	Kleb_pneu_GCA_001597035.1_V1_PatKP451_000153T0	Kleb_pneu_GCA_001597035.1_V1.annotation.cds_PatKP451_000147T0
Kleb_pneu_GCA_900172155.1_V1	*ST-26	1	Kleb_pneu_GCA_001597035.1_V1_PatKP451_000153T0	Kleb_pneu_GCA_001597035.1_V1.annotation.cds_PatKP451_000147T0
Kleb_pneu_GCA_900172175.1_V1	*ST-26	1	Kleb_pneu_GCA_001597035.1_V1_PatKP451_000153T0	Kleb_pneu_GCA_001597035.1_V1.annotation.cds_PatKP451_000147T0
Kleb_pneu_GCA_900172425.1_V1	*ST-26	1	Kleb_pneu_GCA_001597035.1_V1_PatKP451_000153T0	Kleb_pneu_GCA_001597035.1_V1.annotation.cds_PatKP451_000147T0
Kleb_pneu_GCA_900172435.1_V1	*ST-26	1	Kleb_pneu_GCA_001597035.1_V1_PatKP451_000153T0	Kleb_pneu_GCA_001597035.1_V1.annotation.cds_PatKP451_000147T0
Kleb_pneu_GCA_900172445.1_V1	*ST-26	1	Kleb_pneu_GCA_001597035.1_V1_PatKP451_000153T0	Kleb_pneu_GCA_001597035.1_V1.annotation.cds_PatKP451_000147T0
Kleb_pneu_GCA_900172455.1_V1	*ST-26	1	Kleb_pneu_GCA_001597035.1_V1_PatKP451_000153T0	Kleb_pneu_GCA_001597035.1_V1.annotation.cds_PatKP451_000147T0
Kleb_pneu_GCA_900172465.1_V1	*ST-26	1	Kleb_pneu_GCA_001597035.1_V1_PatKP451_000153T0	Kleb_pneu_GCA_001597035.1_V1.annotation.cds_PatKP451_000147T0
Kleb_pneu_GCA_900172475.1_V1	*ST-26	1	Kleb_pneu_GCA_001597035.1_V1_PatKP451_000153T0	Kleb_pneu_GCA_001597035.1_V1.annotation.cds_PatKP451_000147T0
Kleb_pneu_GCA_900172485.1_V1	*ST-26	1	Kleb_pneu_GCA_001597035.1_V1_PatKP451_000153T0	Kleb_pneu_GCA_001597035.1_V1.annotation.cds_PatKP451_000147T0
Kleb_pneu_GCA_900172495.1_V1	*ST-26	1	Kleb_pneu_GCA_001597035.1_V1_PatKP451_000153T0	Kleb_pneu_GCA_001597035.1_V1.annotation.cds_PatKP451_000147T0
Kleb_pneu_UCI114_V1	*ST-261	0
Kleb_pneu_GCA_900092865.1_V1	*ST-262	1	Kleb_pneu_GCA_900092955.1_V1_PatKP1066_000953T0	Kleb_pneu_GCA_900092955.1_V1.annotation.cds_PatKP1066_000959T0
Kleb_pneu_GCA_900092955.1_V1	*ST-262	1	Kleb_pneu_GCA_900092955.1_V1_PatKP1066_000953T0	Kleb_pneu_GCA_900092955.1_V1.annotation.cds_PatKP1066_000959T0
Kleb_pneu_GCA_900092875.1_V1	*ST-266	1	Kleb_pneu_GCA_900172985.1_V1_PatKP1222_004072T0	Kleb_pneu_subsp._pneumoniae_GCA_002247885.1.annotation.cds_PatKP1830_005121T0
Kleb_pneu_UCI_20_V1	*ST-268	0
Kleb_pneu_GCA_900084395.1_V1	*ST-27	0
Kleb_pneu_GCA_900173585.1_V1	*ST-291	2	Kleb_pneu_GCA_900173585.1_V1_PatKP1280_004043T0	Kleb_pneu_GCA_900173585.1_V1.annotation.cds_PatKP1280_004037T0
Kleb_pneu_GCA_000823045.1_V1	*ST-292	0
Kleb_pneu_GCA_002104635.1	*ST-307	0
Kleb_pneu_GCA_002167105.1	*ST-307	0
Kleb_pneu_GCA_001462535.1_V1	*ST-314	0
Kleb_pneu_GCA_002180685.1	*ST-317	0
Kleb_pneu_UCI_26_V1	*ST-322	0
Kleb_pneu_GCA_000822805.1_V1	*ST-322	1	Kleb_pneu_GCA_900084735.1_V1_PatKP859_001299T0	Kleb_pneu_GCA_900093445.1_V1.annotation.cds_PatKP1114_001216T0
Kleb_pneu_GCA_900085125.1_V1	*ST-323	0
Kleb_pneu_GCA_900173595.1_V1	*ST-325	1	Kleb_pneu_GCA_900084735.1_V1_PatKP859_001299T0	Kleb_pneu_GCA_900173605.1_V1.annotation.cds_PatKP1282_002681T0
Kleb_pneu_GCA_900173605.1_V1	*ST-325	1	Kleb_pneu_GCA_900084735.1_V1_PatKP859_001299T0	Kleb_pneu_GCA_900173605.1_V1.annotation.cds_PatKP1282_002681T0
Kleb_pneu_subsp._pneumoniae_GCA_002248105.1	*ST-337	2	Kleb_pneu_GCA_900084735.1_V1_PatKP859_001299T0	Kleb_pneu_subsp._pneumoniae_GCA_002248105.1.annotation.cds_PatKP1540_001879T0
Kleb_pneu_GCA_900084595.1_V1	*ST-34	0
Kleb_pneu_GCA_900085075.1_V1	*ST-34	0
Kleb_pneu_GCA_900085665.1_V1	*ST-34	0
Kleb_pneu_GCA_900084865.1_V1	*ST-34	1	Kleb_pneu_GCA_900084735.1_V1_PatKP859_001299T0	Kleb_pneu_GCA_900084865.1_V1.annotation.cds_PatKP872_000745T0
Kleb_pneu_UCI_34_V1	*ST-34	1	Kleb_pneu_GCA_900084735.1_V1_PatKP859_001299T0	Kleb_pneu_GCA_900085895.1_V1.annotation.cds_PatKP973_000333T0
Kleb_pneu_GCA_002186835.1	*ST-340	1	Kleb_pneu_GCA_900084735.1_V1_PatKP859_001299T0	Kleb_pneu_GCA_002752955.1.annotation.cds_PatKP1488_003395T0
Kleb_pneu_GCA_900085385.1_V1	*ST-35	2	Kleb_pneu_GCA_900093295.1_V1_PatKP1099_003481T0	Kleb_pneu_GCA_900085385.1_V1.annotation.cds_PatKP922_000816T0
Kleb_pneu_GCA_001678695.1_V1	*ST-36	0
Kleb_pneu_GCA_002182575.1	*ST-36	0
Kleb_pneu_GCA_900172185.1_V1	*ST-364	1	Kleb_pneu_GCA_900172185.1_V1_PatKP1165_000629T0	Kleb_pneu_GCA_900172185.1_V1.annotation.cds_PatKP1165_000623T0
Kleb_pneu_GCA_900084655.1_V1	*ST-37	0
Kleb_pneu_MGH166_V1	*ST-37	0
Kleb_pneu_BIDMC_46b_V1	*ST-372	0
Kleb_pneu_GCA_900084305.1_V1	*ST-372	0
Kleb_pneu_GCA_001457255.1_V1	*ST-40	0
Kleb_pneu_GCA_001457265.1_V1	*ST-40	0
Kleb_pneu_GCA_001457275.1_V1	*ST-40	0
Kleb_pneu_GCA_001457285.1_V1	*ST-40	0
Kleb_pneu_GCA_001457335.1_V1	*ST-40	0
Kleb_pneu_GCA_001460475.1_V1	*ST-40	0
Kleb_pneu_GCA_001460495.1_V1	*ST-40	0
Kleb_pneu_GCA_001460565.1_V1	*ST-40	0
Kleb_pneu_GCA_001460975.1_V1	*ST-40	0
Kleb_pneu_GCA_001460985.1_V1	*ST-40	0
Kleb_pneu_GCA_900176825.1	*ST-419	0
Kleb_pneu_UCICRE-134	*ST-420	0
Kleb_pneu_GCA_001720645.1_V1	*ST-420	1	Kleb_pneu_GCA_900093295.1_V1_PatKP1099_003481T0	Kleb_pneu_GCA_900093295.1_V1.annotation.cds_PatKP1099_003487T0
Kleb_pneu_subsp._pneumoniae_GCA_900180605.1	*ST-423	0
Kleb_pneu_subsp._pneumoniae_GCA_900180845.1	*ST-423	0
Kleb_pneu_subsp._pneumoniae_GCA_900181685.1	*ST-423	0
Kleb_pneu_subsp._pneumoniae_GCA_900181725.1	*ST-423	0
Kleb_pneu_subsp._pneumoniae_GCA_900181745.1	*ST-423	0
Kleb_pneu_subsp._pneumoniae_GCA_900181775.1	*ST-423	0
Kleb_pneu_subsp._pneumoniae_GCA_900181825.1	*ST-423	0
Kleb_pneu_NB60_GCA_000565135.1_V1	*ST-43	0
Kleb_pneu_GCA_002188105.1	*ST-465	1	Kleb_pneu_GCA_002188105.1_PatKP1396_002805T0	Kleb_pneu_GCA_002188105.1.annotation.cds_PatKP1396_002811T0 Kleb_pneu_GCA_002188105.1.annotation.cds_PatKP1396_002812T0
Kleb_pneu_GCA_900173885.1_V1	*ST-470	0
Kleb_pneu_GCA_900173985.1_V1	*ST-470	0
Kleb_pneu_GCA_900173995.1_V1	*ST-470	0
Kleb_pneu_GCA_900174005.1_V1	*ST-470	0
Kleb_pneu_GCA_900175115.1_V1	*ST-470	0
Kleb_pneu_subsp._pneumoniae_GCA_900182075.1	*ST-474	1	Kleb_pneu_GCA_900084735.1_V1_PatKP859_001299T0	Kleb_pneu_GCA_900093445.1_V1.annotation.cds_PatKP1114_001216T0
Kleb_pneu_JT4_GCA_000809125.1_V1	*ST-474	1	Kleb_pneu_JT4_GCA_000809125.1_V1_PatKP162_004361T0	Kleb_pneu_JT4_GCA_000809125.1_V1.annotation.cds_PatKP162_004367T0
Kleb_pneu_GCA_900172005.1_V1	*ST-48	0
Kleb_pneu_GCA_900086405.1_V1	*ST-490	0
Kleb_pneu_GCA_900092725.1_V1	*ST-491	0
Kleb_pneu_subsp._pneumoniae_GCA_900181035.1	*ST-494	2	Kleb_pneu_GCA_002180315.1_PatKP2272_001056T0	Kleb_pneu_subsp._pneumoniae_GCA_900181035.1.annotation.cds_PatKP1572_003378T0
Kleb_pneu_subsp._pneumoniae_GCA_900182215.1	*ST-494	2	Kleb_pneu_GCA_002180315.1_PatKP2272_001056T0	Kleb_pneu_subsp._pneumoniae_GCA_900181035.1.annotation.cds_PatKP1572_003378T0
Kleb_pneu_GCA_000783515.1_V1	*ST-495	0
Kleb_pneu_GCA_002186505.1	*ST-495	0
Kleb_pneu_GCA_002186585.1	*ST-495	0
Kleb_pneu_GCA_900085135.1_V1	*ST-502	0
Kleb_pneu_GCA_002235765.1	*ST-512	0
Kleb_pneu_GCA_900092715.1_V1	*ST-515	0
Kleb_pneu_GCA_002416895.1	*ST-520	1	Kleb_pneu_GCA_002180315.1_PatKP2272_001056T0	Kleb_pneu_GCA_002417145.1.annotation.cds_PatKP2095_001019T0
Kleb_pneu_GCA_002417075.1	*ST-520	1	Kleb_pneu_GCA_002180315.1_PatKP2272_001056T0	Kleb_pneu_GCA_002417145.1.annotation.cds_PatKP2095_001019T0
Kleb_pneu_GCA_002417145.1	*ST-520	1	Kleb_pneu_GCA_002180315.1_PatKP2272_001056T0	Kleb_pneu_GCA_002417145.1.annotation.cds_PatKP2095_001019T0
Kleb_pneu_GCA_002184745.1	*ST-524	0
Kleb_pneu_GCA_002411925.1	*ST-530	0
Kleb_pneu_GCA_001901825.1_V1	*ST-551	1		Kleb_pneu_GCA_001901825.1_V1.annotation.cds_PatKP624_000008T0
Kleb_pneu_GCA_002211125.1	*ST-555	2	Kleb_pneu_GCA_002180315.1_PatKP2272_001056T0	Kleb_pneu_GCA_002180315.1.annotation.cds_PatKP2272_001050T0
Kleb_pneu_GCA_900174245.1_V1	*ST-558	0
Kleb_pneu_MGH112_V1	*ST-560	0
Kleb_pneu_GCA_001063525.1_V1	*ST-562	0
Kleb_pneu_MGH252	*ST-580	1	Kleb_pneu_GCA_900084735.1_V1_PatKP859_001299T0	Kleb_pneu_GCA_900085895.1_V1.annotation.cds_PatKP973_000333T0
Kleb_pneu_GCA_002186935.1	*ST-586	0
Kleb_pneu_GCA_002188255.1	*ST-586	0
Kleb_pneu_GCA_900085355.1_V1	*ST-586	0
Kleb_pneu_BIDMC_52_V1	*ST-628	0
Kleb_pneu_GCA_002103595.1	*ST-634	0
Kleb_pneu_GCA_900171845.1_V1	*ST-634	2	Kleb_pneu_GCA_900171845.1_V1_PatKP1131_001701T0	Kleb_pneu_GCA_900171845.1_V1.annotation.cds_PatKP1131_001707T0
Kleb_pneu_GCA_001720625.1_V1	*ST-65	0
Kleb_pneu_GCA_900084585.1_V1	*ST-652	0
Kleb_pneu_GCA_900093055.1_V1	*ST-659	0
Kleb_pneu_GCA_900084275.1_V1	*ST-676	2	Kleb_pneu_subsp._pneumoniae_GCA_900180835.1_PatKP1697_001737T0	Kleb_pneu_subsp._pneumoniae_GCA_900180835.1.annotation.cds_PatKP1697_001743T0
Kleb_pneu_GCA_900085575.1_V1	*ST-676	2	Kleb_pneu_subsp._pneumoniae_GCA_900180835.1_PatKP1697_001737T0	Kleb_pneu_subsp._pneumoniae_GCA_900180835.1.annotation.cds_PatKP1697_001743T0
Kleb_pneu_subsp._pneumoniae_GCA_900180595.1	*ST-676	2	Kleb_pneu_subsp._pneumoniae_GCA_900180835.1_PatKP1697_001737T0	Kleb_pneu_subsp._pneumoniae_GCA_900180835.1.annotation.cds_PatKP1697_001743T0
Kleb_pneu_GCA_900174025.1_V1	*ST-694	0
Kleb_pneu_subsp._pneumoniae_GCA_000784945.1_V1	*ST-694	0
Kleb_pneu_GCA_000822965.1_V1	*ST-70	1		Kleb_pneu_GCA_000822965.1_V1.annotation.cds_PatKP232_003235T0
Kleb_pneu_GCA_001901755.1_V1	*ST-711	0
Kleb_pneu_subsp._pneumoniae_GCA_002248585.1	*ST-719	0
Kleb_pneu_GCA_000822425.1_V1	*ST-722	0
Kleb_pneu_UCI_60_V1	*ST-728	1	Kleb_pneu_GCA_900084735.1_V1_PatKP859_001299T0	Kleb_pneu_GCA_001460505.1_V1.annotation.cds_PatKP342_002112T0
Kleb_pneu_GCA_001952835.1_V1	*ST-730	0
Kleb_pneu_GCA_001701765.1_V1	*ST-730	1
Kleb_pneu_GCA_000822225.1_V1	*ST-732	1		Kleb_pneu_subsp._pneumoniae_GCA_002247885.1.annotation.cds_PatKP1830_005121T0
Kleb_pneu_GCA_002248135.1	*ST-752	0
Kleb_pneu_GCA_900084385.1_V1	*ST-759	1	Kleb_pneu_GCA_900084735.1_V1_PatKP859_001299T0	Kleb_pneu_GCA_900084385.1_V1.annotation.cds_PatKP826_003549T0
Kleb_pneu_GCA_900085065.1_V1	*ST-784	0
Kleb_pneu_subsp._pneumoniae_GCA_900180525.1	*ST-784	0
Kleb_pneu_BIDMC_24_V1	*ST-797	0
Kleb_pneu_GCA_900171925.1_V1	*ST-799	0
Kleb_pneu_subsp._pneumoniae_GCA_002247865.1	*ST-831	1	Kleb_pneu_subsp._pneumoniae_GCA_002247865.1_PatKP1768_001928T0	Kleb_pneu_subsp._pneumoniae_GCA_002247885.1.annotation.cds_PatKP1830_005121T0
Kleb_pneu_subsp._pneumoniae_GCA_002247885.1	*ST-831	1	Kleb_pneu_subsp._pneumoniae_GCA_002247885.1_PatKP1830_003550T0	Kleb_pneu_subsp._pneumoniae_GCA_002247885.1.annotation.cds_PatKP1830_005121T0
Kleb_pneu_GCA_002416655.1	*ST-849	0
Kleb_pneu_GCA_002417105.1	*ST-849	0
Kleb_pneu_GCA_002417155.1	*ST-849	0
Kleb_pneu_GCA_002417305.1	*ST-849	0
Kleb_pneu_GCA_002417325.1	*ST-849	0
Kleb_pneu_GCA_002417385.1	*ST-849	0
Kleb_pneu_UCI164	*ST-849	0
Kleb_pneu_GCA_900084255.1_V1	*ST-874	0
Kleb_pneu_GCA_900084285.1_V1	*ST-874	0
Kleb_pneu_GCA_900084435.1_V1	*ST-874	0
Kleb_pneu_GCA_900084455.1_V1	*ST-874	0
Kleb_pneu_GCA_900084565.1_V1	*ST-874	0
Kleb_pneu_GCA_900084955.1_V1	*ST-874	0
Kleb_pneu_GCA_900085005.1_V1	*ST-874	0
Kleb_pneu_GCA_900085085.1_V1	*ST-874	0
Kleb_pneu_GCA_900085225.1_V1	*ST-874	0
Kleb_pneu_GCA_900085245.1_V1	*ST-874	0
Kleb_pneu_GCA_900086075.1_V1	*ST-874	0
Kleb_pneu_GCA_900086135.1_V1	*ST-874	0
Kleb_pneu_GCA_900086345.1_V1	*ST-874	0
Kleb_pneu_GCA_900086425.1_V1	*ST-874	0
Kleb_pneu_GCA_001721565.1_V1	*ST-876	0
Kleb_pneu_GCA_900085335.1_V1	*ST-887	1	Kleb_pneu_GCA_900084735.1_V1_PatKP859_001299T0	Kleb_pneu_GCA_900093445.1_V1.annotation.cds_PatKP1114_001216T0
Kleb_pneu_GCA_900172525.1_V1	*ST-891	1	Kleb_pneu_GCA_900084735.1_V1_PatKP859_001299T0	Kleb_pneu_GCA_900172525.1_V1.annotation.cds_PatKP1176_003668T0
Kleb_pneu_MGH211	*ST-909	0
Kleb_pneu_BIDMC96_V1	*ST-927	0
Kleb_pneu_GCA_900093335.1_V1	*ST-945	1	Kleb_pneu_GCA_900084735.1_V1_PatKP859_001299T0	Kleb_pneu_GCA_900093335.1_V1.annotation.cds_PatKP1103_001714T0
Kleb_pneu_subsp._pneumoniae_GCA_002247665.1	*ST-950	0
Kleb_pneu_GCA_002187395.1	*ST-957	2	Kleb_pneu_GCA_002180315.1_PatKP2272_001056T0	Kleb_pneu_GCA_002187395.1.annotation.cds_PatKP1681_000324T0
Kleb_pneu_GCA_002188075.1	*ST-957	2	Kleb_pneu_GCA_002180315.1_PatKP2272_001056T0	Kleb_pneu_GCA_002187395.1.annotation.cds_PatKP1681_000324T0
Kleb_pneu_GCA_900092995.1_V1	*ST-963	0
Kleb_pneu_GCA_900093325.1_V1	*ST-969	0
Kleb_pneu_GCA_002257965.1	*ST-983	0
Kleb_pneu_GCA_002258005.1	*ST-983	0
Kleb_pneu_GCA_900084645.1_V1	*ST-983	0
Kleb_pneu_GCA_900172555.1_V1	*ST-983	0
Kleb_pneu_GCA_900173015.1_V1	*ST-983	0
Kleb_pneu_GCA_900173025.1_V1	*ST-983	0
Kleb_pneu_GCA_900173045.1_V1	*ST-983	0
Kleb_pneu_GCA_900173065.1_V1	*ST-983	0
Kleb_pneu_GCA_900173505.1_V1	*ST-983	0
Kleb_pneu_GCA_900173525.1_V1	*ST-983	0
Kleb_pneu_GCA_900173545.1_V1	*ST-983	0
Kleb_pneu_GCA_900175095.1_V1	*ST-983	0
Kleb_pneu_GCA_900175125.1_V1	*ST-983	0
Kleb_pneu_GCA_000821705.1_V1	*ST-985	0
Kleb_pneu_MGH_19_V1	*ST-988	0
Kleb_pneu_GCA_002181635.1	*ST-99	1	Kleb_pneu_GCA_002181635.1_PatKP2344_002500T0	Kleb_pneu_GCA_002181635.1.annotation.cds_PatKP2344_002494T0
Kleb_pneu_GCA_002187615.1	*ST-993	0
Kleb_pneu_GCA_001701625.1_V1	*ST-994	1	Kleb_pneu_GCA_900084735.1_V1_PatKP859_001299T0	Kleb_pneu_GCA_001701625.1_V1.annotation.cds_PatKP520_000458T0
Kleb_pneu_GCA_001062915.1_V1	*ST-999	2	Kleb_pneu_GCA_001062915.1_V1_PatKP277_002732T0	Kleb_pneu_GCA_001062915.1_V1.annotation.cds_PatKP277_002726T0
Kleb_pneu_GCA_001874695.1_V1	ST-1	0
Kleb_pneu_GCA_001887995.1_V1	ST-1	0
Kleb_pneu_GCA_002108315.1	ST-1	0
Kleb_pneu_GCA_002108345.1	ST-1	0
Kleb_pneu_GCA_002257785.1	ST-1	0
Kleb_pneu_GCA_900084195.1_V1	ST-1	0
Kleb_pneu_GCA_900084335.1_V1	ST-1	0
Kleb_pneu_GCA_900084935.1_V1	ST-1	0
Kleb_pneu_GCA_900084985.1_V1	ST-1	0
Kleb_pneu_GCA_900086125.1_V1	ST-1	0
Kleb_pneu_GCA_900086145.1_V1	ST-1	0
Kleb_pneu_subsp._pneumoniae_GCA_002248115.1	ST-1	0
Kleb_pneu_BWH_2_V1	ST-101	0
Kleb_pneu_GCA_001463615.1_V1	ST-101	0
Kleb_pneu_GCA_001720745.1_V1	ST-101	0
Kleb_pneu_GCA_001720815.1_V1	ST-101	0
Kleb_pneu_GCA_001902435.1_V1	ST-101	0
Kleb_pneu_GCA_001902515.1_V1	ST-101	0
Kleb_pneu_GCA_001913175.1_V1	ST-101	0
Kleb_pneu_GCA_002093155.1_V1	ST-101	0
Kleb_pneu_GCA_002187295.1	ST-101	0
Kleb_pneu_GCA_002187855.1	ST-101	0
Kleb_pneu_GCA_002189245.1	ST-101	0
Kleb_pneu_GCA_002189255.1	ST-101	0
Kleb_pneu_GCA_002189265.1	ST-101	0
Kleb_pneu_GCA_002189305.1	ST-101	0
Kleb_pneu_GCA_002189335.1	ST-101	0
Kleb_pneu_GCA_002235835.1	ST-101	0
Kleb_pneu_GCA_002248525.1	ST-101	0
Kleb_pneu_GCA_002411715.1	ST-101	0
Kleb_pneu_GCA_002417245.1	ST-101	0
Kleb_pneu_GCA_900084345.1_V1	ST-101	0
Kleb_pneu_GCA_900084605.1_V1	ST-101	0
Kleb_pneu_GCA_900084825.1_V1	ST-101	0
Kleb_pneu_GCA_900084885.1_V1	ST-101	0
Kleb_pneu_GCA_900085505.1_V1	ST-101	0
Kleb_pneu_GCA_900085925.1_V1	ST-101	0
Kleb_pneu_GCA_900086245.1_V1	ST-101	0
Kleb_pneu_GCA_900086355.1_V1	ST-101	0
Kleb_pneu_GCA_900086465.1_V1	ST-101	0
Kleb_pneu_GCA_900086505.1_V1	ST-101	0
Kleb_pneu_GCA_900092695.1_V1	ST-101	0
Kleb_pneu_GCA_900093165.1_V1	ST-101	0
Kleb_pneu_subsp._pneumoniae_GCA_001316495.2_V1	ST-101	0
Kleb_pneu_subsp._pneumoniae_GCA_001316565.2_V1	ST-101	0
Kleb_pneu_subsp._pneumoniae_GCA_001316645.2_V1	ST-101	0
Kleb_pneu_subsp._pneumoniae_GCA_001316695.2_V1	ST-101	0
Kleb_pneu_subsp._pneumoniae_GCA_001316745.2_V1	ST-101	0
Kleb_pneu_subsp._pneumoniae_GCA_001316785.2_V1	ST-101	0
Kleb_pneu_subsp._pneumoniae_GCA_001316895.2_V1	ST-101	0
Kleb_pneu_subsp._pneumoniae_GCA_001316955.2_V1	ST-101	0
Kleb_pneu_subsp._pneumoniae_GCA_001316985.2_V1	ST-101	0
Kleb_pneu_subsp._pneumoniae_GCA_001317005.2_V1	ST-101	0
Kleb_pneu_subsp._pneumoniae_GCA_001317015.2_V1	ST-101	0
Kleb_pneu_subsp._pneumoniae_GCA_001317035.2_V1	ST-101	0
Kleb_pneu_subsp._pneumoniae_GCA_001317165.2_V1	ST-101	0
Kleb_pneu_subsp._pneumoniae_GCA_001317295.2_V1	ST-101	0
Kleb_pneu_subsp._pneumoniae_GCA_001317375.2_V1	ST-101	0
Kleb_pneu_subsp._pneumoniae_GCA_002246235.1	ST-101	0
Kleb_pneu_subsp._pneumoniae_GCA_002246245.1	ST-101	0
Kleb_pneu_subsp._pneumoniae_GCA_002246635.1	ST-101	0
Kleb_pneu_subsp._pneumoniae_GCA_002247645.1	ST-101	0
Kleb_pneu_subsp._pneumoniae_GCA_002744555.1	ST-1015	0
Kleb_pneu_BWH_78	ST-1017	0
Kleb_pneu_GCA_002186895.1	ST-1035	0
Kleb_pneu_UCI106_V1	ST-1037	1	Kleb_pneu_GCA_900084735.1_V1_PatKP859_001299T0	Kleb_pneu_GCA_900093335.1_V1.annotation.cds_PatKP1103_001714T0
Kleb_pneu_BIDMC_55_V1	ST-105	0
Kleb_pneu_GCA_000735285.1_V1	ST-105	0
Kleb_pneu_subsp._pneumoniae_GCA_002248635.1	ST-105	0
Kleb_pneu_GCA_002261585.1	ST-107	0
Kleb_Pneu_UCI92_V1	ST-107	0
Kleb_pneu_GCA_002187255.1	ST-108	0
Kleb_pneu_GCA_002271335.1	ST-1082	2	Kleb_pneu_GCA_002180315.1_PatKP2272_001056T0	Kleb_pneu_GCA_002271335.1.annotation.cds_PatKP1383_003990T0
Kleb_pneu_MGH_45_V1	ST-1084	0
Kleb_pneu_ATCC_BAA-2146_GCA_000349285.2_V1	ST-11	0
Kleb_pneu_GCA_000364385.3_V1	ST-11	0
Kleb_pneu_GCA_000722485.1_V1	ST-11	0
Kleb_pneu_GCA_000826605.1_V1	ST-11	0
Kleb_pneu_GCA_001022035.1_V1	ST-11	0
Kleb_pneu_GCA_001462735.1_V1	ST-11	0
Kleb_pneu_GCA_001462965.1_V1	ST-11	0
Kleb_pneu_GCA_001463125.1_V1	ST-11	0
Kleb_pneu_GCA_001463605.1_V1	ST-11	0
Kleb_pneu_GCA_001613565.1_V1	ST-11	0
Kleb_pneu_GCA_001613575.1_V1	ST-11	0
Kleb_pneu_GCA_001613585.1_V1	ST-11	0
Kleb_pneu_GCA_001613595.1_V1	ST-11	0
Kleb_pneu_GCA_001613645.1_V1	ST-11	0
Kleb_pneu_GCA_001613655.1_V1	ST-11	0
Kleb_pneu_GCA_001613665.1_V1	ST-11	0
Kleb_pneu_GCA_001613715.1_V1	ST-11	0
Kleb_pneu_GCA_001647475.1_V1	ST-11	0
Kleb_pneu_GCA_001701495.1_V1	ST-11	0
Kleb_pneu_GCA_001701835.1_V1	ST-11	0
Kleb_pneu_GCA_001701895.1_V1	ST-11	0
Kleb_pneu_GCA_001720755.1_V1	ST-11	0
Kleb_pneu_GCA_001720765.1_V1	ST-11	0
Kleb_pneu_GCA_001720865.1_V1	ST-11	0
Kleb_pneu_GCA_001856585.1_V1	ST-11	0
Kleb_pneu_GCA_001856605.1_V1	ST-11	0
Kleb_pneu_GCA_001866785.1_V1	ST-11	0
Kleb_pneu_GCA_001879395.1_V1	ST-11	0
Kleb_pneu_GCA_001879405.1_V1	ST-11	0
Kleb_pneu_GCA_001879415.1_V1	ST-11	0
Kleb_pneu_GCA_001887985.1_V1	ST-11	0
Kleb_pneu_GCA_001901855.1_V1	ST-11	0
Kleb_pneu_GCA_001902415.1_V1	ST-11	0
Kleb_pneu_GCA_001902475.1_V1	ST-11	0
Kleb_pneu_GCA_001902755.1_V1	ST-11	0
Kleb_pneu_GCA_001902775.1_V1	ST-11	0
Kleb_pneu_GCA_001902955.1_V1	ST-11	0
Kleb_pneu_GCA_001903035.1_V1	ST-11	0
Kleb_pneu_GCA_001903335.1_V1	ST-11	0
Kleb_pneu_GCA_001903975.1_V1	ST-11	0
Kleb_pneu_GCA_001904405.1_V1	ST-11	0
Kleb_pneu_GCA_001904475.1_V1	ST-11	0
Kleb_pneu_GCA_001908895.1_V1	ST-11	0
Kleb_pneu_GCA_001922465.1_V1	ST-11	0
Kleb_pneu_GCA_001939845.1_V1	ST-11	0
Kleb_pneu_GCA_002009075.1_V1	ST-11	0
Kleb_pneu_GCA_002113865.1	ST-11	0
Kleb_pneu_GCA_002164605.1	ST-11	0
Kleb_pneu_GCA_002164675.1	ST-11	0
Kleb_pneu_GCA_002164755.1	ST-11	0
Kleb_pneu_GCA_002164835.1	ST-11	0
Kleb_pneu_GCA_002164855.1	ST-11	0
Kleb_pneu_GCA_002164875.1	ST-11	0
Kleb_pneu_GCA_002180175.1	ST-11	0
Kleb_pneu_GCA_002185355.1	ST-11	0
Kleb_pneu_GCA_002185405.1	ST-11	0
Kleb_pneu_GCA_002185965.1	ST-11	0
Kleb_pneu_GCA_002186205.1	ST-11	0
Kleb_pneu_GCA_002189385.1	ST-11	0
Kleb_pneu_GCA_002189415.1	ST-11	0
Kleb_pneu_GCA_002202255.1	ST-11	0
Kleb_pneu_GCA_002209465.1	ST-11	0
Kleb_pneu_GCA_002234895.1	ST-11	0
Kleb_pneu_GCA_002250985.1	ST-11	0
Kleb_pneu_GCA_002257765.1	ST-11	0
Kleb_pneu_GCA_002257845.1	ST-11	0
Kleb_pneu_GCA_002257925.1	ST-11	0
Kleb_pneu_GCA_002258015.1	ST-11	0
Kleb_pneu_GCA_002258045.1	ST-11	0
Kleb_pneu_GCA_002258055.1	ST-11	0
Kleb_pneu_GCA_002258115.1	ST-11	0
Kleb_pneu_GCA_002258145.1	ST-11	0
Kleb_pneu_GCA_002261545.1	ST-11	0
Kleb_pneu_GCA_002261575.1	ST-11	0
Kleb_pneu_GCA_002261625.1	ST-11	0
Kleb_pneu_GCA_002261655.1	ST-11	0
Kleb_pneu_GCA_002261665.1	ST-11	0
Kleb_pneu_GCA_002261675.1	ST-11	0
Kleb_pneu_GCA_002261685.1	ST-11	0
Kleb_pneu_GCA_002261735.1	ST-11	0
Kleb_pneu_GCA_002261745.1	ST-11	0
Kleb_pneu_GCA_002261775.1	ST-11	0
Kleb_pneu_GCA_002261785.1	ST-11	0
Kleb_pneu_GCA_002261825.1	ST-11	0
Kleb_pneu_GCA_002261875.1	ST-11	0
Kleb_pneu_GCA_002261935.1	ST-11	0
Kleb_pneu_GCA_002261945.1	ST-11	0
Kleb_pneu_GCA_002261975.1	ST-11	0
Kleb_pneu_GCA_002261985.1	ST-11	0
Kleb_pneu_GCA_002262035.1	ST-11	0
Kleb_pneu_GCA_002262055.1	ST-11	0
Kleb_pneu_GCA_002262065.1	ST-11	0
Kleb_pneu_GCA_002262075.1	ST-11	0
Kleb_pneu_GCA_002262115.1	ST-11	0
Kleb_pneu_GCA_002262135.1	ST-11	0
Kleb_pneu_GCA_002262145.1	ST-11	0
Kleb_pneu_GCA_002262175.1	ST-11	0
Kleb_pneu_GCA_002262185.1	ST-11	0
Kleb_pneu_GCA_002262215.1	ST-11	0
Kleb_pneu_GCA_002262225.1	ST-11	0
Kleb_pneu_GCA_002262235.1	ST-11	0
Kleb_pneu_GCA_002262275.1	ST-11	0
Kleb_pneu_GCA_002262295.1	ST-11	0
Kleb_pneu_GCA_002262305.1	ST-11	0
Kleb_pneu_GCA_002262335.1	ST-11	0
Kleb_pneu_GCA_002262345.1	ST-11	0
Kleb_pneu_GCA_002262375.1	ST-11	0
Kleb_pneu_GCA_002262385.1	ST-11	0
Kleb_pneu_GCA_002262415.1	ST-11	0
Kleb_pneu_GCA_002262425.1	ST-11	0
Kleb_pneu_GCA_002262455.1	ST-11	0
Kleb_pneu_GCA_002262465.1	ST-11	0
Kleb_pneu_GCA_002262475.1	ST-11	0
Kleb_pneu_GCA_002262485.1	ST-11	0
Kleb_pneu_GCA_002262535.1	ST-11	0
Kleb_pneu_GCA_002262545.1	ST-11	0
Kleb_pneu_GCA_002262555.1	ST-11	0
Kleb_pneu_GCA_002262565.1	ST-11	0
Kleb_pneu_GCA_002262615.1	ST-11	0
Kleb_pneu_GCA_002262625.1	ST-11	0
Kleb_pneu_GCA_002262635.1	ST-11	0
Kleb_pneu_GCA_002262675.1	ST-11	0
Kleb_pneu_GCA_002262705.1	ST-11	0
Kleb_pneu_GCA_002262735.1	ST-11	0
Kleb_pneu_GCA_002262745.1	ST-11	0
Kleb_pneu_GCA_002262775.1	ST-11	0
Kleb_pneu_GCA_002262795.1	ST-11	0
Kleb_pneu_GCA_002262805.1	ST-11	0
Kleb_pneu_GCA_002262855.1	ST-11	0
Kleb_pneu_GCA_002264245.1	ST-11	0
Kleb_pneu_GCA_002264265.1	ST-11	0
Kleb_pneu_GCA_002264315.1	ST-11	0
Kleb_pneu_GCA_002264365.1	ST-11	0
Kleb_pneu_GCA_002264465.1	ST-11	0
Kleb_pneu_GCA_002264475.1	ST-11	0
Kleb_pneu_GCA_002264505.1	ST-11	0
Kleb_pneu_GCA_002264525.1	ST-11	0
Kleb_pneu_GCA_002264545.1	ST-11	0
Kleb_pneu_GCA_002264605.1	ST-11	0
Kleb_pneu_GCA_002264645.1	ST-11	0
Kleb_pneu_GCA_002264685.1	ST-11	0
Kleb_pneu_GCA_002264695.1	ST-11	0
Kleb_pneu_GCA_002264705.1	ST-11	0
Kleb_pneu_GCA_002264715.1	ST-11	0
Kleb_pneu_GCA_002264765.1	ST-11	0
Kleb_pneu_GCA_002264775.1	ST-11	0
Kleb_pneu_GCA_002264785.1	ST-11	0
Kleb_pneu_GCA_002264795.1	ST-11	0
Kleb_pneu_GCA_002264855.1	ST-11	0
Kleb_pneu_GCA_002264925.1	ST-11	0
Kleb_pneu_GCA_002265015.1	ST-11	0
Kleb_pneu_GCA_002265425.1	ST-11	0
Kleb_pneu_GCA_002265525.1	ST-11	0
Kleb_pneu_GCA_002265565.1	ST-11	0
Kleb_pneu_GCA_002265605.1	ST-11	0
Kleb_pneu_GCA_002269295.1	ST-11	0
Kleb_pneu_GCA_002278055.1	ST-11	0
Kleb_pneu_GCA_002295145.1	ST-11	0
Kleb_pneu_GCA_002295185.1	ST-11	0
Kleb_pneu_GCA_002300725.1	ST-11	0
Kleb_pneu_GCA_002300765.1	ST-11	0
Kleb_pneu_GCA_002369875.1	ST-11	0
Kleb_pneu_GCA_002369905.1	ST-11	0
Kleb_pneu_GCA_002370055.1	ST-11	0
Kleb_pneu_GCA_002370065.1	ST-11	0
Kleb_pneu_GCA_002587165.1	ST-11	0
Kleb_pneu_GCA_002610865.1	ST-11	0
Kleb_pneu_GCA_002610925.1	ST-11	0
Kleb_pneu_GCA_002610935.1	ST-11	0
Kleb_pneu_GCA_002610945.1	ST-11	0
Kleb_pneu_GCA_002636515.1	ST-11	0
Kleb_pneu_GCA_002751155.1	ST-11	0
Kleb_pneu_GCA_002751175.1	ST-11	0
Kleb_pneu_GCA_002751185.1	ST-11	0
Kleb_pneu_GCA_002751195.1	ST-11	0
Kleb_pneu_GCA_002751235.1	ST-11	0
Kleb_pneu_GCA_002751295.1	ST-11	0
Kleb_pneu_GCA_002751315.1	ST-11	0
Kleb_pneu_GCA_002751325.1	ST-11	0
Kleb_pneu_GCA_002751355.1	ST-11	0
Kleb_pneu_GCA_002751375.1	ST-11	0
Kleb_pneu_GCA_002751385.1	ST-11	0
Kleb_pneu_GCA_002751415.1	ST-11	0
Kleb_pneu_GCA_002751425.1	ST-11	0
Kleb_pneu_GCA_002751435.1	ST-11	0
Kleb_pneu_GCA_002751485.1	ST-11	0
Kleb_pneu_GCA_002751675.1	ST-11	0
Kleb_pneu_GCA_002751705.1	ST-11	0
Kleb_pneu_GCA_002751715.1	ST-11	0
Kleb_pneu_GCA_002759035.1	ST-11	0
Kleb_pneu_GCA_900084155.1_V1	ST-11	0
Kleb_pneu_GCA_900084355.1_V1	ST-11	0
Kleb_pneu_GCA_900084365.1_V1	ST-11	0
Kleb_pneu_GCA_900084375.1_V1	ST-11	0
Kleb_pneu_GCA_900084475.1_V1	ST-11	0
Kleb_pneu_GCA_900084855.1_V1	ST-11	0
Kleb_pneu_GCA_900085295.1_V1	ST-11	0
Kleb_pneu_GCA_900086285.1_V1	ST-11	0
Kleb_pneu_GCA_900086545.1_V1	ST-11	0
Kleb_pneu_GCA_900092685.1_V1	ST-11	0
Kleb_pneu_GCA_900092735.1_V1	ST-11	0
Kleb_pneu_GCA_900092785.1_V1	ST-11	0
Kleb_pneu_GCA_900092905.1_V1	ST-11	0
Kleb_pneu_GCA_900093215.1_V1	ST-11	0
Kleb_pneu_JM45_GCA_000445405.1_V1	ST-11	0
Kleb_pneu_MGH_69_V1	ST-11	0
Kleb_pneu_subsp._pneumoniae_GCA_001645745.1_V1	ST-11	0
Kleb_pneu_subsp._pneumoniae_GCA_002248435.1	ST-11	0
Kleb_pneu_subsp._pneumoniae_GCA_002248545.1	ST-11	0
Kleb_pneu_subsp._pneumoniae_HS11286_GCA_000240185.2_V1	ST-11	0
Kleb_pneu_GCA_002751755.1	ST-11	1
Kleb_pneu_GCA_001441285.1_V1	ST-11	1	Kleb_pneu_GCA_001441285.1_V1_PatKP329_004911T0	Kleb_pneu_GCA_001441285.1_V1.annotation.cds_PatKP329_004905T0
Kleb_pneu_GCA_900085415.1_V1	ST-111	1	Kleb_pneu_GCA_002180315.1_PatKP2272_001056T0	Kleb_pneu_GCA_001482345.1_V1.annotation.cds_PatKP387_004818T0
Kleb_pneu_BIDMC_23_V1	ST-111	2	Kleb_pneu_GCA_002180315.1_PatKP2272_001056T0	Kleb_pneu_GCA_001482345.1_V1.annotation.cds_PatKP387_004818T0
Kleb_pneu_GCA_001482345.1_V1	ST-111	2	Kleb_pneu_GCA_002180315.1_PatKP2272_001056T0	Kleb_pneu_GCA_001482345.1_V1.annotation.cds_PatKP387_004818T0
Kleb_pneu_GCA_001945475.1_V1	ST-111	2	Kleb_pneu_GCA_002180315.1_PatKP2272_001056T0	Kleb_pneu_GCA_001482345.1_V1.annotation.cds_PatKP387_004818T0
Kleb_pneu_MGH_21_V1	ST-111	2	Kleb_pneu_GCA_002180315.1_PatKP2272_001056T0	Kleb_pneu_GCA_001482345.1_V1.annotation.cds_PatKP387_004818T0
Kleb_pneu_MGH_32_V1	ST-111	2	Kleb_pneu_GCA_002180315.1_PatKP2272_001056T0	Kleb_pneu_GCA_001482345.1_V1.annotation.cds_PatKP387_004818T0
Kleb_pneu_MGH116_V1	ST-111	2	Kleb_pneu_GCA_002180315.1_PatKP2272_001056T0	Kleb_pneu_GCA_001482345.1_V1.annotation.cds_PatKP387_004818T0
Kleb_pneu_MGH84_V1	ST-111	2	Kleb_pneu_GCA_002180315.1_PatKP2272_001056T0	Kleb_pneu_GCA_001482345.1_V1.annotation.cds_PatKP387_004818T0
Kleb_pneu_MRSN_3852_GCA_000982205.1_V1	ST-111	2	Kleb_pneu_GCA_002180315.1_PatKP2272_001056T0	Kleb_pneu_GCA_001482345.1_V1.annotation.cds_PatKP387_004818T0
Kleb_pneu_7699_GCA_000699425.1_V1	ST-1123	0
Kleb_pneu_4541-2_GCA_000699325.1_V1	ST-1125	0
Kleb_pneu_BWH_15_V1	ST-113	1	Kleb_pneu_GCA_900172985.1_V1_PatKP1222_004072T0	Kleb_pneu_GCA_000818615.1_V1.annotation.cds_PatKP167_001374T0
Kleb_pneu_UCI190	ST-116	2	Kleb_pneu_GCA_900093295.1_V1_PatKP1099_003481T0	Kleb_pneu_GCA_900093295.1_V1.annotation.cds_PatKP1099_003487T0
Kleb_pneu_GCA_002202275.1	ST-1161	0
Kleb_pneu_GCA_900085875.1_V1	ST-1180	0
Kleb_pneu_BIDMC_22_V1	ST-1189	0
Kleb_pneu_GCA_900173825.1_V1	ST-1189	0
Kleb_pneu_GCA_900173835.1_V1	ST-1189	0
Kleb_pneu_GCA_900174205.1_V1	ST-1189	0
Kleb_pneu_GCA_900174295.1	ST-1189	0
Kleb_pneu_UCI_8_V1	ST-1198	0
Kleb_pneu_GCA_900173735.1_V1	ST-12	1	Kleb_pneu_GCA_002187055.1_PatKP2469_001747T0	Kleb_pneu_GCA_001441285.1_V1.annotation.cds_PatKP329_004905T0
Kleb_pneu_GCA_900174255.1_V1	ST-12	1	Kleb_pneu_GCA_002187055.1_PatKP2469_001747T0	Kleb_pneu_GCA_001441285.1_V1.annotation.cds_PatKP329_004905T0
Kleb_pneu_GCA_002187055.1	ST-12	1	Kleb_pneu_GCA_002187055.1_PatKP2469_001747T0	Kleb_pneu_GCA_002187055.1.annotation.cds_PatKP2469_000002T0
Kleb_pneu_GCA_002187065.1	ST-12	1	Kleb_pneu_GCA_002187055.1_PatKP2469_001747T0	Kleb_pneu_GCA_002187055.1.annotation.cds_PatKP2469_000002T0
Kleb_pneu_GCA_002187095.1	ST-12	1	Kleb_pneu_GCA_002187055.1_PatKP2469_001747T0	Kleb_pneu_GCA_002187055.1.annotation.cds_PatKP2469_000002T0
Kleb_pneu_GCA_002187135.1	ST-12	1	Kleb_pneu_GCA_002187055.1_PatKP2469_001747T0	Kleb_pneu_GCA_002187055.1.annotation.cds_PatKP2469_000002T0
Kleb_pneu_GCA_000820445.1_V1	ST-12	3	Kleb_pneu_GCA_002187055.1_PatKP2469_001747T0	Kleb_pneu_GCA_001441285.1_V1.annotation.cds_PatKP329_004905T0
Kleb_pneu_GCA_002258175.1	ST-1213	0
Kleb_pneu_subsp._pneumoniae_LZ_GCA_000263095.1_V1	ST-1222	0
Kleb_pneu_GCA_900085745.1_V1	ST-1236	0
Kleb_pneu_GCA_000822445.1_V1	ST-1243	0
Kleb_pneu_GCA_000822665.1_V1	ST-1243	0
Kleb_pneu_MGH150	ST-129	2	Kleb_pneu_GCA_900084735.1_V1_PatKP859_001299T0	Kleb_pneu_GCA_002271335.1.annotation.cds_PatKP1383_003990T0
Kleb_pneu_GCA_002187545.1	ST-13	2	Kleb_pneu_GCA_002187545.1_PatKP1745_004694T0	Kleb_pneu_GCA_002187545.1.annotation.cds_PatKP1745_004700T0
Kleb_pneu_GCA_900176905.1	ST-13	2	Kleb_pneu_GCA_002187545.1_PatKP1745_004694T0	Kleb_pneu_GCA_002187545.1.annotation.cds_PatKP1745_004700T0
Kleb_pneu_subsp._pneumoniae_GCA_900181205.1	ST-13	2	Kleb_pneu_GCA_002187545.1_PatKP1745_004694T0	Kleb_pneu_subsp._pneumoniae_GCA_900181205.1.annotation.cds_PatKP1448_004794T0
Kleb_pneu_subsp._pneumoniae_GCA_900181245.1	ST-13	2	Kleb_pneu_GCA_002187545.1_PatKP1745_004694T0	Kleb_pneu_subsp._pneumoniae_GCA_900181205.1.annotation.cds_PatKP1448_004794T0
Kleb_pneu_1162281_GCA_000219965.2_V1	ST-133	0
Kleb_pneu_BWH_28_V1	ST-133	0
Kleb_pneu_GCA_900086095.1_V1	ST-133	0
Kleb_pneu_GCA_900085215.1_V1	ST-134	2	Kleb_pneu_GCA_002180315.1_PatKP2272_001056T0	Kleb_pneu_JH1_GCA_000219945.2_V1.annotation.cds_PatKP5_003290T0
Kleb_pneu_JH1_GCA_000219945.2_V1	ST-134	2	Kleb_pneu_GCA_002180315.1_PatKP2272_001056T0	Kleb_pneu_JH1_GCA_000219945.2_V1.annotation.cds_PatKP5_003290T0
Kleb_pneu_MGH_17_V1	ST-134	2	Kleb_pneu_GCA_002180315.1_PatKP2272_001056T0	Kleb_pneu_JH1_GCA_000219945.2_V1.annotation.cds_PatKP5_003290T0
Kleb_pneu_subsp._pneumoniae_WGLW5_GCA_000300955.1_V1	ST-134	2	Kleb_pneu_GCA_002180315.1_PatKP2272_001056T0	Kleb_pneu_JH1_GCA_000219945.2_V1.annotation.cds_PatKP5_003290T0
Kleb_pneu_UCI_4_V1	ST-14	0
Kleb_pneu_GCA_001875535.1_V1	ST-14	1	Kleb_pneu_GCA_002180315.1_PatKP2272_001056T0	Kleb_pneu_GCA_001875535.1_V1.annotation.cds_PatKP595_005231T0
Kleb_pneu_GCA_001901585.1_V1	ST-14	1	Kleb_pneu_GCA_002180315.1_PatKP2272_001056T0	Kleb_pneu_GCA_002180315.1.annotation.cds_PatKP2272_001050T0
Kleb_pneu_subsp._pneumoniae_WGLW2_GCA_000300675.1_V1	ST-14	1	Kleb_pneu_GCA_002180315.1_PatKP2272_001056T0	Kleb_pneu_GCA_002180315.1.annotation.cds_PatKP2272_001050T0
Kleb_pneu_GCA_000689275.1_V1	ST-14	2	Kleb_pneu_GCA_002119955.1_PatKP1558_000414T0	Kleb_pneu_GCA_002180315.1.annotation.cds_PatKP2272_001050T0
Kleb_pneu_GCA_002102665.1	ST-14	2	Kleb_pneu_GCA_002119955.1_PatKP1558_000414T0	Kleb_pneu_GCA_002180315.1.annotation.cds_PatKP2272_001050T0
Kleb_pneu_GCA_002119955.1	ST-14	2	Kleb_pneu_GCA_002119955.1_PatKP1558_000414T0	Kleb_pneu_GCA_002180315.1.annotation.cds_PatKP2272_001050T0
Kleb_pneu_GCA_002271285.1	ST-14	2	Kleb_pneu_GCA_002119955.1_PatKP1558_000414T0	Kleb_pneu_GCA_002180315.1.annotation.cds_PatKP2272_001050T0
Kleb_pneu_GCA_001720805.1_V1	ST-14	2	Kleb_pneu_GCA_002180315.1_PatKP2272_001056T0	Kleb_pneu_GCA_001720805.1_V1.annotation.cds_PatKP564_000884T0
Kleb_pneu_GCA_001720875.1_V1	ST-14	2	Kleb_pneu_GCA_002180315.1_PatKP2272_001056T0	Kleb_pneu_GCA_001720805.1_V1.annotation.cds_PatKP564_000884T0
Kleb_pneu_BIDMC_11_V1	ST-14	2	Kleb_pneu_GCA_002180315.1_PatKP2272_001056T0	Kleb_pneu_GCA_002180315.1.annotation.cds_PatKP2272_001050T0
Kleb_pneu_GCA_001307175.1_V1	ST-14	2	Kleb_pneu_GCA_002180315.1_PatKP2272_001056T0	Kleb_pneu_GCA_002180315.1.annotation.cds_PatKP2272_001050T0
Kleb_pneu_GCA_001463165.1_V1	ST-14	2	Kleb_pneu_GCA_002180315.1_PatKP2272_001056T0	Kleb_pneu_GCA_002180315.1.annotation.cds_PatKP2272_001050T0
Kleb_pneu_GCA_001463475.1_V1	ST-14	2	Kleb_pneu_GCA_002180315.1_PatKP2272_001056T0	Kleb_pneu_GCA_002180315.1.annotation.cds_PatKP2272_001050T0
Kleb_pneu_GCA_001709275.1_V1	ST-14	2	Kleb_pneu_GCA_002180315.1_PatKP2272_001056T0	Kleb_pneu_GCA_002180315.1.annotation.cds_PatKP2272_001050T0
Kleb_pneu_GCA_001709295.1_V1	ST-14	2	Kleb_pneu_GCA_002180315.1_PatKP2272_001056T0	Kleb_pneu_GCA_002180315.1.annotation.cds_PatKP2272_001050T0
Kleb_pneu_GCA_001720705.1_V1	ST-14	2	Kleb_pneu_GCA_002180315.1_PatKP2272_001056T0	Kleb_pneu_GCA_002180315.1.annotation.cds_PatKP2272_001050T0
Kleb_pneu_GCA_001879425.1_V1	ST-14	2	Kleb_pneu_GCA_002180315.1_PatKP2272_001056T0	Kleb_pneu_GCA_002180315.1.annotation.cds_PatKP2272_001050T0
Kleb_pneu_GCA_001891185.1_V1	ST-14	2	Kleb_pneu_GCA_002180315.1_PatKP2272_001056T0	Kleb_pneu_GCA_002180315.1.annotation.cds_PatKP2272_001050T0
Kleb_pneu_GCA_002055855.1_V1	ST-14	2	Kleb_pneu_GCA_002180315.1_PatKP2272_001056T0	Kleb_pneu_GCA_002180315.1.annotation.cds_PatKP2272_001050T0
Kleb_pneu_GCA_002102655.1	ST-14	2	Kleb_pneu_GCA_002180315.1_PatKP2272_001056T0	Kleb_pneu_GCA_002180315.1.annotation.cds_PatKP2272_001050T0
Kleb_pneu_GCA_002156785.1	ST-14	2	Kleb_pneu_GCA_002180315.1_PatKP2272_001056T0	Kleb_pneu_GCA_002180315.1.annotation.cds_PatKP2272_001050T0
Kleb_pneu_GCA_002180315.1	ST-14	2	Kleb_pneu_GCA_002180315.1_PatKP2272_001056T0	Kleb_pneu_GCA_002180315.1.annotation.cds_PatKP2272_001050T0
Kleb_pneu_GCA_002510095.1	ST-14	2	Kleb_pneu_GCA_002180315.1_PatKP2272_001056T0	Kleb_pneu_GCA_002180315.1.annotation.cds_PatKP2272_001050T0
Kleb_pneu_GCA_900084665.1_V1	ST-14	2	Kleb_pneu_GCA_002180315.1_PatKP2272_001056T0	Kleb_pneu_GCA_002180315.1.annotation.cds_PatKP2272_001050T0
Kleb_pneu_GCA_900084705.1_V1	ST-14	2	Kleb_pneu_GCA_002180315.1_PatKP2272_001056T0	Kleb_pneu_GCA_002180315.1.annotation.cds_PatKP2272_001050T0
Kleb_pneu_GCA_900085945.1_V1	ST-14	2	Kleb_pneu_GCA_002180315.1_PatKP2272_001056T0	Kleb_pneu_GCA_002180315.1.annotation.cds_PatKP2272_001050T0
Kleb_pneu_JHCK1_GCA_000316265.2_V1	ST-14	2	Kleb_pneu_GCA_002180315.1_PatKP2272_001056T0	Kleb_pneu_GCA_002180315.1.annotation.cds_PatKP2272_001050T0
Kleb_pneu_MGH124_V1	ST-14	2	Kleb_pneu_GCA_002180315.1_PatKP2272_001056T0	Kleb_pneu_GCA_002180315.1.annotation.cds_PatKP2272_001050T0
Kleb_pneu_MGH157_V1	ST-14	2	Kleb_pneu_GCA_002180315.1_PatKP2272_001056T0	Kleb_pneu_GCA_002180315.1.annotation.cds_PatKP2272_001050T0
Kleb_pneu_subsp._pneumoniae_GCA_001316865.2_V1	ST-14	2	Kleb_pneu_GCA_002180315.1_PatKP2272_001056T0	Kleb_pneu_GCA_002180315.1.annotation.cds_PatKP2272_001050T0
Kleb_pneu_subsp._pneumoniae_GCA_001521895.1_V1	ST-14	2	Kleb_pneu_GCA_002180315.1_PatKP2272_001056T0	Kleb_pneu_GCA_002180315.1.annotation.cds_PatKP2272_001050T0
Kleb_pneu_subsp._pneumoniae_GCA_002239715.1	ST-14	2	Kleb_pneu_GCA_002180315.1_PatKP2272_001056T0	Kleb_pneu_GCA_002180315.1.annotation.cds_PatKP2272_001050T0
Kleb_pneu_subsp._pneumoniae_GCA_002246395.1	ST-14	2	Kleb_pneu_GCA_002180315.1_PatKP2272_001056T0	Kleb_pneu_GCA_002180315.1.annotation.cds_PatKP2272_001050T0
Kleb_pneu_subsp._pneumoniae_GCA_002246415.1	ST-14	2	Kleb_pneu_GCA_002180315.1_PatKP2272_001056T0	Kleb_pneu_GCA_002180315.1.annotation.cds_PatKP2272_001050T0
Kleb_pneu_subsp._pneumoniae_GCA_002246785.1	ST-14	2	Kleb_pneu_GCA_002180315.1_PatKP2272_001056T0	Kleb_pneu_GCA_002180315.1.annotation.cds_PatKP2272_001050T0
Kleb_pneu_subsp._pneumoniae_GCA_002246895.1	ST-14	2	Kleb_pneu_GCA_002180315.1_PatKP2272_001056T0	Kleb_pneu_GCA_002180315.1.annotation.cds_PatKP2272_001050T0
Kleb_pneu_subsp._pneumoniae_PittNDM01_GCA_000733255.1_V1	ST-14	2	Kleb_pneu_GCA_002180315.1_PatKP2272_001056T0	Kleb_pneu_GCA_002180315.1.annotation.cds_PatKP2272_001050T0
Kleb_pneu_GCA_002186595.1	ST-14	2	Kleb_pneu_GCA_002180315.1_PatKP2272_001056T0	Kleb_pneu_GCA_002186595.1.annotation.cds_PatKP1382_000691T0
Kleb_pneu_GCA_002187025.1	ST-14	2	Kleb_pneu_GCA_002180315.1_PatKP2272_001056T0	Kleb_pneu_GCA_002186595.1.annotation.cds_PatKP1382_000691T0
Kleb_pneu_GCA_900085325.1_V1	ST-14	2	Kleb_pneu_GCA_002180315.1_PatKP2272_001056T0	Kleb_pneu_GCA_900085325.1_V1.annotation.cds_PatKP916_004457T0
Kleb_pneu_GCA_900092675.1_V1	ST-14	2	Kleb_pneu_GCA_900092675.1_V1_PatKP1043_003954T0	Kleb_pneu_GCA_002180315.1.annotation.cds_PatKP2272_001050T0
Kleb_pneu_GCA_001483055.1_V1	ST-14	2	Kleb_pneu_subsp._pneumoniae_GCA_900180835.1_PatKP1697_001737T0	Kleb_pneu_subsp._pneumoniae_GCA_900180835.1.annotation.cds_PatKP1697_001743T0
Kleb_pneu_GCA_900085025.1_V1	ST-14	2	Kleb_pneu_subsp._pneumoniae_GCA_900180835.1_PatKP1697_001737T0	Kleb_pneu_subsp._pneumoniae_GCA_900180835.1.annotation.cds_PatKP1697_001743T0
Kleb_pneu_GCA_900086185.1_V1	ST-14	2	Kleb_pneu_subsp._pneumoniae_GCA_900180835.1_PatKP1697_001737T0	Kleb_pneu_subsp._pneumoniae_GCA_900180835.1.annotation.cds_PatKP1697_001743T0
Kleb_pneu_MGH_46_V1	ST-14	2	Kleb_pneu_subsp._pneumoniae_GCA_900180835.1_PatKP1697_001737T0	Kleb_pneu_subsp._pneumoniae_GCA_900180835.1.annotation.cds_PatKP1697_001743T0
Kleb_pneu_GCA_900205385.1	ST-14	3	Kleb_pneu_GCA_002180315.1_PatKP2272_001056T0	Kleb_pneu_GCA_002180315.1.annotation.cds_PatKP2272_001050T0
Kleb_pneu_GCA_000763925.1_V1	ST-147	1	Kleb_pneu_GCA_900084735.1_V1_PatKP859_001299T0	Kleb_pneu_GCA_000956385.1_V1.annotation.cds_PatKP252_003150T0
Kleb_pneu_GCA_000763935.1_V1	ST-147	1	Kleb_pneu_GCA_900084735.1_V1_PatKP859_001299T0	Kleb_pneu_GCA_000956385.1_V1.annotation.cds_PatKP252_003150T0
Kleb_pneu_GCA_000817855.1_V1	ST-147	1	Kleb_pneu_GCA_900084735.1_V1_PatKP859_001299T0	Kleb_pneu_GCA_000956385.1_V1.annotation.cds_PatKP252_003150T0
Kleb_pneu_GCA_000956385.1_V1	ST-147	1	Kleb_pneu_GCA_900084735.1_V1_PatKP859_001299T0	Kleb_pneu_GCA_000956385.1_V1.annotation.cds_PatKP252_003150T0
Kleb_pneu_GCA_000956395.1_V1	ST-147	1	Kleb_pneu_GCA_900084735.1_V1_PatKP859_001299T0	Kleb_pneu_GCA_000956385.1_V1.annotation.cds_PatKP252_003150T0
Kleb_pneu_GCA_000958945.1_V1	ST-147	1	Kleb_pneu_GCA_900084735.1_V1_PatKP859_001299T0	Kleb_pneu_GCA_000956385.1_V1.annotation.cds_PatKP252_003150T0
Kleb_pneu_GCA_000958955.1_V1	ST-147	1	Kleb_pneu_GCA_900084735.1_V1_PatKP859_001299T0	Kleb_pneu_GCA_000956385.1_V1.annotation.cds_PatKP252_003150T0
Kleb_pneu_GCA_000958965.1_V1	ST-147	1	Kleb_pneu_GCA_900084735.1_V1_PatKP859_001299T0	Kleb_pneu_GCA_000956385.1_V1.annotation.cds_PatKP252_003150T0
Kleb_pneu_GCA_000958975.1_V1	ST-147	1	Kleb_pneu_GCA_900084735.1_V1_PatKP859_001299T0	Kleb_pneu_GCA_000956385.1_V1.annotation.cds_PatKP252_003150T0
Kleb_pneu_GCA_001455995.1_V1	ST-147	1	Kleb_pneu_GCA_900084735.1_V1_PatKP859_001299T0	Kleb_pneu_GCA_000956385.1_V1.annotation.cds_PatKP252_003150T0
Kleb_pneu_GCA_001462825.1_V1	ST-147	1	Kleb_pneu_GCA_900084735.1_V1_PatKP859_001299T0	Kleb_pneu_GCA_000956385.1_V1.annotation.cds_PatKP252_003150T0
Kleb_pneu_GCA_001462845.1_V1	ST-147	1	Kleb_pneu_GCA_900084735.1_V1_PatKP859_001299T0	Kleb_pneu_GCA_000956385.1_V1.annotation.cds_PatKP252_003150T0
Kleb_pneu_GCA_001463085.1_V1	ST-147	1	Kleb_pneu_GCA_900084735.1_V1_PatKP859_001299T0	Kleb_pneu_GCA_000956385.1_V1.annotation.cds_PatKP252_003150T0
Kleb_pneu_GCA_001511015.1_V1	ST-147	1	Kleb_pneu_GCA_900084735.1_V1_PatKP859_001299T0	Kleb_pneu_GCA_000956385.1_V1.annotation.cds_PatKP252_003150T0
Kleb_pneu_GCA_001644765.1_V1	ST-147	1	Kleb_pneu_GCA_900084735.1_V1_PatKP859_001299T0	Kleb_pneu_GCA_000956385.1_V1.annotation.cds_PatKP252_003150T0
Kleb_pneu_GCA_001648215.1_V1	ST-147	1	Kleb_pneu_GCA_900084735.1_V1_PatKP859_001299T0	Kleb_pneu_GCA_000956385.1_V1.annotation.cds_PatKP252_003150T0
Kleb_pneu_GCA_001701425.1_V1	ST-147	1	Kleb_pneu_GCA_900084735.1_V1_PatKP859_001299T0	Kleb_pneu_GCA_000956385.1_V1.annotation.cds_PatKP252_003150T0
Kleb_pneu_GCA_001855315.1_V1	ST-147	1	Kleb_pneu_GCA_900084735.1_V1_PatKP859_001299T0	Kleb_pneu_GCA_000956385.1_V1.annotation.cds_PatKP252_003150T0
Kleb_pneu_GCA_001875105.1_V1	ST-147	1	Kleb_pneu_GCA_900084735.1_V1_PatKP859_001299T0	Kleb_pneu_GCA_000956385.1_V1.annotation.cds_PatKP252_003150T0
Kleb_pneu_GCA_001885255.2_V1	ST-147	1	Kleb_pneu_GCA_900084735.1_V1_PatKP859_001299T0	Kleb_pneu_GCA_000956385.1_V1.annotation.cds_PatKP252_003150T0
Kleb_pneu_GCA_001903685.1_V1	ST-147	1	Kleb_pneu_GCA_900084735.1_V1_PatKP859_001299T0	Kleb_pneu_GCA_000956385.1_V1.annotation.cds_PatKP252_003150T0
Kleb_pneu_GCA_001904245.1_V1	ST-147	1	Kleb_pneu_GCA_900084735.1_V1_PatKP859_001299T0	Kleb_pneu_GCA_000956385.1_V1.annotation.cds_PatKP252_003150T0
Kleb_pneu_GCA_001908595.1_V1	ST-147	1	Kleb_pneu_GCA_900084735.1_V1_PatKP859_001299T0	Kleb_pneu_GCA_000956385.1_V1.annotation.cds_PatKP252_003150T0
Kleb_pneu_GCA_001908625.1_V1	ST-147	1	Kleb_pneu_GCA_900084735.1_V1_PatKP859_001299T0	Kleb_pneu_GCA_000956385.1_V1.annotation.cds_PatKP252_003150T0
Kleb_pneu_GCA_001908655.1_V1	ST-147	1	Kleb_pneu_GCA_900084735.1_V1_PatKP859_001299T0	Kleb_pneu_GCA_000956385.1_V1.annotation.cds_PatKP252_003150T0
Kleb_pneu_GCA_001908675.1_V1	ST-147	1	Kleb_pneu_GCA_900084735.1_V1_PatKP859_001299T0	Kleb_pneu_GCA_000956385.1_V1.annotation.cds_PatKP252_003150T0
Kleb_pneu_GCA_001908695.1_V1	ST-147	1	Kleb_pneu_GCA_900084735.1_V1_PatKP859_001299T0	Kleb_pneu_GCA_000956385.1_V1.annotation.cds_PatKP252_003150T0
Kleb_pneu_GCA_001908875.1_V1	ST-147	1	Kleb_pneu_GCA_900084735.1_V1_PatKP859_001299T0	Kleb_pneu_GCA_000956385.1_V1.annotation.cds_PatKP252_003150T0
Kleb_pneu_GCA_001956965.1_V1	ST-147	1	Kleb_pneu_GCA_900084735.1_V1_PatKP859_001299T0	Kleb_pneu_GCA_000956385.1_V1.annotation.cds_PatKP252_003150T0
Kleb_pneu_GCA_002108275.1	ST-147	1	Kleb_pneu_GCA_900084735.1_V1_PatKP859_001299T0	Kleb_pneu_GCA_000956385.1_V1.annotation.cds_PatKP252_003150T0
Kleb_pneu_GCA_002187575.1	ST-147	1	Kleb_pneu_GCA_900084735.1_V1_PatKP859_001299T0	Kleb_pneu_GCA_000956385.1_V1.annotation.cds_PatKP252_003150T0
Kleb_pneu_GCA_002188145.1	ST-147	1	Kleb_pneu_GCA_900084735.1_V1_PatKP859_001299T0	Kleb_pneu_GCA_000956385.1_V1.annotation.cds_PatKP252_003150T0
Kleb_pneu_GCA_002188245.1	ST-147	1	Kleb_pneu_GCA_900084735.1_V1_PatKP859_001299T0	Kleb_pneu_GCA_000956385.1_V1.annotation.cds_PatKP252_003150T0
Kleb_pneu_GCA_002192375.1	ST-147	1	Kleb_pneu_GCA_900084735.1_V1_PatKP859_001299T0	Kleb_pneu_GCA_000956385.1_V1.annotation.cds_PatKP252_003150T0
Kleb_pneu_GCA_002202215.1	ST-147	1	Kleb_pneu_GCA_900084735.1_V1_PatKP859_001299T0	Kleb_pneu_GCA_000956385.1_V1.annotation.cds_PatKP252_003150T0
Kleb_pneu_GCA_002202235.1	ST-147	1	Kleb_pneu_GCA_900084735.1_V1_PatKP859_001299T0	Kleb_pneu_GCA_000956385.1_V1.annotation.cds_PatKP252_003150T0
Kleb_pneu_GCA_002258105.1	ST-147	1	Kleb_pneu_GCA_900084735.1_V1_PatKP859_001299T0	Kleb_pneu_GCA_000956385.1_V1.annotation.cds_PatKP252_003150T0
Kleb_pneu_GCA_002263345.1	ST-147	1	Kleb_pneu_GCA_900084735.1_V1_PatKP859_001299T0	Kleb_pneu_GCA_000956385.1_V1.annotation.cds_PatKP252_003150T0
Kleb_pneu_GCA_002263375.1	ST-147	1	Kleb_pneu_GCA_900084735.1_V1_PatKP859_001299T0	Kleb_pneu_GCA_000956385.1_V1.annotation.cds_PatKP252_003150T0
Kleb_pneu_GCA_002591075.1	ST-147	1	Kleb_pneu_GCA_900084735.1_V1_PatKP859_001299T0	Kleb_pneu_GCA_000956385.1_V1.annotation.cds_PatKP252_003150T0
Kleb_pneu_GCA_002636375.1	ST-147	1	Kleb_pneu_GCA_900084735.1_V1_PatKP859_001299T0	Kleb_pneu_GCA_000956385.1_V1.annotation.cds_PatKP252_003150T0
Kleb_pneu_GCA_900084235.1_V1	ST-147	1	Kleb_pneu_GCA_900084735.1_V1_PatKP859_001299T0	Kleb_pneu_GCA_000956385.1_V1.annotation.cds_PatKP252_003150T0
Kleb_pneu_GCA_900084905.1_V1	ST-147	1	Kleb_pneu_GCA_900084735.1_V1_PatKP859_001299T0	Kleb_pneu_GCA_000956385.1_V1.annotation.cds_PatKP252_003150T0
Kleb_pneu_GCA_900085095.1_V1	ST-147	1	Kleb_pneu_GCA_900084735.1_V1_PatKP859_001299T0	Kleb_pneu_GCA_000956385.1_V1.annotation.cds_PatKP252_003150T0
Kleb_pneu_GCA_900085105.1_V1	ST-147	1	Kleb_pneu_GCA_900084735.1_V1_PatKP859_001299T0	Kleb_pneu_GCA_000956385.1_V1.annotation.cds_PatKP252_003150T0
Kleb_pneu_GCA_900085115.1_V1	ST-147	1	Kleb_pneu_GCA_900084735.1_V1_PatKP859_001299T0	Kleb_pneu_GCA_000956385.1_V1.annotation.cds_PatKP252_003150T0
Kleb_pneu_GCA_900085145.1_V1	ST-147	1	Kleb_pneu_GCA_900084735.1_V1_PatKP859_001299T0	Kleb_pneu_GCA_000956385.1_V1.annotation.cds_PatKP252_003150T0
Kleb_pneu_GCA_900085785.1_V1	ST-147	1	Kleb_pneu_GCA_900084735.1_V1_PatKP859_001299T0	Kleb_pneu_GCA_000956385.1_V1.annotation.cds_PatKP252_003150T0
Kleb_pneu_GCA_900086065.1_V1	ST-147	1	Kleb_pneu_GCA_900084735.1_V1_PatKP859_001299T0	Kleb_pneu_GCA_000956385.1_V1.annotation.cds_PatKP252_003150T0
Kleb_pneu_GCA_900086085.1_V1	ST-147	1	Kleb_pneu_GCA_900084735.1_V1_PatKP859_001299T0	Kleb_pneu_GCA_000956385.1_V1.annotation.cds_PatKP252_003150T0
Kleb_pneu_GCA_900086155.1_V1	ST-147	1	Kleb_pneu_GCA_900084735.1_V1_PatKP859_001299T0	Kleb_pneu_GCA_000956385.1_V1.annotation.cds_PatKP252_003150T0
Kleb_pneu_GCA_900086215.1_V1	ST-147	1	Kleb_pneu_GCA_900084735.1_V1_PatKP859_001299T0	Kleb_pneu_GCA_000956385.1_V1.annotation.cds_PatKP252_003150T0
Kleb_pneu_GCA_900086515.1_V1	ST-147	1	Kleb_pneu_GCA_900084735.1_V1_PatKP859_001299T0	Kleb_pneu_GCA_000956385.1_V1.annotation.cds_PatKP252_003150T0
Kleb_pneu_subsp._pneumoniae_GCA_001746535.1_V1	ST-147	1	Kleb_pneu_GCA_900084735.1_V1_PatKP859_001299T0	Kleb_pneu_GCA_000956385.1_V1.annotation.cds_PatKP252_003150T0
Kleb_pneu_subsp._pneumoniae_GCA_002087215.1_V1	ST-147	1	Kleb_pneu_GCA_900084735.1_V1_PatKP859_001299T0	Kleb_pneu_GCA_000956385.1_V1.annotation.cds_PatKP252_003150T0
Kleb_pneu_subsp._pneumoniae_GCA_002248485.1	ST-147	1	Kleb_pneu_GCA_900084735.1_V1_PatKP859_001299T0	Kleb_pneu_GCA_000956385.1_V1.annotation.cds_PatKP252_003150T0
Kleb_pneu_subsp._pneumoniae_GCA_002249195.1	ST-147	1	Kleb_pneu_GCA_900084735.1_V1_PatKP859_001299T0	Kleb_pneu_GCA_000956385.1_V1.annotation.cds_PatKP252_003150T0
Kleb_pneu_UCICRE-126	ST-147	1	Kleb_pneu_GCA_900084735.1_V1_PatKP859_001299T0	Kleb_pneu_GCA_000956385.1_V1.annotation.cds_PatKP252_003150T0
Kleb_pneu_GCA_002189175.1	ST-147	2	Kleb_pneu_GCA_002189175.1_PatKP2053_002113T0	Kleb_pneu_GCA_000956385.1_V1.annotation.cds_PatKP252_003150T0
Kleb_pneu_GCA_000822185.1_V1	ST-147	2	Kleb_pneu_GCA_900084735.1_V1_PatKP859_001299T0	Kleb_pneu_GCA_000956385.1_V1.annotation.cds_PatKP252_003150T0
Kleb_pneu_GCA_002406915.1	ST-147	2	Kleb_pneu_GCA_900084735.1_V1_PatKP859_001299T0	Kleb_pneu_GCA_000956385.1_V1.annotation.cds_PatKP252_003150T0
Kleb_pneu_MGH93_V1	ST-147	2	Kleb_pneu_GCA_900084735.1_V1_PatKP859_001299T0	Kleb_pneu_GCA_000956385.1_V1.annotation.cds_PatKP252_003150T0
Kleb_pneu_MGH_63_V1	ST-15	0	Kleb_pneu_subsp._pneumoniae_GCA_900180835.1_PatKP1697_001737T0	Kleb_pneu_subsp._pneumoniae_GCA_900180835.1.annotation.cds_PatKP1697_001743T0
Kleb_pneu_GCA_001653695.1_V1	ST-15	1
Kleb_pneu_GCA_002187335.1	ST-15	1	Kleb_pneu_subsp._pneumoniae_GCA_900180835.1_PatKP1697_001737T0	Kleb_pneu_GCA_002187335.1.annotation.cds_PatKP1486_004733T0
Kleb_pneu_GCA_002417545.1	ST-15	1	Kleb_pneu_subsp._pneumoniae_GCA_900180835.1_PatKP1697_001737T0	Kleb_pneu_subsp._pneumoniae_GCA_900180835.1.annotation.cds_PatKP1697_001743T0
Kleb_pneu_GCA_000821625.1_V1	ST-15	2	Kleb_pneu_subsp._pneumoniae_GCA_900180835.1_PatKP1697_001737T0	Kleb_pneu_GCA_002186695.1.annotation.cds_PatKP2380_004496T0
Kleb_pneu_GCA_000823105.1_V1	ST-15	2	Kleb_pneu_subsp._pneumoniae_GCA_900180835.1_PatKP1697_001737T0	Kleb_pneu_GCA_002186695.1.annotation.cds_PatKP2380_004496T0
Kleb_pneu_GCA_001597015.1_V1	ST-15	2	Kleb_pneu_subsp._pneumoniae_GCA_900180835.1_PatKP1697_001737T0	Kleb_pneu_GCA_002186695.1.annotation.cds_PatKP2380_004496T0
Kleb_pneu_GCA_001950675.1_V1	ST-15	2	Kleb_pneu_subsp._pneumoniae_GCA_900180835.1_PatKP1697_001737T0	Kleb_pneu_GCA_002186695.1.annotation.cds_PatKP2380_004496T0
Kleb_pneu_GCA_002150645.1	ST-15	2	Kleb_pneu_subsp._pneumoniae_GCA_900180835.1_PatKP1697_001737T0	Kleb_pneu_GCA_002186695.1.annotation.cds_PatKP2380_004496T0
Kleb_pneu_GCA_002186695.1	ST-15	2	Kleb_pneu_subsp._pneumoniae_GCA_900180835.1_PatKP1697_001737T0	Kleb_pneu_GCA_002186695.1.annotation.cds_PatKP2380_004496T0
Kleb_pneu_GCA_002189185.1	ST-15	2	Kleb_pneu_subsp._pneumoniae_GCA_900180835.1_PatKP1697_001737T0	Kleb_pneu_GCA_002186695.1.annotation.cds_PatKP2380_004496T0
Kleb_pneu_GCA_002189345.1	ST-15	2	Kleb_pneu_subsp._pneumoniae_GCA_900180835.1_PatKP1697_001737T0	Kleb_pneu_GCA_002186695.1.annotation.cds_PatKP2380_004496T0
Kleb_pneu_GCA_002417375.1	ST-15	2	Kleb_pneu_subsp._pneumoniae_GCA_900180835.1_PatKP1697_001737T0	Kleb_pneu_GCA_002186695.1.annotation.cds_PatKP2380_004496T0
Kleb_pneu_GCA_002417435.1	ST-15	2	Kleb_pneu_subsp._pneumoniae_GCA_900180835.1_PatKP1697_001737T0	Kleb_pneu_GCA_002186695.1.annotation.cds_PatKP2380_004496T0
Kleb_pneu_GCA_900084415.1_V1	ST-15	2	Kleb_pneu_subsp._pneumoniae_GCA_900180835.1_PatKP1697_001737T0	Kleb_pneu_GCA_002186695.1.annotation.cds_PatKP2380_004496T0
Kleb_pneu_GCA_900084465.1_V1	ST-15	2	Kleb_pneu_subsp._pneumoniae_GCA_900180835.1_PatKP1697_001737T0	Kleb_pneu_GCA_002186695.1.annotation.cds_PatKP2380_004496T0
Kleb_pneu_GCA_900085375.1_V1	ST-15	2	Kleb_pneu_subsp._pneumoniae_GCA_900180835.1_PatKP1697_001737T0	Kleb_pneu_GCA_002186695.1.annotation.cds_PatKP2380_004496T0
Kleb_pneu_GCA_900085885.1_V1	ST-15	2	Kleb_pneu_subsp._pneumoniae_GCA_900180835.1_PatKP1697_001737T0	Kleb_pneu_GCA_002186695.1.annotation.cds_PatKP2380_004496T0
Kleb_pneu_GCA_900086195.1_V1	ST-15	2	Kleb_pneu_subsp._pneumoniae_GCA_900180835.1_PatKP1697_001737T0	Kleb_pneu_GCA_002186695.1.annotation.cds_PatKP2380_004496T0
Kleb_pneu_UCI149	ST-15	2	Kleb_pneu_subsp._pneumoniae_GCA_900180835.1_PatKP1697_001737T0	Kleb_pneu_GCA_002186695.1.annotation.cds_PatKP2380_004496T0
Kleb_pneu_303K_GCA_000474635.1_V1	ST-15	2	Kleb_pneu_subsp._pneumoniae_GCA_900180835.1_PatKP1697_001737T0	Kleb_pneu_subsp._pneumoniae_GCA_900180835.1.annotation.cds_PatKP1697_001743T0
Kleb_pneu_BIDMC_33B_V1	ST-15	2	Kleb_pneu_subsp._pneumoniae_GCA_900180835.1_PatKP1697_001737T0	Kleb_pneu_subsp._pneumoniae_GCA_900180835.1.annotation.cds_PatKP1697_001743T0
Kleb_pneu_BIDMC123	ST-15	2	Kleb_pneu_subsp._pneumoniae_GCA_900180835.1_PatKP1697_001737T0	Kleb_pneu_subsp._pneumoniae_GCA_900180835.1.annotation.cds_PatKP1697_001743T0
Kleb_pneu_BIDMC124	ST-15	2	Kleb_pneu_subsp._pneumoniae_GCA_900180835.1_PatKP1697_001737T0	Kleb_pneu_subsp._pneumoniae_GCA_900180835.1.annotation.cds_PatKP1697_001743T0
Kleb_pneu_GCA_000764615.1_V1	ST-15	2	Kleb_pneu_subsp._pneumoniae_GCA_900180835.1_PatKP1697_001737T0	Kleb_pneu_subsp._pneumoniae_GCA_900180835.1.annotation.cds_PatKP1697_001743T0
Kleb_pneu_GCA_000943095.1_V1	ST-15	2	Kleb_pneu_subsp._pneumoniae_GCA_900180835.1_PatKP1697_001737T0	Kleb_pneu_subsp._pneumoniae_GCA_900180835.1.annotation.cds_PatKP1697_001743T0
Kleb_pneu_GCA_001596905.1_V1	ST-15	2	Kleb_pneu_subsp._pneumoniae_GCA_900180835.1_PatKP1697_001737T0	Kleb_pneu_subsp._pneumoniae_GCA_900180835.1.annotation.cds_PatKP1697_001743T0
Kleb_pneu_GCA_001596915.1_V1	ST-15	2	Kleb_pneu_subsp._pneumoniae_GCA_900180835.1_PatKP1697_001737T0	Kleb_pneu_subsp._pneumoniae_GCA_900180835.1.annotation.cds_PatKP1697_001743T0
Kleb_pneu_GCA_001596925.1_V1	ST-15	2	Kleb_pneu_subsp._pneumoniae_GCA_900180835.1_PatKP1697_001737T0	Kleb_pneu_subsp._pneumoniae_GCA_900180835.1.annotation.cds_PatKP1697_001743T0
Kleb_pneu_GCA_001596935.1_V1	ST-15	2	Kleb_pneu_subsp._pneumoniae_GCA_900180835.1_PatKP1697_001737T0	Kleb_pneu_subsp._pneumoniae_GCA_900180835.1.annotation.cds_PatKP1697_001743T0
Kleb_pneu_GCA_001596985.1_V1	ST-15	2	Kleb_pneu_subsp._pneumoniae_GCA_900180835.1_PatKP1697_001737T0	Kleb_pneu_subsp._pneumoniae_GCA_900180835.1.annotation.cds_PatKP1697_001743T0
Kleb_pneu_GCA_001596995.1_V1	ST-15	2	Kleb_pneu_subsp._pneumoniae_GCA_900180835.1_PatKP1697_001737T0	Kleb_pneu_subsp._pneumoniae_GCA_900180835.1.annotation.cds_PatKP1697_001743T0
Kleb_pneu_GCA_001597095.1_V1	ST-15	2	Kleb_pneu_subsp._pneumoniae_GCA_900180835.1_PatKP1697_001737T0	Kleb_pneu_subsp._pneumoniae_GCA_900180835.1.annotation.cds_PatKP1697_001743T0
Kleb_pneu_GCA_001597115.1_V1	ST-15	2	Kleb_pneu_subsp._pneumoniae_GCA_900180835.1_PatKP1697_001737T0	Kleb_pneu_subsp._pneumoniae_GCA_900180835.1.annotation.cds_PatKP1697_001743T0
Kleb_pneu_GCA_001597145.1_V1	ST-15	2	Kleb_pneu_subsp._pneumoniae_GCA_900180835.1_PatKP1697_001737T0	Kleb_pneu_subsp._pneumoniae_GCA_900180835.1.annotation.cds_PatKP1697_001743T0
Kleb_pneu_GCA_001597165.1_V1	ST-15	2	Kleb_pneu_subsp._pneumoniae_GCA_900180835.1_PatKP1697_001737T0	Kleb_pneu_subsp._pneumoniae_GCA_900180835.1.annotation.cds_PatKP1697_001743T0
Kleb_pneu_GCA_001597175.1_V1	ST-15	2	Kleb_pneu_subsp._pneumoniae_GCA_900180835.1_PatKP1697_001737T0	Kleb_pneu_subsp._pneumoniae_GCA_900180835.1.annotation.cds_PatKP1697_001743T0
Kleb_pneu_GCA_001597195.1_V1	ST-15	2	Kleb_pneu_subsp._pneumoniae_GCA_900180835.1_PatKP1697_001737T0	Kleb_pneu_subsp._pneumoniae_GCA_900180835.1.annotation.cds_PatKP1697_001743T0
Kleb_pneu_GCA_001597225.1_V1	ST-15	2	Kleb_pneu_subsp._pneumoniae_GCA_900180835.1_PatKP1697_001737T0	Kleb_pneu_subsp._pneumoniae_GCA_900180835.1.annotation.cds_PatKP1697_001743T0
Kleb_pneu_GCA_001663195.1_V1	ST-15	2	Kleb_pneu_subsp._pneumoniae_GCA_900180835.1_PatKP1697_001737T0	Kleb_pneu_subsp._pneumoniae_GCA_900180835.1.annotation.cds_PatKP1697_001743T0
Kleb_pneu_GCA_001750805.1_V1	ST-15	2	Kleb_pneu_subsp._pneumoniae_GCA_900180835.1_PatKP1697_001737T0	Kleb_pneu_subsp._pneumoniae_GCA_900180835.1.annotation.cds_PatKP1697_001743T0
Kleb_pneu_GCA_001902395.1_V1	ST-15	2	Kleb_pneu_subsp._pneumoniae_GCA_900180835.1_PatKP1697_001737T0	Kleb_pneu_subsp._pneumoniae_GCA_900180835.1.annotation.cds_PatKP1697_001743T0
Kleb_pneu_GCA_002102635.1	ST-15	2	Kleb_pneu_subsp._pneumoniae_GCA_900180835.1_PatKP1697_001737T0	Kleb_pneu_subsp._pneumoniae_GCA_900180835.1.annotation.cds_PatKP1697_001743T0
Kleb_pneu_GCA_002188135.1	ST-15	2	Kleb_pneu_subsp._pneumoniae_GCA_900180835.1_PatKP1697_001737T0	Kleb_pneu_subsp._pneumoniae_GCA_900180835.1.annotation.cds_PatKP1697_001743T0
Kleb_pneu_GCA_002189165.1	ST-15	2	Kleb_pneu_subsp._pneumoniae_GCA_900180835.1_PatKP1697_001737T0	Kleb_pneu_subsp._pneumoniae_GCA_900180835.1.annotation.cds_PatKP1697_001743T0
Kleb_pneu_GCA_002205015.1	ST-15	2	Kleb_pneu_subsp._pneumoniae_GCA_900180835.1_PatKP1697_001737T0	Kleb_pneu_subsp._pneumoniae_GCA_900180835.1.annotation.cds_PatKP1697_001743T0
Kleb_pneu_GCA_002209405.1	ST-15	2	Kleb_pneu_subsp._pneumoniae_GCA_900180835.1_PatKP1697_001737T0	Kleb_pneu_subsp._pneumoniae_GCA_900180835.1.annotation.cds_PatKP1697_001743T0
Kleb_pneu_GCA_002211905.1	ST-15	2	Kleb_pneu_subsp._pneumoniae_GCA_900180835.1_PatKP1697_001737T0	Kleb_pneu_subsp._pneumoniae_GCA_900180835.1.annotation.cds_PatKP1697_001743T0
Kleb_pneu_GCA_002252415.1	ST-15	2	Kleb_pneu_subsp._pneumoniae_GCA_900180835.1_PatKP1697_001737T0	Kleb_pneu_subsp._pneumoniae_GCA_900180835.1.annotation.cds_PatKP1697_001743T0
Kleb_pneu_GCA_002257855.1	ST-15	2	Kleb_pneu_subsp._pneumoniae_GCA_900180835.1_PatKP1697_001737T0	Kleb_pneu_subsp._pneumoniae_GCA_900180835.1.annotation.cds_PatKP1697_001743T0
Kleb_pneu_GCA_002262785.1	ST-15	2	Kleb_pneu_subsp._pneumoniae_GCA_900180835.1_PatKP1697_001737T0	Kleb_pneu_subsp._pneumoniae_GCA_900180835.1.annotation.cds_PatKP1697_001743T0
Kleb_pneu_GCA_002264165.1	ST-15	2	Kleb_pneu_subsp._pneumoniae_GCA_900180835.1_PatKP1697_001737T0	Kleb_pneu_subsp._pneumoniae_GCA_900180835.1.annotation.cds_PatKP1697_001743T0
Kleb_pneu_GCA_002264425.1	ST-15	2	Kleb_pneu_subsp._pneumoniae_GCA_900180835.1_PatKP1697_001737T0	Kleb_pneu_subsp._pneumoniae_GCA_900180835.1.annotation.cds_PatKP1697_001743T0
Kleb_pneu_GCA_002416705.1	ST-15	2	Kleb_pneu_subsp._pneumoniae_GCA_900180835.1_PatKP1697_001737T0	Kleb_pneu_subsp._pneumoniae_GCA_900180835.1.annotation.cds_PatKP1697_001743T0
Kleb_pneu_GCA_900084065.1_V1	ST-15	2	Kleb_pneu_subsp._pneumoniae_GCA_900180835.1_PatKP1697_001737T0	Kleb_pneu_subsp._pneumoniae_GCA_900180835.1.annotation.cds_PatKP1697_001743T0
Kleb_pneu_GCA_900084075.1_V1	ST-15	2	Kleb_pneu_subsp._pneumoniae_GCA_900180835.1_PatKP1697_001737T0	Kleb_pneu_subsp._pneumoniae_GCA_900180835.1.annotation.cds_PatKP1697_001743T0
Kleb_pneu_GCA_900084095.1_V1	ST-15	2	Kleb_pneu_subsp._pneumoniae_GCA_900180835.1_PatKP1697_001737T0	Kleb_pneu_subsp._pneumoniae_GCA_900180835.1.annotation.cds_PatKP1697_001743T0
Kleb_pneu_GCA_900084165.1_V1	ST-15	2	Kleb_pneu_subsp._pneumoniae_GCA_900180835.1_PatKP1697_001737T0	Kleb_pneu_subsp._pneumoniae_GCA_900180835.1.annotation.cds_PatKP1697_001743T0
Kleb_pneu_GCA_900084445.1_V1	ST-15	2	Kleb_pneu_subsp._pneumoniae_GCA_900180835.1_PatKP1697_001737T0	Kleb_pneu_subsp._pneumoniae_GCA_900180835.1.annotation.cds_PatKP1697_001743T0
Kleb_pneu_GCA_900084505.1_V1	ST-15	2	Kleb_pneu_subsp._pneumoniae_GCA_900180835.1_PatKP1697_001737T0	Kleb_pneu_subsp._pneumoniae_GCA_900180835.1.annotation.cds_PatKP1697_001743T0
Kleb_pneu_GCA_900084515.1_V1	ST-15	2	Kleb_pneu_subsp._pneumoniae_GCA_900180835.1_PatKP1697_001737T0	Kleb_pneu_subsp._pneumoniae_GCA_900180835.1.annotation.cds_PatKP1697_001743T0
Kleb_pneu_GCA_900084615.1_V1	ST-15	2	Kleb_pneu_subsp._pneumoniae_GCA_900180835.1_PatKP1697_001737T0	Kleb_pneu_subsp._pneumoniae_GCA_900180835.1.annotation.cds_PatKP1697_001743T0
Kleb_pneu_GCA_900085195.1_V1	ST-15	2	Kleb_pneu_subsp._pneumoniae_GCA_900180835.1_PatKP1697_001737T0	Kleb_pneu_subsp._pneumoniae_GCA_900180835.1.annotation.cds_PatKP1697_001743T0
Kleb_pneu_GCA_900085555.1_V1	ST-15	2	Kleb_pneu_subsp._pneumoniae_GCA_900180835.1_PatKP1697_001737T0	Kleb_pneu_subsp._pneumoniae_GCA_900180835.1.annotation.cds_PatKP1697_001743T0
Kleb_pneu_GCA_900085695.1_V1	ST-15	2	Kleb_pneu_subsp._pneumoniae_GCA_900180835.1_PatKP1697_001737T0	Kleb_pneu_subsp._pneumoniae_GCA_900180835.1.annotation.cds_PatKP1697_001743T0
Kleb_pneu_GCA_900085995.1_V1	ST-15	2	Kleb_pneu_subsp._pneumoniae_GCA_900180835.1_PatKP1697_001737T0	Kleb_pneu_subsp._pneumoniae_GCA_900180835.1.annotation.cds_PatKP1697_001743T0
Kleb_pneu_GCA_900086025.1_V1	ST-15	2	Kleb_pneu_subsp._pneumoniae_GCA_900180835.1_PatKP1697_001737T0	Kleb_pneu_subsp._pneumoniae_GCA_900180835.1.annotation.cds_PatKP1697_001743T0
Kleb_pneu_GCA_900086225.1_V1	ST-15	2	Kleb_pneu_subsp._pneumoniae_GCA_900180835.1_PatKP1697_001737T0	Kleb_pneu_subsp._pneumoniae_GCA_900180835.1.annotation.cds_PatKP1697_001743T0
Kleb_pneu_GCA_900086235.1_V1	ST-15	2	Kleb_pneu_subsp._pneumoniae_GCA_900180835.1_PatKP1697_001737T0	Kleb_pneu_subsp._pneumoniae_GCA_900180835.1.annotation.cds_PatKP1697_001743T0
Kleb_pneu_GCA_900086295.1_V1	ST-15	2	Kleb_pneu_subsp._pneumoniae_GCA_900180835.1_PatKP1697_001737T0	Kleb_pneu_subsp._pneumoniae_GCA_900180835.1.annotation.cds_PatKP1697_001743T0
Kleb_pneu_GCA_900086395.1_V1	ST-15	2	Kleb_pneu_subsp._pneumoniae_GCA_900180835.1_PatKP1697_001737T0	Kleb_pneu_subsp._pneumoniae_GCA_900180835.1.annotation.cds_PatKP1697_001743T0
Kleb_pneu_GCA_900086475.1_V1	ST-15	2	Kleb_pneu_subsp._pneumoniae_GCA_900180835.1_PatKP1697_001737T0	Kleb_pneu_subsp._pneumoniae_GCA_900180835.1.annotation.cds_PatKP1697_001743T0
Kleb_pneu_GCA_900086485.1_V1	ST-15	2	Kleb_pneu_subsp._pneumoniae_GCA_900180835.1_PatKP1697_001737T0	Kleb_pneu_subsp._pneumoniae_GCA_900180835.1.annotation.cds_PatKP1697_001743T0
Kleb_pneu_GCA_900092985.1_V1	ST-15	2	Kleb_pneu_subsp._pneumoniae_GCA_900180835.1_PatKP1697_001737T0	Kleb_pneu_subsp._pneumoniae_GCA_900180835.1.annotation.cds_PatKP1697_001743T0
Kleb_pneu_GCA_900093275.1_V1	ST-15	2	Kleb_pneu_subsp._pneumoniae_GCA_900180835.1_PatKP1697_001737T0	Kleb_pneu_subsp._pneumoniae_GCA_900180835.1.annotation.cds_PatKP1697_001743T0
Kleb_pneu_MGH_65_V1	ST-15	2	Kleb_pneu_subsp._pneumoniae_GCA_900180835.1_PatKP1697_001737T0	Kleb_pneu_subsp._pneumoniae_GCA_900180835.1.annotation.cds_PatKP1697_001743T0
Kleb_pneu_MGH_75_V1	ST-15	2	Kleb_pneu_subsp._pneumoniae_GCA_900180835.1_PatKP1697_001737T0	Kleb_pneu_subsp._pneumoniae_GCA_900180835.1.annotation.cds_PatKP1697_001743T0
Kleb_pneu_MGH101_V1	ST-15	2	Kleb_pneu_subsp._pneumoniae_GCA_900180835.1_PatKP1697_001737T0	Kleb_pneu_subsp._pneumoniae_GCA_900180835.1.annotation.cds_PatKP1697_001743T0
Kleb_pneu_MGH115_V1	ST-15	2	Kleb_pneu_subsp._pneumoniae_GCA_900180835.1_PatKP1697_001737T0	Kleb_pneu_subsp._pneumoniae_GCA_900180835.1.annotation.cds_PatKP1697_001743T0
Kleb_pneu_MGH117_V1	ST-15	2	Kleb_pneu_subsp._pneumoniae_GCA_900180835.1_PatKP1697_001737T0	Kleb_pneu_subsp._pneumoniae_GCA_900180835.1.annotation.cds_PatKP1697_001743T0
Kleb_pneu_MGH155_V1	ST-15	2	Kleb_pneu_subsp._pneumoniae_GCA_900180835.1_PatKP1697_001737T0	Kleb_pneu_subsp._pneumoniae_GCA_900180835.1.annotation.cds_PatKP1697_001743T0
Kleb_pneu_MGH171_V1	ST-15	2	Kleb_pneu_subsp._pneumoniae_GCA_900180835.1_PatKP1697_001737T0	Kleb_pneu_subsp._pneumoniae_GCA_900180835.1.annotation.cds_PatKP1697_001743T0
Kleb_pneu_MGH191	ST-15	2	Kleb_pneu_subsp._pneumoniae_GCA_900180835.1_PatKP1697_001737T0	Kleb_pneu_subsp._pneumoniae_GCA_900180835.1.annotation.cds_PatKP1697_001743T0
Kleb_pneu_MGH201	ST-15	2	Kleb_pneu_subsp._pneumoniae_GCA_900180835.1_PatKP1697_001737T0	Kleb_pneu_subsp._pneumoniae_GCA_900180835.1.annotation.cds_PatKP1697_001743T0
Kleb_pneu_MGH203	ST-15	2	Kleb_pneu_subsp._pneumoniae_GCA_900180835.1_PatKP1697_001737T0	Kleb_pneu_subsp._pneumoniae_GCA_900180835.1.annotation.cds_PatKP1697_001743T0
Kleb_pneu_MGH222	ST-15	2	Kleb_pneu_subsp._pneumoniae_GCA_900180835.1_PatKP1697_001737T0	Kleb_pneu_subsp._pneumoniae_GCA_900180835.1.annotation.cds_PatKP1697_001743T0
Kleb_pneu_MGH81_V1	ST-15	2	Kleb_pneu_subsp._pneumoniae_GCA_900180835.1_PatKP1697_001737T0	Kleb_pneu_subsp._pneumoniae_GCA_900180835.1.annotation.cds_PatKP1697_001743T0
Kleb_pneu_subsp._pneumoniae_GCA_002248595.1	ST-15	2	Kleb_pneu_subsp._pneumoniae_GCA_900180835.1_PatKP1697_001737T0	Kleb_pneu_subsp._pneumoniae_GCA_900180835.1.annotation.cds_PatKP1697_001743T0
Kleb_pneu_subsp._pneumoniae_GCA_002248955.1	ST-15	2	Kleb_pneu_subsp._pneumoniae_GCA_900180835.1_PatKP1697_001737T0	Kleb_pneu_subsp._pneumoniae_GCA_900180835.1.annotation.cds_PatKP1697_001743T0
Kleb_pneu_subsp._pneumoniae_GCA_002249165.1	ST-15	2	Kleb_pneu_subsp._pneumoniae_GCA_900180835.1_PatKP1697_001737T0	Kleb_pneu_subsp._pneumoniae_GCA_900180835.1.annotation.cds_PatKP1697_001743T0
Kleb_pneu_subsp._pneumoniae_GCA_900180535.1	ST-15	2	Kleb_pneu_subsp._pneumoniae_GCA_900180835.1_PatKP1697_001737T0	Kleb_pneu_subsp._pneumoniae_GCA_900180835.1.annotation.cds_PatKP1697_001743T0
Kleb_pneu_subsp._pneumoniae_GCA_900180555.1	ST-15	2	Kleb_pneu_subsp._pneumoniae_GCA_900180835.1_PatKP1697_001737T0	Kleb_pneu_subsp._pneumoniae_GCA_900180835.1.annotation.cds_PatKP1697_001743T0
Kleb_pneu_subsp._pneumoniae_GCA_900180575.1	ST-15	2	Kleb_pneu_subsp._pneumoniae_GCA_900180835.1_PatKP1697_001737T0	Kleb_pneu_subsp._pneumoniae_GCA_900180835.1.annotation.cds_PatKP1697_001743T0
Kleb_pneu_subsp._pneumoniae_GCA_900180615.1	ST-15	2	Kleb_pneu_subsp._pneumoniae_GCA_900180835.1_PatKP1697_001737T0	Kleb_pneu_subsp._pneumoniae_GCA_900180835.1.annotation.cds_PatKP1697_001743T0
Kleb_pneu_subsp._pneumoniae_GCA_900180645.1	ST-15	2	Kleb_pneu_subsp._pneumoniae_GCA_900180835.1_PatKP1697_001737T0	Kleb_pneu_subsp._pneumoniae_GCA_900180835.1.annotation.cds_PatKP1697_001743T0
Kleb_pneu_subsp._pneumoniae_GCA_900180705.1	ST-15	2	Kleb_pneu_subsp._pneumoniae_GCA_900180835.1_PatKP1697_001737T0	Kleb_pneu_subsp._pneumoniae_GCA_900180835.1.annotation.cds_PatKP1697_001743T0
Kleb_pneu_subsp._pneumoniae_GCA_900180715.1	ST-15	2	Kleb_pneu_subsp._pneumoniae_GCA_900180835.1_PatKP1697_001737T0	Kleb_pneu_subsp._pneumoniae_GCA_900180835.1.annotation.cds_PatKP1697_001743T0
Kleb_pneu_subsp._pneumoniae_GCA_900180765.1	ST-15	2	Kleb_pneu_subsp._pneumoniae_GCA_900180835.1_PatKP1697_001737T0	Kleb_pneu_subsp._pneumoniae_GCA_900180835.1.annotation.cds_PatKP1697_001743T0
Kleb_pneu_subsp._pneumoniae_GCA_900180785.1	ST-15	2	Kleb_pneu_subsp._pneumoniae_GCA_900180835.1_PatKP1697_001737T0	Kleb_pneu_subsp._pneumoniae_GCA_900180835.1.annotation.cds_PatKP1697_001743T0
Kleb_pneu_subsp._pneumoniae_GCA_900180835.1	ST-15	2	Kleb_pneu_subsp._pneumoniae_GCA_900180835.1_PatKP1697_001737T0	Kleb_pneu_subsp._pneumoniae_GCA_900180835.1.annotation.cds_PatKP1697_001743T0
Kleb_pneu_subsp._pneumoniae_GCA_900180905.1	ST-15	2	Kleb_pneu_subsp._pneumoniae_GCA_900180835.1_PatKP1697_001737T0	Kleb_pneu_subsp._pneumoniae_GCA_900180835.1.annotation.cds_PatKP1697_001743T0
Kleb_pneu_subsp._pneumoniae_GCA_900180925.1	ST-15	2	Kleb_pneu_subsp._pneumoniae_GCA_900180835.1_PatKP1697_001737T0	Kleb_pneu_subsp._pneumoniae_GCA_900180835.1.annotation.cds_PatKP1697_001743T0
Kleb_pneu_subsp._pneumoniae_GCA_900181085.1	ST-15	2	Kleb_pneu_subsp._pneumoniae_GCA_900180835.1_PatKP1697_001737T0	Kleb_pneu_subsp._pneumoniae_GCA_900180835.1.annotation.cds_PatKP1697_001743T0
Kleb_pneu_subsp._pneumoniae_GCA_900181115.1	ST-15	2	Kleb_pneu_subsp._pneumoniae_GCA_900180835.1_PatKP1697_001737T0	Kleb_pneu_subsp._pneumoniae_GCA_900180835.1.annotation.cds_PatKP1697_001743T0
Kleb_pneu_subsp._pneumoniae_GCA_900181165.1	ST-15	2	Kleb_pneu_subsp._pneumoniae_GCA_900180835.1_PatKP1697_001737T0	Kleb_pneu_subsp._pneumoniae_GCA_900180835.1.annotation.cds_PatKP1697_001743T0
Kleb_pneu_subsp._pneumoniae_GCA_900181235.1	ST-15	2	Kleb_pneu_subsp._pneumoniae_GCA_900180835.1_PatKP1697_001737T0	Kleb_pneu_subsp._pneumoniae_GCA_900180835.1.annotation.cds_PatKP1697_001743T0
Kleb_pneu_subsp._pneumoniae_GCA_900181255.1	ST-15	2	Kleb_pneu_subsp._pneumoniae_GCA_900180835.1_PatKP1697_001737T0	Kleb_pneu_subsp._pneumoniae_GCA_900180835.1.annotation.cds_PatKP1697_001743T0
Kleb_pneu_subsp._pneumoniae_GCA_900181275.1	ST-15	2	Kleb_pneu_subsp._pneumoniae_GCA_900180835.1_PatKP1697_001737T0	Kleb_pneu_subsp._pneumoniae_GCA_900180835.1.annotation.cds_PatKP1697_001743T0
Kleb_pneu_subsp._pneumoniae_GCA_900181305.1	ST-15	2	Kleb_pneu_subsp._pneumoniae_GCA_900180835.1_PatKP1697_001737T0	Kleb_pneu_subsp._pneumoniae_GCA_900180835.1.annotation.cds_PatKP1697_001743T0
Kleb_pneu_subsp._pneumoniae_GCA_900181345.1	ST-15	2	Kleb_pneu_subsp._pneumoniae_GCA_900180835.1_PatKP1697_001737T0	Kleb_pneu_subsp._pneumoniae_GCA_900180835.1.annotation.cds_PatKP1697_001743T0
Kleb_pneu_subsp._pneumoniae_GCA_900181355.1	ST-15	2	Kleb_pneu_subsp._pneumoniae_GCA_900180835.1_PatKP1697_001737T0	Kleb_pneu_subsp._pneumoniae_GCA_900180835.1.annotation.cds_PatKP1697_001743T0
Kleb_pneu_subsp._pneumoniae_GCA_900181375.1	ST-15	2	Kleb_pneu_subsp._pneumoniae_GCA_900180835.1_PatKP1697_001737T0	Kleb_pneu_subsp._pneumoniae_GCA_900180835.1.annotation.cds_PatKP1697_001743T0
Kleb_pneu_subsp._pneumoniae_GCA_900181395.1	ST-15	2	Kleb_pneu_subsp._pneumoniae_GCA_900180835.1_PatKP1697_001737T0	Kleb_pneu_subsp._pneumoniae_GCA_900180835.1.annotation.cds_PatKP1697_001743T0
Kleb_pneu_subsp._pneumoniae_GCA_900181405.1	ST-15	2	Kleb_pneu_subsp._pneumoniae_GCA_900180835.1_PatKP1697_001737T0	Kleb_pneu_subsp._pneumoniae_GCA_900180835.1.annotation.cds_PatKP1697_001743T0
Kleb_pneu_subsp._pneumoniae_GCA_900181415.1	ST-15	2	Kleb_pneu_subsp._pneumoniae_GCA_900180835.1_PatKP1697_001737T0	Kleb_pneu_subsp._pneumoniae_GCA_900180835.1.annotation.cds_PatKP1697_001743T0
Kleb_pneu_subsp._pneumoniae_GCA_900181445.1	ST-15	2	Kleb_pneu_subsp._pneumoniae_GCA_900180835.1_PatKP1697_001737T0	Kleb_pneu_subsp._pneumoniae_GCA_900180835.1.annotation.cds_PatKP1697_001743T0
Kleb_pneu_subsp._pneumoniae_GCA_900181475.1	ST-15	2	Kleb_pneu_subsp._pneumoniae_GCA_900180835.1_PatKP1697_001737T0	Kleb_pneu_subsp._pneumoniae_GCA_900180835.1.annotation.cds_PatKP1697_001743T0
Kleb_pneu_subsp._pneumoniae_GCA_900181505.1	ST-15	2	Kleb_pneu_subsp._pneumoniae_GCA_900180835.1_PatKP1697_001737T0	Kleb_pneu_subsp._pneumoniae_GCA_900180835.1.annotation.cds_PatKP1697_001743T0
Kleb_pneu_subsp._pneumoniae_GCA_900181545.1	ST-15	2	Kleb_pneu_subsp._pneumoniae_GCA_900180835.1_PatKP1697_001737T0	Kleb_pneu_subsp._pneumoniae_GCA_900180835.1.annotation.cds_PatKP1697_001743T0
Kleb_pneu_subsp._pneumoniae_GCA_900181635.1	ST-15	2	Kleb_pneu_subsp._pneumoniae_GCA_900180835.1_PatKP1697_001737T0	Kleb_pneu_subsp._pneumoniae_GCA_900180835.1.annotation.cds_PatKP1697_001743T0
Kleb_pneu_subsp._pneumoniae_GCA_900181675.1	ST-15	2	Kleb_pneu_subsp._pneumoniae_GCA_900180835.1_PatKP1697_001737T0	Kleb_pneu_subsp._pneumoniae_GCA_900180835.1.annotation.cds_PatKP1697_001743T0
Kleb_pneu_subsp._pneumoniae_GCA_900181715.1	ST-15	2	Kleb_pneu_subsp._pneumoniae_GCA_900180835.1_PatKP1697_001737T0	Kleb_pneu_subsp._pneumoniae_GCA_900180835.1.annotation.cds_PatKP1697_001743T0
Kleb_pneu_subsp._pneumoniae_GCA_900181735.1	ST-15	2	Kleb_pneu_subsp._pneumoniae_GCA_900180835.1_PatKP1697_001737T0	Kleb_pneu_subsp._pneumoniae_GCA_900180835.1.annotation.cds_PatKP1697_001743T0
Kleb_pneu_subsp._pneumoniae_GCA_900181765.1	ST-15	2	Kleb_pneu_subsp._pneumoniae_GCA_900180835.1_PatKP1697_001737T0	Kleb_pneu_subsp._pneumoniae_GCA_900180835.1.annotation.cds_PatKP1697_001743T0
Kleb_pneu_subsp._pneumoniae_GCA_900181855.1	ST-15	2	Kleb_pneu_subsp._pneumoniae_GCA_900180835.1_PatKP1697_001737T0	Kleb_pneu_subsp._pneumoniae_GCA_900180835.1.annotation.cds_PatKP1697_001743T0
Kleb_pneu_subsp._pneumoniae_GCA_900182045.1	ST-15	2	Kleb_pneu_subsp._pneumoniae_GCA_900180835.1_PatKP1697_001737T0	Kleb_pneu_subsp._pneumoniae_GCA_900180835.1.annotation.cds_PatKP1697_001743T0
Kleb_pneu_subsp._pneumoniae_GCA_900182055.1	ST-15	2	Kleb_pneu_subsp._pneumoniae_GCA_900180835.1_PatKP1697_001737T0	Kleb_pneu_subsp._pneumoniae_GCA_900180835.1.annotation.cds_PatKP1697_001743T0
Kleb_pneu_subsp._pneumoniae_GCA_900182115.1	ST-15	2	Kleb_pneu_subsp._pneumoniae_GCA_900180835.1_PatKP1697_001737T0	Kleb_pneu_subsp._pneumoniae_GCA_900180835.1.annotation.cds_PatKP1697_001743T0
Kleb_pneu_subsp._pneumoniae_GCA_900182155.1	ST-15	2	Kleb_pneu_subsp._pneumoniae_GCA_900180835.1_PatKP1697_001737T0	Kleb_pneu_subsp._pneumoniae_GCA_900180835.1.annotation.cds_PatKP1697_001743T0
Kleb_pneu_GCA_001597245.1_V1	ST-15	3	Kleb_pneu_subsp._pneumoniae_GCA_900180835.1_PatKP1697_001737T0	Kleb_pneu_subsp._pneumoniae_GCA_900180835.1.annotation.cds_PatKP1697_001743T0
Kleb_pneu_subsp._pneumoniae_GCA_900182025.1	ST-15	3	Kleb_pneu_subsp._pneumoniae_GCA_900180835.1_PatKP1697_001737T0	Kleb_pneu_subsp._pneumoniae_GCA_900180835.1.annotation.cds_PatKP1697_001743T0
Kleb_pneu_UCI116_V1	ST-15	3	Kleb_pneu_subsp._pneumoniae_GCA_900180835.1_PatKP1697_001737T0	Kleb_pneu_subsp._pneumoniae_GCA_900180835.1.annotation.cds_PatKP1697_001743T0
Kleb_Pneu_UCI96_V1	ST-15	3	Kleb_pneu_subsp._pneumoniae_GCA_900180835.1_PatKP1697_001737T0	Kleb_pneu_subsp._pneumoniae_GCA_900180835.1.annotation.cds_PatKP1697_001743T0
Kleb_pneu_GCA_000710095.1_V1	ST-152	0
Kleb_pneu_GCA_002411905.1	ST-152	0
Kleb_pneu_GCA_002416615.1	ST-152	0
Kleb_pneu_GCA_002416985.1	ST-152	0
Kleb_pneu_GCA_002417015.1	ST-152	0
Kleb_pneu_GCA_002417165.1	ST-152	0
Kleb_pneu_GCA_002417175.1	ST-152	0
Kleb_pneu_GCA_002417395.1	ST-152	0
Kleb_pneu_GCA_002510145.1	ST-152	0
Kleb_pneu_GCA_002636215.1	ST-152	0
Kleb_pneu_GCA_900084695.1_V1	ST-152	0
Kleb_pneu_MGH158_V1	ST-152	0
Kleb_pneu_GCA_900086265.1_V1	ST-158	0
Kleb_pneu_BIDMC91_V1	ST-16	0
Kleb_pneu_BWH58_V1	ST-16	0
Kleb_pneu_BWH66_V1	ST-16	0
Kleb_pneu_GCA_000821365.1_V1	ST-16	0
Kleb_pneu_GCA_000822025.1_V1	ST-16	0
Kleb_pneu_GCA_001482605.1_V1	ST-16	0
Kleb_pneu_GCA_001721725.1_V1	ST-16	0
Kleb_pneu_GCA_001741545.1_V1	ST-16	0
Kleb_pneu_GCA_001741665.1_V1	ST-16	0
Kleb_pneu_GCA_002180655.1	ST-16	0
Kleb_pneu_GCA_002182045.1	ST-16	0
Kleb_pneu_GCA_002184485.1	ST-16	0
Kleb_pneu_GCA_002186805.1	ST-16	0
Kleb_pneu_GCA_002187805.1	ST-16	0
Kleb_pneu_GCA_002257775.1	ST-16	0
Kleb_pneu_GCA_002257875.1	ST-16	0
Kleb_pneu_GCA_002635725.1	ST-16	0
Kleb_pneu_GCA_900084125.1_V1	ST-16	0
Kleb_pneu_GCA_900084145.1_V1	ST-16	0
Kleb_pneu_GCA_900084265.1_V1	ST-16	0
Kleb_pneu_GCA_900084495.1_V1	ST-16	0
Kleb_pneu_GCA_900084525.1_V1	ST-16	0
Kleb_pneu_GCA_900084535.1_V1	ST-16	0
Kleb_pneu_GCA_900085155.1_V1	ST-16	0
Kleb_pneu_GCA_900085345.1_V1	ST-16	0
Kleb_pneu_GCA_900085845.1_V1	ST-16	0
Kleb_pneu_GCA_900086375.1_V1	ST-16	0
Kleb_pneu_GCA_900092895.1_V1	ST-16	0
Kleb_pneu_GCA_900093065.1_V1	ST-16	0
Kleb_pneu_GCA_900093205.1_V1	ST-16	0
Kleb_pneu_GCA_900093225.1_V1	ST-16	0
Kleb_pneu_MGH165_V1	ST-16	0
Kleb_pneu_subsp._pneumoniae_GCA_002239705.1	ST-16	0
Kleb_pneu_subsp._pneumoniae_GCA_002246035.1	ST-16	0
Kleb_pneu_subsp._pneumoniae_GCA_002246045.1	ST-16	0
Kleb_pneu_subsp._pneumoniae_GCA_002246275.1	ST-16	0
Kleb_pneu_subsp._pneumoniae_GCA_002246285.1	ST-16	0
Kleb_pneu_subsp._pneumoniae_GCA_002246315.1	ST-16	0
Kleb_pneu_subsp._pneumoniae_GCA_002246325.1	ST-16	0
Kleb_pneu_subsp._pneumoniae_GCA_002246365.1	ST-16	0
Kleb_pneu_subsp._pneumoniae_GCA_002246555.1	ST-16	0
Kleb_pneu_subsp._pneumoniae_GCA_002246575.1	ST-16	0
Kleb_pneu_subsp._pneumoniae_GCA_002246695.1	ST-16	0
Kleb_pneu_subsp._pneumoniae_GCA_002246875.1	ST-16	0
Kleb_pneu_subsp._pneumoniae_GCA_002247365.1	ST-16	0
Kleb_pneu_subsp._pneumoniae_GCA_002247375.1	ST-16	0
Kleb_pneu_subsp._pneumoniae_GCA_002248505.1	ST-16	0
Kleb_pneu_subsp._pneumoniae_GCA_002248625.1	ST-16	0
Kleb_pneu_UCI189	ST-16	0
Kleb_pneu_UCI198	ST-16	0
Kleb_pneu_GCA_000822105.1_V1	ST-160	2	Kleb_pneu_GCA_000822105.1_V1_PatKP199_004801T0	Kleb_pneu_GCA_000822105.1_V1.annotation.cds_PatKP199_004795T0
Kleb_pneu_GCA_001597035.1_V1	ST-163	1	Kleb_pneu_GCA_001597035.1_V1_PatKP451_000153T0	Kleb_pneu_GCA_001597035.1_V1.annotation.cds_PatKP451_000147T0
Kleb_pneu_GCA_900084715.1_V1	ST-163	1	Kleb_pneu_GCA_001597035.1_V1_PatKP451_000153T0	Kleb_pneu_GCA_001597035.1_V1.annotation.cds_PatKP451_000147T0
Kleb_pneu_GCA_002180255.1	ST-163	1	Kleb_pneu_GCA_001597035.1_V1_PatKP451_000153T0	Kleb_pneu_GCA_002180255.1.annotation.cds_PatKP2106_002538T0
Kleb_pneu_BIDMC_35_V1	ST-17	0
Kleb_pneu_BIDMC_69_V1	ST-17	0
Kleb_pneu_BWH_48_V1	ST-17	0
Kleb_pneu_GCA_000775955.1_V1	ST-17	0
Kleb_pneu_GCA_001463555.1_V1	ST-17	0
Kleb_pneu_GCA_001463665.1_V1	ST-17	0
Kleb_pneu_GCA_001698945.1_V1	ST-17	0
Kleb_pneu_GCA_001699015.1_V1	ST-17	0
Kleb_pneu_GCA_001699025.1_V1	ST-17	0
Kleb_pneu_GCA_001699035.1_V1	ST-17	0
Kleb_pneu_GCA_001699045.1_V1	ST-17	0
Kleb_pneu_GCA_001699095.1_V1	ST-17	0
Kleb_pneu_GCA_001699105.1_V1	ST-17	0
Kleb_pneu_GCA_001701585.1_V1	ST-17	0
Kleb_pneu_GCA_001701615.1_V1	ST-17	0
Kleb_pneu_GCA_001875075.1_V1	ST-17	0
Kleb_pneu_GCA_002180645.1	ST-17	0
Kleb_pneu_GCA_002181895.1	ST-17	0
Kleb_pneu_GCA_002181915.1	ST-17	0
Kleb_pneu_GCA_002181945.1	ST-17	0
Kleb_pneu_GCA_002181955.1	ST-17	0
Kleb_pneu_GCA_002186625.1	ST-17	0
Kleb_pneu_GCA_002186665.1	ST-17	0
Kleb_pneu_GCA_002187145.1	ST-17	0
Kleb_pneu_GCA_002187245.1	ST-17	0
Kleb_pneu_GCA_002187685.1	ST-17	0
Kleb_pneu_GCA_002269925.1	ST-17	0
Kleb_pneu_GCA_002411885.1	ST-17	0
Kleb_pneu_GCA_900084965.1_V1	ST-17	0
Kleb_pneu_GCA_900085615.1_V1	ST-17	0
Kleb_pneu_GCA_900085635.1_V1	ST-17	0
Kleb_pneu_GCA_900087895.1_V1	ST-17	0
Kleb_pneu_MGH_60_V1	ST-17	0
Kleb_pneu_MGH228	ST-17	0
Kleb_pneu_subsp._pneumoniae_GCA_900180505.1	ST-17	0
Kleb_pneu_subsp._pneumoniae_GCA_900180545.1	ST-17	0
Kleb_pneu_subsp._pneumoniae_GCA_900180825.1	ST-17	0
Kleb_pneu_UCI_64_V1	ST-17	0
Kleb_pneu_UCI_7_V1	ST-17	0
Kleb_pneu_subsp._pneumoniae_GCA_002248045.1	ST-17	1
Kleb_pneu_BIDMC_25_V1	ST-186	0
Kleb_pneu_GCA_001463295.1_V1	ST-187	0
Kleb_pneu_GCA_002184955.1	ST-188	0
Kleb_pneu_GCA_900172605.1_V1	ST-188	0
Kleb_pneu_GCA_900085655.1_V1	ST-188	1
Kleb_pneu_GCA_001907955.1_V1	ST-198	0
Kleb_pneu_GCA_001982515.1_V1	ST-198	0
Kleb_pneu_GCA_002157345.1	ST-198	0
Kleb_pneu_GCA_002241035.1	ST-198	0
Kleb_pneu_GCA_900092705.1_V1	ST-199	0
Kleb_pneu_MRSN_1319_GCA_000773875.1_V1	ST-199	0
Kleb_pneu_GCA_000823085.1_V1	ST-20	0
Kleb_pneu_GCA_001038365.1_V1	ST-20	0
Kleb_pneu_GCA_001902815.1_V1	ST-20	0
Kleb_pneu_GCA_002186545.1	ST-20	0
Kleb_pneu_GCA_900084805.1_V1	ST-20	0
Kleb_pneu_GCA_900172565.1_V1	ST-20	0
Kleb_pneu_GCA_900173305.1_V1	ST-20	0
Kleb_pneu_GCA_900173335.1_V1	ST-20	0
Kleb_pneu_GCA_900173345.1_V1	ST-20	0
Kleb_pneu_GCA_900173365.1_V1	ST-20	0
Kleb_pneu_GCA_900173905.1_V1	ST-20	0
Kleb_pneu_MGH_18_V1	ST-20	0
Kleb_pneu_MGH_70_V1	ST-20	0
Kleb_pneu_MGH221	ST-20	0
Kleb_pneu_MGH229	ST-20	0
Kleb_pneu_MGH235	ST-20	0
Kleb_pneu_UCICRE-124	ST-20	0
Kleb_pneu_GCA_001876675.1_V1	ST-200	0
Kleb_pneu_GCA_900086495.1_V1	ST-200	0
Kleb_pneu_UCI192	ST-200	0
Kleb_pneu_GCA_900085645.1_V1	ST-215	0
Kleb_pneu_GCA_002182205.1	ST-219	0
Kleb_pneu_GCA_900171735.1_V1	ST-219	0
Kleb_pneu_GCA_900171825.1_V1	ST-219	0
Kleb_pneu_GCA_002185885.1	ST-22	0
Kleb_pneu_subsp._pneumoniae_GCA_900181385.1	ST-22	0
Kleb_pneu_subsp._pneumoniae_GCA_900181425.1	ST-22	0
Kleb_pneu_subsp._pneumoniae_GCA_900181435.1	ST-22	0
Kleb_pneu_subsp._pneumoniae_GCA_900181485.1	ST-22	0
Kleb_pneu_GCA_900085735.1_V1	ST-221	0
Kleb_pneu_11227-1_GCA_000699345.1_V1	ST-228	1	Kleb_pneu_GCA_900084735.1_V1_PatKP859_001299T0	Kleb_pneu_11227-1_GCA_000699345.1_V1.annotation.cds_PatKP116_001230T0
Kleb_pneu_GCA_001902335.1_V1	ST-23	0
Kleb_pneu_GCA_001970155.1_V1	ST-23	0
Kleb_pneu_BIDMC86_V1	ST-23	1	Kleb_pneu_GCA_900174075.1_V1_PatKP1328_001640T0	Kleb_pneu_subsp._pneumoniae_GCA_900180835.1.annotation.cds_PatKP1697_001743T0
Kleb_pneu_GCA_001708225.1_V1	ST-23	1	Kleb_pneu_GCA_900174075.1_V1_PatKP1328_001640T0	Kleb_pneu_subsp._pneumoniae_GCA_900180835.1.annotation.cds_PatKP1697_001743T0
Kleb_pneu_subsp._pneumoniae_NTUH-K2044_GCA_000009885.1_V1	ST-23	1	Kleb_pneu_GCA_900174075.1_V1_PatKP1328_001640T0	Kleb_pneu_subsp._pneumoniae_GCA_900180835.1.annotation.cds_PatKP1697_001743T0
Kleb_pneu_UCI110_V1	ST-23	1	Kleb_pneu_GCA_900174075.1_V1_PatKP1328_001640T0	Kleb_pneu_subsp._pneumoniae_GCA_900180835.1.annotation.cds_PatKP1697_001743T0
Kleb_pneu_GCA_001720635.1_V1	ST-23	2	Kleb_pneu_GCA_001720635.1_V1_PatKP557_003620T0	Kleb_pneu_GCA_001720635.1_V1.annotation.cds_PatKP557_003627T0
Kleb_pneu_BIDMC85_V1	ST-23	2	Kleb_pneu_GCA_900174075.1_V1_PatKP1328_001640T0	Kleb_pneu_subsp._pneumoniae_GCA_900180835.1.annotation.cds_PatKP1697_001743T0
Kleb_pneu_GCA_001708245.1_V1	ST-23	2	Kleb_pneu_GCA_900174075.1_V1_PatKP1328_001640T0	Kleb_pneu_subsp._pneumoniae_GCA_900180835.1.annotation.cds_PatKP1697_001743T0
Kleb_pneu_GCA_001939855.1_V1	ST-23	2	Kleb_pneu_GCA_900174075.1_V1_PatKP1328_001640T0	Kleb_pneu_subsp._pneumoniae_GCA_900180835.1.annotation.cds_PatKP1697_001743T0
Kleb_pneu_GCA_002264195.1	ST-23	2	Kleb_pneu_GCA_900174075.1_V1_PatKP1328_001640T0	Kleb_pneu_subsp._pneumoniae_GCA_900180835.1.annotation.cds_PatKP1697_001743T0
Kleb_pneu_GCA_002264435.1	ST-23	2	Kleb_pneu_GCA_900174075.1_V1_PatKP1328_001640T0	Kleb_pneu_subsp._pneumoniae_GCA_900180835.1.annotation.cds_PatKP1697_001743T0
Kleb_pneu_GCA_002369925.1	ST-23	2	Kleb_pneu_GCA_900174075.1_V1_PatKP1328_001640T0	Kleb_pneu_subsp._pneumoniae_GCA_900180835.1.annotation.cds_PatKP1697_001743T0
Kleb_pneu_GCA_002761315.1	ST-23	2	Kleb_pneu_GCA_900174075.1_V1_PatKP1328_001640T0	Kleb_pneu_subsp._pneumoniae_GCA_900180835.1.annotation.cds_PatKP1697_001743T0
Kleb_pneu_GCA_900092925.1_V1	ST-23	2	Kleb_pneu_GCA_900174075.1_V1_PatKP1328_001640T0	Kleb_pneu_subsp._pneumoniae_GCA_900180835.1.annotation.cds_PatKP1697_001743T0
Kleb_pneu_GCA_900092945.1_V1	ST-23	2	Kleb_pneu_GCA_900174075.1_V1_PatKP1328_001640T0	Kleb_pneu_subsp._pneumoniae_GCA_900180835.1.annotation.cds_PatKP1697_001743T0
Kleb_pneu_GCA_900093185.1_V1	ST-23	2	Kleb_pneu_GCA_900174075.1_V1_PatKP1328_001640T0	Kleb_pneu_subsp._pneumoniae_GCA_900180835.1.annotation.cds_PatKP1697_001743T0
Kleb_pneu_GCA_900174045.1_V1	ST-23	2	Kleb_pneu_GCA_900174075.1_V1_PatKP1328_001640T0	Kleb_pneu_subsp._pneumoniae_GCA_900180835.1.annotation.cds_PatKP1697_001743T0
Kleb_pneu_GCA_900174055.1_V1	ST-23	2	Kleb_pneu_GCA_900174075.1_V1_PatKP1328_001640T0	Kleb_pneu_subsp._pneumoniae_GCA_900180835.1.annotation.cds_PatKP1697_001743T0
Kleb_pneu_GCA_900174065.1_V1	ST-23	2	Kleb_pneu_GCA_900174075.1_V1_PatKP1328_001640T0	Kleb_pneu_subsp._pneumoniae_GCA_900180835.1.annotation.cds_PatKP1697_001743T0
Kleb_pneu_GCA_900174075.1_V1	ST-23	2	Kleb_pneu_GCA_900174075.1_V1_PatKP1328_001640T0	Kleb_pneu_subsp._pneumoniae_GCA_900180835.1.annotation.cds_PatKP1697_001743T0
Kleb_pneu_GCA_900174085.1_V1	ST-23	2	Kleb_pneu_GCA_900174075.1_V1_PatKP1328_001640T0	Kleb_pneu_subsp._pneumoniae_GCA_900180835.1.annotation.cds_PatKP1697_001743T0
Kleb_pneu_GCA_900174095.1_V1	ST-23	2	Kleb_pneu_GCA_900174075.1_V1_PatKP1328_001640T0	Kleb_pneu_subsp._pneumoniae_GCA_900180835.1.annotation.cds_PatKP1697_001743T0
Kleb_pneu_GCA_900174105.1_V1	ST-23	2	Kleb_pneu_GCA_900174075.1_V1_PatKP1328_001640T0	Kleb_pneu_subsp._pneumoniae_GCA_900180835.1.annotation.cds_PatKP1697_001743T0
Kleb_pneu_GCA_900174125.1_V1	ST-23	2	Kleb_pneu_GCA_900174075.1_V1_PatKP1328_001640T0	Kleb_pneu_subsp._pneumoniae_GCA_900180835.1.annotation.cds_PatKP1697_001743T0
Kleb_pneu_GCA_900174135.1_V1	ST-23	2	Kleb_pneu_GCA_900174075.1_V1_PatKP1328_001640T0	Kleb_pneu_subsp._pneumoniae_GCA_900180835.1.annotation.cds_PatKP1697_001743T0
Kleb_pneu_GCA_900174145.1_V1	ST-23	2	Kleb_pneu_GCA_900174075.1_V1_PatKP1328_001640T0	Kleb_pneu_subsp._pneumoniae_GCA_900180835.1.annotation.cds_PatKP1697_001743T0
Kleb_pneu_GCA_900174155.1_V1	ST-23	2	Kleb_pneu_GCA_900174075.1_V1_PatKP1328_001640T0	Kleb_pneu_subsp._pneumoniae_GCA_900180835.1.annotation.cds_PatKP1697_001743T0
Kleb_pneu_MGH94_V1	ST-23	2	Kleb_pneu_GCA_900174075.1_V1_PatKP1328_001640T0	Kleb_pneu_subsp._pneumoniae_GCA_900180835.1.annotation.cds_PatKP1697_001743T0
Kleb_pneu_subsp._pneumoniae_1084_GCA_000294365.1_V1	ST-23	2	Kleb_pneu_GCA_900174075.1_V1_PatKP1328_001640T0	Kleb_pneu_subsp._pneumoniae_GCA_900180835.1.annotation.cds_PatKP1697_001743T0
Kleb_pneu_subsp._pneumoniae_GCA_001529935.1_V1	ST-23	2	Kleb_pneu_GCA_900174075.1_V1_PatKP1328_001640T0	Kleb_pneu_subsp._pneumoniae_GCA_900180835.1.annotation.cds_PatKP1697_001743T0
Kleb_pneu_subsp._pneumoniae_GCA_002163895.1	ST-23	2	Kleb_pneu_GCA_900174075.1_V1_PatKP1328_001640T0	Kleb_pneu_subsp._pneumoniae_GCA_900180835.1.annotation.cds_PatKP1697_001743T0
Kleb_pneu_subsp._pneumoniae_GCA_002210445.1	ST-23	2	Kleb_pneu_GCA_900174075.1_V1_PatKP1328_001640T0	Kleb_pneu_subsp._pneumoniae_GCA_900180835.1.annotation.cds_PatKP1697_001743T0
Kleb_pneu_UCI196	ST-23	2	Kleb_pneu_GCA_900174075.1_V1_PatKP1328_001640T0	Kleb_pneu_subsp._pneumoniae_GCA_900180835.1.annotation.cds_PatKP1697_001743T0
Kleb_pneu_GCA_001870615.1_V1	ST-231	0
Kleb_pneu_GCA_001875525.1_V1	ST-231	0
Kleb_pneu_GCA_001875545.1_V1	ST-231	0
Kleb_pneu_GCA_001879315.1_V1	ST-231	0
Kleb_pneu_GCA_001879335.1_V1	ST-231	0
Kleb_pneu_GCA_001984895.1_V1	ST-231	0
Kleb_pneu_GCA_002119075.1	ST-231	0
Kleb_pneu_GCA_002188185.1	ST-231	0
Kleb_pneu_GCA_002237985.1	ST-231	0
Kleb_pneu_GCA_002374295.1	ST-231	0
Kleb_pneu_GCA_002383765.1	ST-231	0
Kleb_pneu_GCA_002406545.1	ST-231	0
Kleb_pneu_GCA_002406585.1	ST-231	0
Kleb_pneu_GCA_002406605.1	ST-231	0
Kleb_pneu_GCA_002406625.1	ST-231	0
Kleb_pneu_GCA_002406945.1	ST-231	0
Kleb_pneu_GCA_002406965.1	ST-231	0
Kleb_pneu_GCA_002406975.1	ST-231	0
Kleb_pneu_GCA_002406995.1	ST-231	0
Kleb_pneu_GCA_900085585.1_V1	ST-231	0
Kleb_pneu_GCA_900092965.1_V1	ST-231	0
Kleb_pneu_subsp._pneumoniae_GCA_002239805.1	ST-231	0
Kleb_pneu_subsp._pneumoniae_GCA_002239815.1	ST-231	0
Kleb_pneu_subsp._pneumoniae_GCA_002246125.1	ST-231	0
Kleb_pneu_subsp._pneumoniae_GCA_002246155.1	ST-231	0
Kleb_pneu_subsp._pneumoniae_GCA_002246355.1	ST-231	0
Kleb_pneu_subsp._pneumoniae_GCA_002246435.1	ST-231	0
Kleb_pneu_subsp._pneumoniae_GCA_002246455.1	ST-231	0
Kleb_pneu_subsp._pneumoniae_GCA_002246475.1	ST-231	0
Kleb_pneu_subsp._pneumoniae_GCA_002246655.1	ST-231	0
Kleb_pneu_subsp._pneumoniae_GCA_002246685.1	ST-231	0
Kleb_pneu_subsp._pneumoniae_GCA_002246765.1	ST-231	0
Kleb_pneu_subsp._pneumoniae_GCA_002246845.1	ST-231	0
Kleb_pneu_subsp._pneumoniae_GCA_002247385.1	ST-231	0
Kleb_pneu_subsp._pneumoniae_GCA_002251895.1	ST-231	0
Kleb_pneu_GCA_900093015.1_V1	ST-234	2		Kleb_pneu_GCA_900093015.1_V1.annotation.cds_PatKP1072_003822T0
Kleb_pneu_GCA_002417065.1	ST-234	2	Kleb_pneu_GCA_002055765.1_V1_PatKP768_001234T0
Kleb_pneu_GCA_002055765.1_V1	ST-234	2	Kleb_pneu_GCA_002055765.1_V1_PatKP768_001234T0	Kleb_pneu_GCA_002055765.1_V1.annotation.cds_PatKP768_001228T0
Kleb_pneu_UCI186	ST-239	0
Kleb_pneu_MGH192	ST-240	1	Kleb_pneu_GCA_900084735.1_V1_PatKP859_001299T0	Kleb_pneu_GCA_900086005.1_V1.annotation.cds_PatKP984_004004T0
Kleb_pneu_GCA_001908515.1_V1	ST-244	0
Kleb_pneu_GCA_001874715.1_V1	ST-244	1		Kleb_pneu_GCA_001874715.1_V1.annotation.cds_PatKP585_003304T0
Kleb_pneu_GCA_002185975.1	ST-247	0
Kleb_pneu_BWH62_V1	ST-25	0
Kleb_pneu_GCA_002186705.1	ST-25	0
Kleb_pneu_GCA_002186945.1	ST-25	0
Kleb_pneu_GCA_002187375.1	ST-25	0
Kleb_pneu_GCA_002187655.1	ST-25	0
Kleb_pneu_GCA_002187715.1	ST-25	0
Kleb_pneu_GCA_002188235.1	ST-25	0
Kleb_pneu_GCA_002417255.1	ST-25	0
Kleb_pneu_subsp._pneumoniae_GCA_900181095.1	ST-25	0
Kleb_pneu_subsp._pneumoniae_GCA_900181295.1	ST-25	0
Kleb_pneu_BWH67_V1	ST-251	0
Kleb_pneu_GCA_001661895.1_V1	ST-252	0
Kleb_pneu_GCA_900084105.1_V1	ST-252	0
Kleb_pneu_GCA_900085685.1_V1	ST-252	0
Kleb_pneu_GCA_900085865.1_V1	ST-253	1	Kleb_pneu_GCA_001597035.1_V1_PatKP451_000153T0	Kleb_pneu_GCA_001597035.1_V1.annotation.cds_PatKP451_000147T0
Kleb_pneu_120_1020_GCA_000417385.1_V1	ST-258	0
Kleb_pneu_140_1040_GCA_000417405.1_V1	ST-258	0
Kleb_pneu_160_1080_GCA_000417365.1_V1	ST-258	0
Kleb_pneu_160_1080_GCA_000709165.1_V1	ST-258	0
Kleb_pneu_280_1220_GCA_000417425.1_V1	ST-258	0
Kleb_pneu_30660-NJST258_1_GCA_000598005.1_V1	ST-258	0
Kleb_pneu_30684-NJST258_2_GCA_000597905.1_V1	ST-258	0
Kleb_pneu_361_1301_GCA_000406485.1_V1	ST-258	0
Kleb_pneu_440_1540_GCA_000406745.1_V1	ST-258	0
Kleb_pneu_500_1420_GCA_000406765.2_V1	ST-258	0
Kleb_pneu_646_1568_GCA_000406885.1_V1	ST-258	0
Kleb_pneu_ATCC_BAA-1705_GCA_000349265.2_V1	ST-258	0
Kleb_pneu_BIDMC_1_V1	ST-258	0
Kleb_pneu_BIDMC_10_V1	ST-258	0
Kleb_pneu_BIDMC_12A_V1	ST-258	0
Kleb_pneu_BIDMC_12B_V1	ST-258	0
Kleb_pneu_BIDMC_12C_V1	ST-258	0
Kleb_pneu_BIDMC_13_V1	ST-258	0
Kleb_pneu_BIDMC_14_V1	ST-258	0
Kleb_pneu_BIDMC_16_V1	ST-258	0
Kleb_pneu_BIDMC_18A_V1	ST-258	0
Kleb_pneu_BIDMC_18B_V1	ST-258	0
Kleb_pneu_BIDMC_18C_V1	ST-258	0
Kleb_pneu_BIDMC_2A_V1	ST-258	0
Kleb_pneu_BIDMC_32_V1	ST-258	0
Kleb_pneu_BIDMC_34_V1	ST-258	0
Kleb_pneu_BIDMC_4_V1	ST-258	0
Kleb_pneu_BIDMC_42a_V1	ST-258	0
Kleb_pneu_BIDMC_42b_V1	ST-258	0
Kleb_pneu_BIDMC_45_V1	ST-258	0
Kleb_pneu_BIDMC_5_V1	ST-258	0
Kleb_pneu_BIDMC_54_V1	ST-258	0
Kleb_pneu_BIDMC_60_V1	ST-258	0
Kleb_pneu_BIDMC_68_V1	ST-258	0
Kleb_pneu_BIDMC_7A_V1	ST-258	0
Kleb_pneu_BIDMC_7B_V1	ST-258	0
Kleb_pneu_BWH_22_V1	ST-258	0
Kleb_pneu_BWH_36_V1	ST-258	0
Kleb_pneu_BWH_41_V1	ST-258	0
Kleb_pneu_BWH_45_V1	ST-258	0
Kleb_pneu_BWH_47_V1	ST-258	0
Kleb_pneu_BWH53_V1	ST-258	0
Kleb_pneu_DMC0526_GCA_000409065.1_V1	ST-258	0
Kleb_pneu_DMC1097_GCA_000417225.2_V1	ST-258	0
Kleb_pneu_DMC1316_GCA_000417205.1_V1	ST-258	0
Kleb_pneu_GCA_000738865.1_V1	ST-258	0
Kleb_pneu_GCA_000738875.1_V1	ST-258	0
Kleb_pneu_GCA_000807395.3_V1	ST-258	0
Kleb_pneu_GCA_000807475.2_V1	ST-258	0
Kleb_pneu_GCA_000807495.2_V1	ST-258	0
Kleb_pneu_GCA_000814305.1_V1	ST-258	0
Kleb_pneu_GCA_000821485.1_V1	ST-258	0
Kleb_pneu_GCA_000821525.1_V1	ST-258	0
Kleb_pneu_GCA_000822205.1_V1	ST-258	0
Kleb_pneu_GCA_000822285.1_V1	ST-258	0
Kleb_pneu_GCA_000822325.1_V1	ST-258	0
Kleb_pneu_GCA_000822565.1_V1	ST-258	0
Kleb_pneu_GCA_000822585.1_V1	ST-258	0
Kleb_pneu_GCA_000822605.1_V1	ST-258	0
Kleb_pneu_GCA_000822645.1_V1	ST-258	0
Kleb_pneu_GCA_001022235.1_V1	ST-258	0
Kleb_pneu_GCA_001182405.1_V1	ST-258	0
Kleb_pneu_GCA_001182425.1_V1	ST-258	0
Kleb_pneu_GCA_001182445.1_V1	ST-258	0
Kleb_pneu_GCA_001182465.1_V1	ST-258	0
Kleb_pneu_GCA_001182485.1_V1	ST-258	0
Kleb_pneu_GCA_001182505.1_V1	ST-258	0
Kleb_pneu_GCA_001238585.1_V1	ST-258	0
Kleb_pneu_GCA_001275285.1_V1	ST-258	0
Kleb_pneu_GCA_001275295.1_V1	ST-258	0
Kleb_pneu_GCA_001275305.1_V1	ST-258	0
Kleb_pneu_GCA_001462525.1_V1	ST-258	0
Kleb_pneu_GCA_001462545.1_V1	ST-258	0
Kleb_pneu_GCA_001462555.1_V1	ST-258	0
Kleb_pneu_GCA_001462605.1_V1	ST-258	0
Kleb_pneu_GCA_001462615.1_V1	ST-258	0
Kleb_pneu_GCA_001462645.1_V1	ST-258	0
Kleb_pneu_GCA_001462655.1_V1	ST-258	0
Kleb_pneu_GCA_001462685.1_V1	ST-258	0
Kleb_pneu_GCA_001462765.1_V1	ST-258	0
Kleb_pneu_GCA_001462785.1_V1	ST-258	0
Kleb_pneu_GCA_001462795.1_V1	ST-258	0
Kleb_pneu_GCA_001462865.1_V1	ST-258	0
Kleb_pneu_GCA_001463055.1_V1	ST-258	0
Kleb_pneu_GCA_001463285.1_V1	ST-258	0
Kleb_pneu_GCA_001463415.1_V1	ST-258	0
Kleb_pneu_GCA_001471835.1_V1	ST-258	0
Kleb_pneu_GCA_001482995.1_V1	ST-258	0
Kleb_pneu_GCA_001483005.1_V1	ST-258	0
Kleb_pneu_GCA_001483105.1_V1	ST-258	0
Kleb_pneu_GCA_001510995.1_V1	ST-258	0
Kleb_pneu_GCA_001511035.1_V1	ST-258	0
Kleb_pneu_GCA_001511055.1_V1	ST-258	0
Kleb_pneu_GCA_001511095.1_V1	ST-258	0
Kleb_pneu_GCA_001511115.1_V1	ST-258	0
Kleb_pneu_GCA_001511135.1_V1	ST-258	0
Kleb_pneu_GCA_001511155.1_V1	ST-258	0
Kleb_pneu_GCA_001511175.1_V1	ST-258	0
Kleb_pneu_GCA_001511215.1_V1	ST-258	0
Kleb_pneu_GCA_001511255.1_V1	ST-258	0
Kleb_pneu_GCA_001511275.1_V1	ST-258	0
Kleb_pneu_GCA_001511295.1_V1	ST-258	0
Kleb_pneu_GCA_001511315.1_V1	ST-258	0
Kleb_pneu_GCA_001511335.1_V1	ST-258	0
Kleb_pneu_GCA_001511355.1_V1	ST-258	0
Kleb_pneu_GCA_001511375.1_V1	ST-258	0
Kleb_pneu_GCA_001511395.1_V1	ST-258	0
Kleb_pneu_GCA_001511415.1_V1	ST-258	0
Kleb_pneu_GCA_001511435.1_V1	ST-258	0
Kleb_pneu_GCA_001511455.1_V1	ST-258	0
Kleb_pneu_GCA_001511475.1_V1	ST-258	0
Kleb_pneu_GCA_001511495.1_V1	ST-258	0
Kleb_pneu_GCA_001511535.1_V1	ST-258	0
Kleb_pneu_GCA_001511555.1_V1	ST-258	0
Kleb_pneu_GCA_001511575.1_V1	ST-258	0
Kleb_pneu_GCA_001511595.1_V1	ST-258	0
Kleb_pneu_GCA_001511635.1_V1	ST-258	0
Kleb_pneu_GCA_001511675.1_V1	ST-258	0
Kleb_pneu_GCA_001511695.1_V1	ST-258	0
Kleb_pneu_GCA_001511715.1_V1	ST-258	0
Kleb_pneu_GCA_001511735.1_V1	ST-258	0
Kleb_pneu_GCA_001517715.1_V1	ST-258	0
Kleb_pneu_GCA_001517725.1_V1	ST-258	0
Kleb_pneu_GCA_001517735.1_V1	ST-258	0
Kleb_pneu_GCA_001517745.1_V1	ST-258	0
Kleb_pneu_GCA_001517795.1_V1	ST-258	0
Kleb_pneu_GCA_001517805.1_V1	ST-258	0
Kleb_pneu_GCA_001517955.1_V1	ST-258	0
Kleb_pneu_GCA_001666005.1_V1	ST-258	0
Kleb_pneu_GCA_001666015.1_V1	ST-258	0
Kleb_pneu_GCA_001667545.1_V1	ST-258	0
Kleb_pneu_GCA_001675125.1_V1	ST-258	0
Kleb_pneu_GCA_001695655.1_V1	ST-258	0
Kleb_pneu_GCA_001701355.1_V1	ST-258	0
Kleb_pneu_GCA_001701365.1_V1	ST-258	0
Kleb_pneu_GCA_001701395.1_V1	ST-258	0
Kleb_pneu_GCA_001701415.1_V1	ST-258	0
Kleb_pneu_GCA_001701445.1_V1	ST-258	0
Kleb_pneu_GCA_001701475.1_V1	ST-258	0
Kleb_pneu_GCA_001701505.1_V1	ST-258	0
Kleb_pneu_GCA_001701525.1_V1	ST-258	0
Kleb_pneu_GCA_001701555.1_V1	ST-258	0
Kleb_pneu_GCA_001701815.1_V1	ST-258	0
Kleb_pneu_GCA_001701845.1_V1	ST-258	0
Kleb_pneu_GCA_001701925.1_V1	ST-258	0
Kleb_pneu_GCA_001701975.1_V1	ST-258	0
Kleb_pneu_GCA_001702005.1_V1	ST-258	0
Kleb_pneu_GCA_001702035.1_V1	ST-258	0
Kleb_pneu_GCA_001702045.1_V1	ST-258	0
Kleb_pneu_GCA_001874725.1_V1	ST-258	0
Kleb_pneu_GCA_001875025.1_V1	ST-258	0
Kleb_pneu_GCA_001875045.2	ST-258	0
Kleb_pneu_GCA_001875055.2	ST-258	0
Kleb_pneu_GCA_001902195.1_V1	ST-258	0
Kleb_pneu_GCA_001902215.1_V1	ST-258	0
Kleb_pneu_GCA_001902235.1_V1	ST-258	0
Kleb_pneu_GCA_001902255.1_V1	ST-258	0
Kleb_pneu_GCA_001902765.3	ST-258	0
Kleb_pneu_GCA_001902835.1_V1	ST-258	0
Kleb_pneu_GCA_001902855.1_V1	ST-258	0
Kleb_pneu_GCA_001902875.1_V1	ST-258	0
Kleb_pneu_GCA_001902905.1_V1	ST-258	0
Kleb_pneu_GCA_001902945.1_V1	ST-258	0
Kleb_pneu_GCA_001902965.1_V1	ST-258	0
Kleb_pneu_GCA_001903015.1_V1	ST-258	0
Kleb_pneu_GCA_001903025.1_V1	ST-258	0
Kleb_pneu_GCA_001903045.3	ST-258	0
Kleb_pneu_GCA_001903095.3	ST-258	0
Kleb_pneu_GCA_001903105.1_V1	ST-258	0
Kleb_pneu_GCA_001903125.1_V1	ST-258	0
Kleb_pneu_GCA_001903135.1_V1	ST-258	0
Kleb_pneu_GCA_001903175.1_V1	ST-258	0
Kleb_pneu_GCA_001903195.1_V1	ST-258	0
Kleb_pneu_GCA_001903205.1_V1	ST-258	0
Kleb_pneu_GCA_001903215.1_V1	ST-258	0
Kleb_pneu_GCA_001903255.1_V1	ST-258	0
Kleb_pneu_GCA_001903265.1_V1	ST-258	0
Kleb_pneu_GCA_001903285.1_V1	ST-258	0
Kleb_pneu_GCA_001903295.1_V1	ST-258	0
Kleb_pneu_GCA_001903355.1_V1	ST-258	0
Kleb_pneu_GCA_001903365.1_V1	ST-258	0
Kleb_pneu_GCA_001903385.1_V1	ST-258	0
Kleb_pneu_GCA_001903415.1_V1	ST-258	0
Kleb_pneu_GCA_001903435.1_V1	ST-258	0
Kleb_pneu_GCA_001903445.1_V1	ST-258	0
Kleb_pneu_GCA_001903465.1_V1	ST-258	0
Kleb_pneu_GCA_001903495.1_V1	ST-258	0
Kleb_pneu_GCA_001903515.1_V1	ST-258	0
Kleb_pneu_GCA_001903525.1_V1	ST-258	0
Kleb_pneu_GCA_001903535.1_V1	ST-258	0
Kleb_pneu_GCA_001903555.1_V1	ST-258	0
Kleb_pneu_GCA_001903605.1_V1	ST-258	0
Kleb_pneu_GCA_001903625.1_V1	ST-258	0
Kleb_pneu_GCA_001903675.1_V1	ST-258	0
Kleb_pneu_GCA_001903735.1_V1	ST-258	0
Kleb_pneu_GCA_001903755.1_V1	ST-258	0
Kleb_pneu_GCA_001903775.1_V1	ST-258	0
Kleb_pneu_GCA_001903785.1_V1	ST-258	0
Kleb_pneu_GCA_001903795.1_V1	ST-258	0
Kleb_pneu_GCA_001903835.1_V1	ST-258	0
Kleb_pneu_GCA_001903845.1_V1	ST-258	0
Kleb_pneu_GCA_001903865.3	ST-258	0
Kleb_pneu_GCA_001903875.1_V1	ST-258	0
Kleb_pneu_GCA_001903915.1_V1	ST-258	0
Kleb_pneu_GCA_001903925.1_V1	ST-258	0
Kleb_pneu_GCA_001903935.3	ST-258	0
Kleb_pneu_GCA_001903995.1_V1	ST-258	0
Kleb_pneu_GCA_001904005.1_V1	ST-258	0
Kleb_pneu_GCA_001904045.1_V1	ST-258	0
Kleb_pneu_GCA_001904095.3	ST-258	0
Kleb_pneu_GCA_001904105.1_V1	ST-258	0
Kleb_pneu_GCA_001904115.1_V1	ST-258	0
Kleb_pneu_GCA_001904155.1_V1	ST-258	0
Kleb_pneu_GCA_001904165.1_V1	ST-258	0
Kleb_pneu_GCA_001904175.1_V1	ST-258	0
Kleb_pneu_GCA_001904205.1_V1	ST-258	0
Kleb_pneu_GCA_001904235.3	ST-258	0
Kleb_pneu_GCA_001904255.1_V1	ST-258	0
Kleb_pneu_GCA_001904295.1_V1	ST-258	0
Kleb_pneu_GCA_001904315.1_V1	ST-258	0
Kleb_pneu_GCA_001904325.1_V1	ST-258	0
Kleb_pneu_GCA_001904335.1_V1	ST-258	0
Kleb_pneu_GCA_001904375.1_V1	ST-258	0
Kleb_pneu_GCA_001904385.1_V1	ST-258	0
Kleb_pneu_GCA_001904425.1_V1	ST-258	0
Kleb_pneu_GCA_001904455.1_V1	ST-258	0
Kleb_pneu_GCA_001904485.1_V1	ST-258	0
Kleb_pneu_GCA_001904495.1_V1	ST-258	0
Kleb_pneu_GCA_001904535.1_V1	ST-258	0
Kleb_pneu_GCA_001905185.1_V1	ST-258	0
Kleb_pneu_GCA_001905195.1_V1	ST-258	0
Kleb_pneu_GCA_001905235.1_V1	ST-258	0
Kleb_pneu_GCA_001906645.1_V1	ST-258	0
Kleb_pneu_GCA_001906685.1_V1	ST-258	0
Kleb_pneu_GCA_001906705.1_V1	ST-258	0
Kleb_pneu_GCA_001906715.1_V1	ST-258	0
Kleb_pneu_GCA_001906725.1_V1	ST-258	0
Kleb_pneu_GCA_001952915.1_V1	ST-258	0
Kleb_pneu_GCA_002056385.1_V1	ST-258	0
Kleb_pneu_GCA_002056475.1_V1	ST-258	0
Kleb_pneu_GCA_002103525.1	ST-258	0
Kleb_pneu_GCA_002103555.1	ST-258	0
Kleb_pneu_GCA_002103565.1	ST-258	0
Kleb_pneu_GCA_002103645.1	ST-258	0
Kleb_pneu_GCA_002103655.1	ST-258	0
Kleb_pneu_GCA_002103675.1	ST-258	0
Kleb_pneu_GCA_002103715.1	ST-258	0
Kleb_pneu_GCA_002103725.1	ST-258	0
Kleb_pneu_GCA_002103735.1	ST-258	0
Kleb_pneu_GCA_002103745.1	ST-258	0
Kleb_pneu_GCA_002115605.1	ST-258	0
Kleb_pneu_GCA_002115625.1	ST-258	0
Kleb_pneu_GCA_002115645.1	ST-258	0
Kleb_pneu_GCA_002156725.1	ST-258	0
Kleb_pneu_GCA_002162395.1	ST-258	0
Kleb_pneu_GCA_002162405.1	ST-258	0
Kleb_pneu_GCA_002162425.1	ST-258	0
Kleb_pneu_GCA_002162475.1	ST-258	0
Kleb_pneu_GCA_002180075.1	ST-258	0
Kleb_pneu_GCA_002180155.1	ST-258	0
Kleb_pneu_GCA_002180295.1	ST-258	0
Kleb_pneu_GCA_002180485.1	ST-258	0
Kleb_pneu_GCA_002180525.1	ST-258	0
Kleb_pneu_GCA_002180535.1	ST-258	0
Kleb_pneu_GCA_002180565.1	ST-258	0
Kleb_pneu_GCA_002180595.1	ST-258	0
Kleb_pneu_GCA_002180605.1	ST-258	0
Kleb_pneu_GCA_002180695.1	ST-258	0
Kleb_pneu_GCA_002180735.1	ST-258	0
Kleb_pneu_GCA_002180765.1	ST-258	0
Kleb_pneu_GCA_002180775.1	ST-258	0
Kleb_pneu_GCA_002180805.1	ST-258	0
Kleb_pneu_GCA_002180845.1	ST-258	0
Kleb_pneu_GCA_002180855.1	ST-258	0
Kleb_pneu_GCA_002180885.1	ST-258	0
Kleb_pneu_GCA_002180895.1	ST-258	0
Kleb_pneu_GCA_002180925.1	ST-258	0
Kleb_pneu_GCA_002180935.1	ST-258	0
Kleb_pneu_GCA_002180965.1	ST-258	0
Kleb_pneu_GCA_002180975.1	ST-258	0
Kleb_pneu_GCA_002181005.1	ST-258	0
Kleb_pneu_GCA_002181015.1	ST-258	0
Kleb_pneu_GCA_002181045.1	ST-258	0
Kleb_pneu_GCA_002181055.1	ST-258	0
Kleb_pneu_GCA_002181085.1	ST-258	0
Kleb_pneu_GCA_002181095.1	ST-258	0
Kleb_pneu_GCA_002181105.1	ST-258	0
Kleb_pneu_GCA_002181145.1	ST-258	0
Kleb_pneu_GCA_002181165.1	ST-258	0
Kleb_pneu_GCA_002181175.1	ST-258	0
Kleb_pneu_GCA_002181185.1	ST-258	0
Kleb_pneu_GCA_002181245.1	ST-258	0
Kleb_pneu_GCA_002181265.1	ST-258	0
Kleb_pneu_GCA_002181275.1	ST-258	0
Kleb_pneu_GCA_002181305.1	ST-258	0
Kleb_pneu_GCA_002181325.1	ST-258	0
Kleb_pneu_GCA_002181345.1	ST-258	0
Kleb_pneu_GCA_002181355.1	ST-258	0
Kleb_pneu_GCA_002181405.1	ST-258	0
Kleb_pneu_GCA_002181415.1	ST-258	0
Kleb_pneu_GCA_002181455.1	ST-258	0
Kleb_pneu_GCA_002181485.1	ST-258	0
Kleb_pneu_GCA_002181505.1	ST-258	0
Kleb_pneu_GCA_002181525.1	ST-258	0
Kleb_pneu_GCA_002181545.1	ST-258	0
Kleb_pneu_GCA_002181555.1	ST-258	0
Kleb_pneu_GCA_002181585.1	ST-258	0
Kleb_pneu_GCA_002181595.1	ST-258	0
Kleb_pneu_GCA_002181665.1	ST-258	0
Kleb_pneu_GCA_002181675.1	ST-258	0
Kleb_pneu_GCA_002181705.1	ST-258	0
Kleb_pneu_GCA_002181715.1	ST-258	0
Kleb_pneu_GCA_002181745.1	ST-258	0
Kleb_pneu_GCA_002181755.1	ST-258	0
Kleb_pneu_GCA_002181785.1	ST-258	0
Kleb_pneu_GCA_002181795.1	ST-258	0
Kleb_pneu_GCA_002181825.1	ST-258	0
Kleb_pneu_GCA_002181835.1	ST-258	0
Kleb_pneu_GCA_002181865.1	ST-258	0
Kleb_pneu_GCA_002181965.1	ST-258	0
Kleb_pneu_GCA_002182005.1	ST-258	0
Kleb_pneu_GCA_002182055.1	ST-258	0
Kleb_pneu_GCA_002182065.1	ST-258	0
Kleb_pneu_GCA_002182125.1	ST-258	0
Kleb_pneu_GCA_002182135.1	ST-258	0
Kleb_pneu_GCA_002182155.1	ST-258	0
Kleb_pneu_GCA_002182215.1	ST-258	0
Kleb_pneu_GCA_002182285.1	ST-258	0
Kleb_pneu_GCA_002182305.1	ST-258	0
Kleb_pneu_GCA_002182325.1	ST-258	0
Kleb_pneu_GCA_002182525.1	ST-258	0
Kleb_pneu_GCA_002182535.1	ST-258	0
Kleb_pneu_GCA_002184115.1	ST-258	0
Kleb_pneu_GCA_002184225.1	ST-258	0
Kleb_pneu_GCA_002184395.1	ST-258	0
Kleb_pneu_GCA_002184415.1	ST-258	0
Kleb_pneu_GCA_002184505.1	ST-258	0
Kleb_pneu_GCA_002184515.1	ST-258	0
Kleb_pneu_GCA_002184525.1	ST-258	0
Kleb_pneu_GCA_002184705.1	ST-258	0
Kleb_pneu_GCA_002184715.1	ST-258	0
Kleb_pneu_GCA_002184755.1	ST-258	0
Kleb_pneu_GCA_002184785.1	ST-258	0
Kleb_pneu_GCA_002184795.1	ST-258	0
Kleb_pneu_GCA_002184825.1	ST-258	0
Kleb_pneu_GCA_002184835.1	ST-258	0
Kleb_pneu_GCA_002184865.1	ST-258	0
Kleb_pneu_GCA_002184875.1	ST-258	0
Kleb_pneu_GCA_002184945.1	ST-258	0
Kleb_pneu_GCA_002185025.1	ST-258	0
Kleb_pneu_GCA_002185045.1	ST-258	0
Kleb_pneu_GCA_002185055.1	ST-258	0
Kleb_pneu_GCA_002185075.1	ST-258	0
Kleb_pneu_GCA_002185105.1	ST-258	0
Kleb_pneu_GCA_002185125.1	ST-258	0
Kleb_pneu_GCA_002185135.1	ST-258	0
Kleb_pneu_GCA_002185155.1	ST-258	0
Kleb_pneu_GCA_002185185.1	ST-258	0
Kleb_pneu_GCA_002185205.1	ST-258	0
Kleb_pneu_GCA_002185215.1	ST-258	0
Kleb_pneu_GCA_002185385.1	ST-258	0
Kleb_pneu_GCA_002185415.1	ST-258	0
Kleb_pneu_GCA_002185425.1	ST-258	0
Kleb_pneu_GCA_002185465.1	ST-258	0
Kleb_pneu_GCA_002185485.1	ST-258	0
Kleb_pneu_GCA_002185495.1	ST-258	0
Kleb_pneu_GCA_002185545.1	ST-258	0
Kleb_pneu_GCA_002185555.1	ST-258	0
Kleb_pneu_GCA_002185565.1	ST-258	0
Kleb_pneu_GCA_002185625.1	ST-258	0
Kleb_pneu_GCA_002185645.1	ST-258	0
Kleb_pneu_GCA_002185655.1	ST-258	0
Kleb_pneu_GCA_002185665.1	ST-258	0
Kleb_pneu_GCA_002185705.1	ST-258	0
Kleb_pneu_GCA_002185725.1	ST-258	0
Kleb_pneu_GCA_002185735.1	ST-258	0
Kleb_pneu_GCA_002185745.1	ST-258	0
Kleb_pneu_GCA_002185755.1	ST-258	0
Kleb_pneu_GCA_002185805.1	ST-258	0
Kleb_pneu_GCA_002185815.1	ST-258	0
Kleb_pneu_GCA_002185835.1	ST-258	0
Kleb_pneu_GCA_002185905.1	ST-258	0
Kleb_pneu_GCA_002185915.1	ST-258	0
Kleb_pneu_GCA_002185925.1	ST-258	0
Kleb_pneu_GCA_002186015.1	ST-258	0
Kleb_pneu_GCA_002186045.1	ST-258	0
Kleb_pneu_GCA_002186055.1	ST-258	0
Kleb_pneu_GCA_002186085.1	ST-258	0
Kleb_pneu_GCA_002186095.1	ST-258	0
Kleb_pneu_GCA_002186125.1	ST-258	0
Kleb_pneu_GCA_002186135.1	ST-258	0
Kleb_pneu_GCA_002186165.1	ST-258	0
Kleb_pneu_GCA_002186185.1	ST-258	0
Kleb_pneu_GCA_002186215.1	ST-258	0
Kleb_pneu_GCA_002186245.1	ST-258	0
Kleb_pneu_GCA_002186265.1	ST-258	0
Kleb_pneu_GCA_002186275.1	ST-258	0
Kleb_pneu_GCA_002186325.1	ST-258	0
Kleb_pneu_GCA_002186335.1	ST-258	0
Kleb_pneu_GCA_002186365.1	ST-258	0
Kleb_pneu_GCA_002186375.1	ST-258	0
Kleb_pneu_GCA_002186405.1	ST-258	0
Kleb_pneu_GCA_002186415.1	ST-258	0
Kleb_pneu_GCA_002192335.1	ST-258	0
Kleb_pneu_GCA_002197225.1	ST-258	0
Kleb_pneu_GCA_002197505.1	ST-258	0
Kleb_pneu_GCA_002235265.1	ST-258	0
Kleb_pneu_GCA_002235295.1	ST-258	0
Kleb_pneu_GCA_002235325.1	ST-258	0
Kleb_pneu_GCA_002235355.1	ST-258	0
Kleb_pneu_GCA_002235535.1	ST-258	0
Kleb_pneu_GCA_002235635.1	ST-258	0
Kleb_pneu_GCA_002235655.1	ST-258	0
Kleb_pneu_GCA_002235735.1	ST-258	0
Kleb_pneu_GCA_002235875.1	ST-258	0
Kleb_pneu_GCA_002235915.1	ST-258	0
Kleb_pneu_GCA_002235935.1	ST-258	0
Kleb_pneu_GCA_002235975.1	ST-258	0
Kleb_pneu_GCA_002235985.1	ST-258	0
Kleb_pneu_GCA_002236015.1	ST-258	0
Kleb_pneu_GCA_002236055.1	ST-258	0
Kleb_pneu_GCA_002243445.1	ST-258	0
Kleb_pneu_GCA_002268675.1	ST-258	0
Kleb_pneu_GCA_002268775.1	ST-258	0
Kleb_pneu_GCA_002268825.1	ST-258	0
Kleb_pneu_GCA_002268865.1	ST-258	0
Kleb_pneu_GCA_002268895.1	ST-258	0
Kleb_pneu_GCA_002268915.1	ST-258	0
Kleb_pneu_GCA_002268925.1	ST-258	0
Kleb_pneu_GCA_002269895.1	ST-258	0
Kleb_pneu_GCA_002271295.1	ST-258	0
Kleb_pneu_GCA_002271345.1	ST-258	0
Kleb_pneu_GCA_900069965.1_V1	ST-258	0
Kleb_pneu_GCA_900172795.1_V1	ST-258	0
Kleb_pneu_GCA_900172845.1_V1	ST-258	0
Kleb_pneu_Kb140_GCA_000599925.1_V1	ST-258	0
Kleb_pneu_Kb677_GCA_000599905.1_V1	ST-258	0
Kleb_pneu_MGH_29_V1	ST-258	0
Kleb_pneu_MGH_31_V1	ST-258	0
Kleb_pneu_MGH_51_V1	ST-258	0
Kleb_pneu_MGH_59_V1	ST-258	0
Kleb_pneu_MGH_67_V1	ST-258	0
Kleb_pneu_MGH_71_V1	ST-258	0
Kleb_pneu_MGH_73_V1	ST-258	0
Kleb_pneu_MGH_79_V1	ST-258	0
Kleb_pneu_MGH125_V1	ST-258	0
Kleb_pneu_MGH140_V1	ST-258	0
Kleb_pneu_MGH153_V1	ST-258	0
Kleb_pneu_MGH181_V1	ST-258	0
Kleb_pneu_MGH91_V1	ST-258	0
Kleb_pneu_MGH95_V1	ST-258	0
Kleb_pneu_MRSN_6902_GCA_000982045.1_V1	ST-258	0
Kleb_pneu_subsp._pneumoniae_GCA_000775375.1_V1	ST-258	0
Kleb_pneu_subsp._pneumoniae_GCA_000775395.1_V1	ST-258	0
Kleb_pneu_subsp._pneumoniae_GCA_000784985.1_V1	ST-258	0
Kleb_pneu_subsp._pneumoniae_GCA_000788015.1_V1	ST-258	0
Kleb_pneu_subsp._pneumoniae_GCA_001008725.1_V1	ST-258	0
Kleb_pneu_subsp._pneumoniae_GCA_001708165.1_V1	ST-258	0
Kleb_pneu_subsp._pneumoniae_GCA_002086075.1_V1	ST-258	0
Kleb_pneu_subsp._pneumoniae_GCA_002249975.1	ST-258	0
Kleb_pneu_subsp._pneumoniae_KKBO-1_GCA_000495875.1_V1	ST-258	0
Kleb_pneu_subsp._pneumoniae_KKBO-4_GCA_000495895.2_V1	ST-258	0
Kleb_pneu_subsp._pneumoniae_KPNIH1_GCA_000281535.2_V1	ST-258	0
Kleb_pneu_subsp._pneumoniae_KPNIH10_GCA_000281435.2_V1	ST-258	0
Kleb_pneu_subsp._pneumoniae_KPNIH11_GCA_000281575.1_V1	ST-258	0
Kleb_pneu_subsp._pneumoniae_KPNIH12_GCA_000281335.1_V1	ST-258	0
Kleb_pneu_subsp._pneumoniae_KPNIH14_GCA_000281455.1_V1	ST-258	0
Kleb_pneu_subsp._pneumoniae_KPNIH16_GCA_000281595.1_V1	ST-258	0
Kleb_pneu_subsp._pneumoniae_KPNIH17_GCA_000281355.1_V1	ST-258	0
Kleb_pneu_subsp._pneumoniae_KPNIH18_GCA_000281475.1_V1	ST-258	0
Kleb_pneu_subsp._pneumoniae_KPNIH19_GCA_000281615.1_V1	ST-258	0
Kleb_pneu_subsp._pneumoniae_KPNIH2_GCA_000281255.1_V1	ST-258	0
Kleb_pneu_subsp._pneumoniae_KPNIH20_GCA_000281375.1_V1	ST-258	0
Kleb_pneu_subsp._pneumoniae_KPNIH21_GCA_000281495.1_V1	ST-258	0
Kleb_pneu_subsp._pneumoniae_KPNIH22_GCA_000281515.1_V1	ST-258	0
Kleb_pneu_subsp._pneumoniae_KPNIH24_GCA_000714675.1_V1	ST-258	0
Kleb_pneu_subsp._pneumoniae_KPNIH4_GCA_000281395.1_V1	ST-258	0
Kleb_pneu_subsp._pneumoniae_KPNIH5_GCA_000281275.1_V1	ST-258	0
Kleb_pneu_subsp._pneumoniae_KPNIH6_GCA_000281295.1_V1	ST-258	0
Kleb_pneu_subsp._pneumoniae_KPNIH7_GCA_000281415.1_V1	ST-258	0
Kleb_pneu_subsp._pneumoniae_KPNIH8_GCA_000281555.1_V1	ST-258	0
Kleb_pneu_subsp._pneumoniae_KPNIH9_GCA_000281315.1_V1	ST-258	0
Kleb_pneu_subsp._pneumoniae_KPR0928_GCA_000717515.1_V1	ST-258	0
Kleb_pneu_subsp._pneumoniae_MP14_GCA_000439165.1_V1	ST-258	0
Kleb_pneu_UCI_1_V1	ST-258	0
Kleb_pneu_UCI_13_V1	ST-258	0
Kleb_pneu_UCI_19_V1	ST-258	0
Kleb_pneu_UCI_21_V1	ST-258	0
Kleb_pneu_UCI_22_V1	ST-258	0
Kleb_pneu_UCI_33_V1	ST-258	0
Kleb_pneu_UCI_37_V1	ST-258	0
Kleb_pneu_UCI_38_V1	ST-258	0
Kleb_pneu_UCI_41_V1	ST-258	0
Kleb_pneu_UCI_43_V1	ST-258	0
Kleb_pneu_UCI_44_V1	ST-258	0
Kleb_pneu_UCI_55_V1	ST-258	0
Kleb_pneu_UCI_59_V1	ST-258	0
Kleb_pneu_UCI_61_V1	ST-258	0
Kleb_pneu_UCI_63_V1	ST-258	0
Kleb_pneu_UCI_67_V1	ST-258	0
Kleb_pneu_UCI105_V1	ST-258	0
Kleb_pneu_UCI109_V1	ST-258	0
Kleb_pneu_UCI113_V1	ST-258	0
Kleb_pneu_UCI115_V1	ST-258	0
Kleb_pneu_UCI117_V1	ST-258	0
Kleb_pneu_UCI163	ST-258	0
Kleb_pneu_UCI171	ST-258	0
Kleb_pneu_UCI177	ST-258	0
Kleb_pneu_UCI185	ST-258	0
Kleb_pneu_UCI195	ST-258	0
Kleb_Pneu_UCI69_V1	ST-258	0
Kleb_Pneu_UCI75_V1	ST-258	0
Kleb_Pneu_UCI81_V1	ST-258	0
Kleb_Pneu_UCI91_V1	ST-258	0
Kleb_Pneu_UCI93_V1	ST-258	0
Kleb_Pneu_UCI95_V1	ST-258	0
Kleb_pneu_UCICRE-133	ST-258	0
Kleb_pneu_UCICRE-137	ST-258	0
Kleb_pneu_UCICRE-139	ST-258	0
Kleb_pneu_UCICRE-145	ST-258	0
Kleb_pneu_UHKPC_52_GCA_000408985.1_V1	ST-258	0
Kleb_pneu_UHKPC_52_GCA_000709225.1_V1	ST-258	0
Kleb_pneu_UHKPC02_GCA_000417145.1_V1	ST-258	0
Kleb_pneu_UHKPC05_GCA_000408965.1_V1	ST-258	0
Kleb_pneu_UHKPC05_GCA_000709245.1_V1	ST-258	0
Kleb_pneu_UHKPC06_GCA_000417185.1_V1	ST-258	0
Kleb_pneu_UHKPC07_GCA_000417265.2_V1	ST-258	0
Kleb_pneu_UHKPC09_GCA_000406425.1_V1	ST-258	0
Kleb_pneu_UHKPC17_GCA_000417545.1_V1	ST-258	0
Kleb_pneu_UHKPC24_GCA_000406605.1_V1	ST-258	0
Kleb_pneu_UHKPC26_GCA_000406665.1_V1	ST-258	0
Kleb_pneu_UHKPC27_GCA_000406465.1_V1	ST-258	0
Kleb_pneu_UHKPC28_GCA_000417105.1_V1	ST-258	0
Kleb_pneu_UHKPC29_GCA_000409045.1_V1	ST-258	0
Kleb_pneu_UHKPC31_GCA_000417165.1_V1	ST-258	0
Kleb_pneu_UHKPC33_GCA_000417085.2_V1	ST-258	0
Kleb_pneu_UHKPC45_GCA_000409005.1_V1	ST-258	0
Kleb_pneu_UHKPC45_GCA_000709205.1_V1	ST-258	0
Kleb_pneu_UHKPC47_GCA_000417125.1_V1	ST-258	0
Kleb_pneu_UHKPC48_GCA_000409085.1_V1	ST-258	0
Kleb_pneu_UHKPC59_GCA_000417045.1_V1	ST-258	0
Kleb_pneu_UHKPC61_GCA_000417065.1_V1	ST-258	0
Kleb_pneu_UHKPC67_GCA_000417445.1_V1	ST-258	0
Kleb_pneu_UHKPC77_GCA_000417325.1_V1	ST-258	0
Kleb_pneu_UHKPC96_GCA_000417345.1_V1	ST-258	0
Kleb_pneu_VA360_GCA_000316245.2_V1	ST-258	0
Kleb_pneu_VAKPC254_GCA_000406825.1_V1	ST-258	0
Kleb_pneu_VAKPC270_GCA_000406585.1_V1	ST-258	0
Kleb_pneu_VAKPC278_GCA_000409025.1_V1	ST-258	0
Kleb_pneu_VAKPC278_GCA_000709185.1_V1	ST-258	0
Kleb_pneu_GCA_900085955.1_V1	ST-26	1	Kleb_pneu_GCA_900085955.1_V1_PatKP979_000769T0	Kleb_pneu_GCA_001597035.1_V1.annotation.cds_PatKP451_000147T0
Kleb_pneu_GCA_900172665.1_V1	ST-26	1	Kleb_pneu_GCA_900172665.1_V1_PatKP1190_004727T0	Kleb_pneu_GCA_900172665.1_V1.annotation.cds_PatKP1190_004733T0
Kleb_pneu_GCA_000766125.1_V1	ST-268	0
Kleb_pneu_GCA_000822245.1_V1	ST-268	0
Kleb_pneu_GCA_900172575.1_V1	ST-268	0
Kleb_pneu_GCA_900172695.1_V1	ST-268	0
Kleb_pneu_GCA_900172725.1_V1	ST-268	0
Kleb_pneu_GCA_900172755.1_V1	ST-268	0
Kleb_pneu_GCA_900172765.1_V1	ST-268	0
Kleb_pneu_GCA_900172895.1_V1	ST-268	0
Kleb_pneu_GCA_900172935.1_V1	ST-268	0
Kleb_pneu_GCA_900172955.1_V1	ST-268	0
Kleb_pneu_GCA_900173035.1_V1	ST-268	0
Kleb_pneu_GCA_900173055.1_V1	ST-268	0
Kleb_pneu_GCA_900173085.1_V1	ST-268	0
Kleb_pneu_GCA_900173095.1_V1	ST-268	0
Kleb_pneu_GCA_900173165.1_V1	ST-268	0
Kleb_pneu_GCA_900173185.1_V1	ST-268	0
Kleb_pneu_GCA_900173665.1_V1	ST-268	0
Kleb_pneu_GCA_900173695.1_V1	ST-268	0
Kleb_pneu_GCA_900174215.1_V1	ST-268	0
Kleb_pneu_GCA_900174365.1_V1	ST-268	0
Kleb_pneu_GCA_900174415.1_V1	ST-268	0
Kleb_pneu_MGH193	ST-268	0
Kleb_pneu_GCA_002264845.1	ST-268	1
Kleb_pneu_GCA_900085035.1_V1	ST-27	0
Kleb_pneu_GCA_900085045.1_V1	ST-27	0
Kleb_pneu_GCA_900086365.1_V1	ST-27	0
Kleb_pneu_GCA_001663435.1_V1	ST-273	1	Kleb_pneu_GCA_900084735.1_V1_PatKP859_001299T0	Kleb_pneu_GCA_000956385.1_V1.annotation.cds_PatKP252_003150T0
Kleb_pneu_GCA_002108235.1	ST-273	1	Kleb_pneu_GCA_900084735.1_V1_PatKP859_001299T0	Kleb_pneu_GCA_000956385.1_V1.annotation.cds_PatKP252_003150T0
Kleb_pneu_GCA_002108245.1	ST-273	1	Kleb_pneu_GCA_900084735.1_V1_PatKP859_001299T0	Kleb_pneu_GCA_000956385.1_V1.annotation.cds_PatKP252_003150T0
Kleb_pneu_GCA_002108285.1	ST-273	1	Kleb_pneu_GCA_900084735.1_V1_PatKP859_001299T0	Kleb_pneu_GCA_000956385.1_V1.annotation.cds_PatKP252_003150T0
Kleb_pneu_GCA_002108405.1	ST-273	1	Kleb_pneu_GCA_900084735.1_V1_PatKP859_001299T0	Kleb_pneu_GCA_000956385.1_V1.annotation.cds_PatKP252_003150T0
Kleb_pneu_GCA_002108415.1	ST-273	1	Kleb_pneu_GCA_900084735.1_V1_PatKP859_001299T0	Kleb_pneu_GCA_000956385.1_V1.annotation.cds_PatKP252_003150T0
Kleb_pneu_MGH206	ST-277	1	Kleb_pneu_GCA_900171845.1_V1_PatKP1131_001701T0	Kleb_pneu_GCA_900171845.1_V1.annotation.cds_PatKP1131_001707T0
Kleb_Pneu_UCI94_V1	ST-277	1	Kleb_pneu_GCA_900171845.1_V1_PatKP1131_001701T0	Kleb_pneu_GCA_900171845.1_V1.annotation.cds_PatKP1131_001707T0
Kleb_pneu_GCA_900171705.1_V1	ST-277	2	Kleb_pneu_GCA_900171845.1_V1_PatKP1131_001701T0	Kleb_pneu_GCA_900171845.1_V1.annotation.cds_PatKP1131_001707T0
Kleb_pneu_GCA_900171835.1_V1	ST-277	2	Kleb_pneu_GCA_900171845.1_V1_PatKP1131_001701T0	Kleb_pneu_GCA_900171845.1_V1.annotation.cds_PatKP1131_001707T0
Kleb_pneu_GCA_900171915.1_V1	ST-277	2	Kleb_pneu_GCA_900171845.1_V1_PatKP1131_001701T0	Kleb_pneu_GCA_900171845.1_V1.annotation.cds_PatKP1131_001707T0
Kleb_pneu_GCA_001456055.3_V1	ST-278	0
Kleb_pneu_GCA_001456095.3_V1	ST-278	0
Kleb_pneu_GCA_001884315.1_V1	ST-278	0
Kleb_pneu_GCA_001884325.1_V1	ST-278	0
Kleb_pneu_GCA_001884335.1_V1	ST-278	0
Kleb_pneu_GCA_001884385.1_V1	ST-278	0
Kleb_pneu_GCA_001884415.1_V1	ST-278	0
Kleb_pneu_GCA_001884425.1_V1	ST-278	0
Kleb_pneu_GCA_001884465.1_V1	ST-278	0
Kleb_pneu_GCA_001884485.1_V1	ST-278	0
Kleb_pneu_subsp._pneumoniae_GCA_900181595.1	ST-278	0
Kleb_pneu_subsp._pneumoniae_GCA_900181615.1	ST-278	0
Kleb_pneu_subsp._pneumoniae_GCA_900181815.1	ST-278	0
Kleb_pneu_UCICRE-123	ST-280	0
Kleb_pneu_GCA_900086445.1_V1	ST-280	0	Kleb_pneu_GCA_900172985.1_V1_PatKP1222_004072T0
Kleb_pneu_GCA_000785625.1_V1	ST-29	0
Kleb_pneu_GCA_000822945.1_V1	ST-29	0
Kleb_pneu_GCA_001546515.1_V1	ST-29	0
Kleb_pneu_GCA_001549995.1_V1	ST-29	0
Kleb_pneu_GCA_001630805.1_V1	ST-29	0
Kleb_pneu_GCA_002119085.1	ST-29	0
Kleb_pneu_GCA_002752775.1	ST-29	0
Kleb_pneu_GCA_002752815.1	ST-29	0
Kleb_pneu_GCA_900084725.1_V1	ST-29	0
Kleb_pneu_GCA_900085545.1_V1	ST-29	0
Kleb_pneu_GCA_900085565.1_V1	ST-29	0
Kleb_pneu_GCA_900085935.1_V1	ST-29	0
Kleb_pneu_GCA_900086335.1_V1	ST-29	0
Kleb_pneu_GCA_900092825.1_V1	ST-29	0
Kleb_pneu_GCA_900173625.1_V1	ST-29	0
Kleb_pneu_GCA_900173635.1_V1	ST-29	0
Kleb_pneu_GCA_900173655.1_V1	ST-29	0
Kleb_pneu_GCA_900173675.1_V1	ST-29	0
Kleb_pneu_GCA_900173685.1_V1	ST-29	0
Kleb_pneu_KP-1_GCA_000465975.2_V1	ST-29	0
Kleb_pneu_MGH_66_V1	ST-29	0
Kleb_pneu_subsp._pneumoniae_GCA_900180815.1	ST-29	0
Kleb_pneu_subsp._pneumoniae_GCA_900181875.1	ST-29	0
Kleb_pneu_subsp._pneumoniae_GCA_900181895.1	ST-29	0
Kleb_pneu_GCA_001701705.1_V1	ST-290	0
Kleb_pneu_GCA_900085315.1_V1	ST-292	0
Kleb_pneu_subsp._pneumoniae_GCA_900181705.1	ST-292	0
Kleb_pneu_GCA_002180495.1	ST-299	0
Kleb_pneu_GCA_002181875.1	ST-299	0
Kleb_pneu_GCA_002182145.1	ST-299	0
Kleb_pneu_UCI202	ST-299	0
Kleb_pneu_GCA_000742135.1_V1	ST-3	0
Kleb_pneu_GCA_000788025.1_V1	ST-3	0
Kleb_pneu_subsp._pneumoniae_DSM_30104_GCA_000281755.1_V1	ST-3	0
Kleb_pneu_subsp._pneumoniae_NBRC_14940_GCA_001590945.1_V1	ST-3	0
Kleb_pneu_GCA_001693715.1_V1	ST-301	2	Kleb_pneu_GCA_000822105.1_V1_PatKP199_004801T0	Kleb_pneu_GCA_000822105.1_V1.annotation.cds_PatKP199_004795T0
Kleb_pneu_GCA_002269805.1	ST-305	0
Kleb_pneu_GCA_000821465.1_V1	ST-307	0
Kleb_pneu_GCA_000821605.1_V1	ST-307	0
Kleb_pneu_GCA_000822005.1_V1	ST-307	0
Kleb_pneu_GCA_000823125.1_V1	ST-307	0
Kleb_pneu_GCA_001597075.1_V1	ST-307	0
Kleb_pneu_GCA_001720845.1_V1	ST-307	0
Kleb_pneu_GCA_001902865.1_V1	ST-307	0
Kleb_pneu_GCA_001903615.1_V1	ST-307	0
Kleb_pneu_GCA_001903695.1_V1	ST-307	0
Kleb_pneu_GCA_002104395.1	ST-307	0
Kleb_pneu_GCA_002148835.1	ST-307	0
Kleb_pneu_GCA_002166915.1	ST-307	0
Kleb_pneu_GCA_002166955.1	ST-307	0
Kleb_pneu_GCA_002166965.1	ST-307	0
Kleb_pneu_GCA_002167025.1	ST-307	0
Kleb_pneu_GCA_002167035.1	ST-307	0
Kleb_pneu_GCA_002167065.1	ST-307	0
Kleb_pneu_GCA_002167135.1	ST-307	0
Kleb_pneu_GCA_002167145.1	ST-307	0
Kleb_pneu_GCA_002184915.1	ST-307	0
Kleb_pneu_GCA_002185575.1	ST-307	0
Kleb_pneu_GCA_002186005.1	ST-307	0
Kleb_pneu_GCA_002186255.1	ST-307	0
Kleb_pneu_GCA_002187305.1	ST-307	0
Kleb_pneu_GCA_002188055.1	ST-307	0
Kleb_pneu_GCA_002235035.1	ST-307	0
Kleb_pneu_GCA_002235175.1	ST-307	0
Kleb_pneu_GCA_002235215.1	ST-307	0
Kleb_pneu_GCA_002283495.1	ST-307	0
Kleb_pneu_GCA_900085725.1_V1	ST-307	0
Kleb_pneu_GCA_900092855.1_V1	ST-307	0
Kleb_pneu_GCA_900092885.1_V1	ST-307	0
Kleb_pneu_GCA_900093105.1_V1	ST-307	0
Kleb_pneu_GCA_900093315.1_V1	ST-307	0
Kleb_pneu_GCA_900172545.1_V1	ST-307	0
Kleb_pneu_GCA_900172585.1_V1	ST-307	0
Kleb_pneu_GCA_900172615.1_V1	ST-307	0
Kleb_pneu_GCA_900172645.1_V1	ST-307	0
Kleb_pneu_GCA_900172655.1_V1	ST-307	0
Kleb_pneu_GCA_900172685.1_V1	ST-307	0
Kleb_pneu_GCA_900172705.1_V1	ST-307	0
Kleb_pneu_GCA_900172735.1_V1	ST-307	0
Kleb_pneu_GCA_900172745.1_V1	ST-307	0
Kleb_pneu_GCA_900172775.1_V1	ST-307	0
Kleb_pneu_GCA_900172785.1_V1	ST-307	0
Kleb_pneu_GCA_900172815.1_V1	ST-307	0
Kleb_pneu_GCA_900172875.1_V1	ST-307	0
Kleb_pneu_GCA_900172885.1_V1	ST-307	0
Kleb_pneu_GCA_900172905.1_V1	ST-307	0
Kleb_pneu_GCA_900172925.1_V1	ST-307	0
Kleb_pneu_GCA_900172975.1_V1	ST-307	0
Kleb_pneu_GCA_900173075.1_V1	ST-307	0
Kleb_pneu_GCA_900173105.1_V1	ST-307	0
Kleb_pneu_GCA_900173125.1_V1	ST-307	0
Kleb_pneu_GCA_900173135.1_V1	ST-307	0
Kleb_pneu_GCA_900173375.1_V1	ST-307	0
Kleb_pneu_GCA_900173415.1_V1	ST-307	0
Kleb_pneu_GCA_900173945.1_V1	ST-307	0
Kleb_pneu_GCA_900173955.1_V1	ST-307	0
Kleb_pneu_GCA_900173965.1_V1	ST-307	0
Kleb_pneu_GCA_900205365.1	ST-307	0
Kleb_pneu_GCA_900205375.1	ST-307	0
Kleb_pneu_GCA_900205395.1	ST-307	0
Kleb_pneu_MGH_43_V1	ST-307	0
Kleb_pneu_MGH205	ST-307	0
Kleb_pneu_subsp._pneumoniae_GCA_001566595.1_V1	ST-307	0
Kleb_pneu_UCI199	ST-307	0
Kleb_pneu_UCI201	ST-307	0
Kleb_pneu_UCICRE-125	ST-307	0
Kleb_pneu_GCA_002239875.1	ST-307	1
Kleb_pneu_MGH186_V1	ST-309	0
Kleb_pneu_MGH83	ST-309	0
Kleb_pneu_GCA_900086205.1_V1	ST-317	0
Kleb_pneu_GCA_000822265.1_V1	ST-321	1	Kleb_pneu_GCA_900084735.1_V1_PatKP859_001299T0	Kleb_pneu_GCA_000822265.1_V1.annotation.cds_PatKP207_001554T0
Kleb_pneu_GCA_001701725.1_V1	ST-322	1	Kleb_pneu_GCA_900084735.1_V1_PatKP859_001299T0	Kleb_pneu_GCA_001701725.1_V1.annotation.cds_PatKP525_002733T0
Kleb_pneu_GCA_900093445.1_V1	ST-322	1	Kleb_pneu_GCA_900084735.1_V1_PatKP859_001299T0	Kleb_pneu_GCA_900093445.1_V1.annotation.cds_PatKP1114_001216T0
Kleb_pneu_GCA_900172625.1_V1	ST-322	1	Kleb_pneu_GCA_900084735.1_V1_PatKP859_001299T0	Kleb_pneu_GCA_900093445.1_V1.annotation.cds_PatKP1114_001216T0
Kleb_Pneu_UCI76_V1	ST-322	1	Kleb_pneu_GCA_900084735.1_V1_PatKP859_001299T0	Kleb_pneu_GCA_900093445.1_V1.annotation.cds_PatKP1114_001216T0
Kleb_pneu_GCA_000805735.1_V1	ST-323	0
Kleb_pneu_GCA_000821965.1_V1	ST-323	0
Kleb_pneu_GCA_000822145.1_V1	ST-323	0
Kleb_pneu_GCA_001064955.1_V1	ST-323	0
Kleb_pneu_GCA_002260905.1	ST-323	0
Kleb_pneu_GCA_002417085.1	ST-323	0
Kleb_pneu_GCA_002752905.1	ST-323	0
Kleb_pneu_GCA_002753015.1	ST-323	0
Kleb_pneu_GCA_002753035.1	ST-323	0
Kleb_pneu_GCA_002754835.1	ST-323	0
Kleb_pneu_GCA_900085595.1_V1	ST-323	0
Kleb_pneu_GCA_900092805.1_V1	ST-323	0
Kleb_pneu_GCA_900093265.1_V1	ST-323	0
Kleb_pneu_subsp._pneumoniae_GCA_001316845.2_V1	ST-323	0
Kleb_pneu_GCA_001441295.1_V1	ST-327	1	Kleb_pneu_GCA_002187545.1_PatKP1745_004694T0
Kleb_pneu_GCA_001875135.1_V1	ST-327	1	Kleb_pneu_GCA_002187545.1_PatKP1745_004694T0
Kleb_pneu_GCA_002182235.1	ST-327	1	Kleb_pneu_GCA_002187545.1_PatKP1745_004694T0
Kleb_pneu_GCA_900173115.1_V1	ST-327	1	Kleb_pneu_GCA_002187545.1_PatKP1745_004694T0	Kleb_pneu_GCA_002187545.1.annotation.cds_PatKP1745_004700T0
Kleb_pneu_GCA_001463215.1_V1	ST-336	0
Kleb_pneu_GCA_900084055.1_V1	ST-336	0
Kleb_pneu_GCA_900084225.1_V1	ST-336	0
Kleb_pneu_GCA_900084315.1_V1	ST-336	0
Kleb_pneu_GCA_900085365.1_V1	ST-336	0
Kleb_pneu_GCA_900085405.1_V1	ST-336	0
Kleb_pneu_GCA_900085425.1_V1	ST-336	0
Kleb_pneu_GCA_900085675.1_V1	ST-336	0
Kleb_pneu_GCA_900086275.1_V1	ST-336	0
Kleb_pneu_GCA_900086535.1_V1	ST-336	0
Kleb_pneu_GCA_900092935.1_V1	ST-336	0
Kleb_pneu_GCA_900092975.1_V1	ST-336	0
Kleb_pneu_GCA_900093005.1_V1	ST-336	0
Kleb_pneu_GCA_900093125.1_V1	ST-336	0
Kleb_pneu_LAU-KP1_GCA_000498775.2_V1	ST-336	0
Kleb_pneu_subsp._pneumoniae_GCA_900180995.1	ST-336	0
Kleb_pneu_subsp._pneumoniae_GCA_900181015.1	ST-336	0
Kleb_pneu_subsp._pneumoniae_GCA_900181075.1	ST-336	0
Kleb_pneu_subsp._pneumoniae_GCA_900181175.1	ST-336	0
Kleb_pneu_subsp._pneumoniae_GCA_900181195.1	ST-336	0
Kleb_pneu_subsp._pneumoniae_GCA_900181215.1	ST-336	0
Kleb_pneu_subsp._pneumoniae_GCA_900181515.1	ST-336	0
Kleb_pneu_subsp._pneumoniae_GCA_900181535.1	ST-336	0
Kleb_pneu_subsp._pneumoniae_GCA_900181555.1	ST-336	0
Kleb_pneu_subsp._pneumoniae_GCA_900181625.1	ST-336	0
Kleb_pneu_subsp._pneumoniae_GCA_900182065.1	ST-336	0
Kleb_pneu_GCA_001704235.1_V1	ST-34	0
Kleb_pneu_GCA_001874875.1_V1	ST-34	0
Kleb_pneu_GCA_002187665.1	ST-34	1	Kleb_pneu_GCA_002187665.1_PatKP1989_001851T0	Kleb_pneu_GCA_900085895.1_V1.annotation.cds_PatKP973_000333T0
Kleb_pneu_BIDMC_40_V1	ST-34	1	Kleb_pneu_GCA_900084735.1_V1_PatKP859_001299T0	Kleb_pneu_11227-1_GCA_000699345.1_V1.annotation.cds_PatKP116_001230T0
Kleb_pneu_GCA_900085795.1_V1	ST-34	1	Kleb_pneu_GCA_900084735.1_V1_PatKP859_001299T0	Kleb_pneu_GCA_900085895.1_V1.annotation.cds_PatKP973_000333T0
Kleb_pneu_GCA_900085895.1_V1	ST-34	1	Kleb_pneu_GCA_900084735.1_V1_PatKP859_001299T0	Kleb_pneu_GCA_900085895.1_V1.annotation.cds_PatKP973_000333T0
Kleb_pneu_subsp._pneumoniae_KPNIH27_GCA_000695935.1_V1	ST-34	1	Kleb_pneu_GCA_900084735.1_V1_PatKP859_001299T0	Kleb_pneu_GCA_900085895.1_V1.annotation.cds_PatKP973_000333T0
Kleb_pneu_UCI_62_V1	ST-34	1	Kleb_pneu_GCA_900084735.1_V1_PatKP859_001299T0	Kleb_pneu_GCA_900085895.1_V1.annotation.cds_PatKP973_000333T0
Kleb_pneu_GCA_001463105.1_V1	ST-340	0
Kleb_pneu_GCA_001718115.1_V1	ST-340	0
Kleb_pneu_GCA_001718175.1_V1	ST-340	0
Kleb_pneu_GCA_001902535.1_V1	ST-340	0
Kleb_pneu_GCA_001908715.1_V1	ST-340	0
Kleb_pneu_GCA_001952895.1_V1	ST-340	0
Kleb_pneu_GCA_002154825.1	ST-340	0
Kleb_pneu_GCA_002205055.1	ST-340	0
Kleb_pneu_GCA_002289105.1	ST-340	0
Kleb_pneu_GCA_002300755.1	ST-340	0
Kleb_pneu_GCA_002304205.1	ST-340	0
Kleb_pneu_GCA_002386225.1	ST-340	0
Kleb_pneu_GCA_002587885.1	ST-340	0
Kleb_pneu_GCA_002636095.1	ST-340	0
Kleb_pneu_GCA_002741685.1	ST-340	0
Kleb_pneu_GCA_002752975.1	ST-340	0
Kleb_pneu_GCA_002753055.1	ST-340	0
Kleb_pneu_GCA_002753075.1	ST-340	0
Kleb_pneu_GCA_002753165.1	ST-340	0
Kleb_pneu_GCA_002753405.1	ST-340	0
Kleb_pneu_GCA_002753555.1	ST-340	0
Kleb_pneu_GCA_002753605.1	ST-340	0
Kleb_pneu_GCA_900084175.1_V1	ST-340	0
Kleb_pneu_GCA_900084575.1_V1	ST-340	0
Kleb_pneu_GCA_900085285.1_V1	ST-340	0
Kleb_pneu_GCA_900085535.1_V1	ST-340	0
Kleb_pneu_GCA_900085855.1_V1	ST-340	0
Kleb_pneu_GCA_900085905.1_V1	ST-340	0
Kleb_pneu_GCA_900086115.1_V1	ST-340	0
Kleb_pneu_GCA_900091635.1_V1	ST-340	0
Kleb_pneu_GCA_900091645.1_V1	ST-340	0
Kleb_pneu_GCA_900091665.1_V1	ST-340	0
Kleb_pneu_GCA_900172025.1_V1	ST-346	0
Kleb_pneu_GCA_900172065.1_V1	ST-346	0
Kleb_pneu_GCA_000821765.1_V1	ST-35	1	Kleb_pneu_GCA_900093295.1_V1_PatKP1099_003481T0	Kleb_pneu_GCA_900093295.1_V1.annotation.cds_PatKP1099_003487T0
Kleb_pneu_GCA_000821785.1_V1	ST-35	2	Kleb_pneu_GCA_900093295.1_V1_PatKP1099_003481T0	Kleb_pneu_GCA_000821785.1_V1.annotation.cds_PatKP184_001509T0
Kleb_pneu_GCA_001482645.1_V1	ST-35	2	Kleb_pneu_GCA_900093295.1_V1_PatKP1099_003481T0	Kleb_pneu_GCA_001482645.1_V1.annotation.cds_PatKP389_004196T0
Kleb_pneu_GCA_002181385.1	ST-35	2	Kleb_pneu_GCA_900093295.1_V1_PatKP1099_003481T0	Kleb_pneu_GCA_002181385.1.annotation.cds_PatKP1788_002137T0
Kleb_pneu_GCA_900086315.1_V1	ST-35	2	Kleb_pneu_GCA_900093295.1_V1_PatKP1099_003481T0	Kleb_pneu_GCA_900086315.1_V1.annotation.cds_PatKP1015_000304T0
Kleb_pneu_GCA_001950635.1_V1	ST-35	2	Kleb_pneu_GCA_900093295.1_V1_PatKP1099_003481T0	Kleb_pneu_GCA_900093295.1_V1.annotation.cds_PatKP1099_003487T0
Kleb_pneu_GCA_002246075.1	ST-35	2	Kleb_pneu_GCA_900093295.1_V1_PatKP1099_003481T0	Kleb_pneu_GCA_900093295.1_V1.annotation.cds_PatKP1099_003487T0
Kleb_pneu_GCA_900084835.1_V1	ST-35	2	Kleb_pneu_GCA_900093295.1_V1_PatKP1099_003481T0	Kleb_pneu_GCA_900093295.1_V1.annotation.cds_PatKP1099_003487T0
Kleb_pneu_GCA_900085475.1_V1	ST-35	2	Kleb_pneu_GCA_900093295.1_V1_PatKP1099_003481T0	Kleb_pneu_GCA_900093295.1_V1.annotation.cds_PatKP1099_003487T0
Kleb_pneu_GCA_900093085.1_V1	ST-35	2	Kleb_pneu_GCA_900093295.1_V1_PatKP1099_003481T0	Kleb_pneu_GCA_900093295.1_V1.annotation.cds_PatKP1099_003487T0
Kleb_pneu_GCA_900093135.1_V1	ST-35	2	Kleb_pneu_GCA_900093295.1_V1_PatKP1099_003481T0	Kleb_pneu_GCA_900093295.1_V1.annotation.cds_PatKP1099_003487T0
Kleb_pneu_GCA_900093175.1_V1	ST-35	2	Kleb_pneu_GCA_900093295.1_V1_PatKP1099_003481T0	Kleb_pneu_GCA_900093295.1_V1.annotation.cds_PatKP1099_003487T0
Kleb_pneu_GCA_900093255.1_V1	ST-35	2	Kleb_pneu_GCA_900093295.1_V1_PatKP1099_003481T0	Kleb_pneu_GCA_900093295.1_V1.annotation.cds_PatKP1099_003487T0
Kleb_pneu_GCA_900093295.1_V1	ST-35	2	Kleb_pneu_GCA_900093295.1_V1_PatKP1099_003481T0	Kleb_pneu_GCA_900093295.1_V1.annotation.cds_PatKP1099_003487T0
Kleb_pneu_GCA_900093815.1_V1	ST-35	2	Kleb_pneu_GCA_900093295.1_V1_PatKP1099_003481T0	Kleb_pneu_GCA_900093295.1_V1.annotation.cds_PatKP1099_003487T0
Kleb_pneu_GCA_900174435.1_V1	ST-35	2	Kleb_pneu_GCA_900093295.1_V1_PatKP1099_003481T0	Kleb_pneu_GCA_900093295.1_V1.annotation.cds_PatKP1099_003487T0
Kleb_pneu_GCA_900177035.1	ST-35	2	Kleb_pneu_GCA_900093295.1_V1_PatKP1099_003481T0	Kleb_pneu_GCA_900093295.1_V1.annotation.cds_PatKP1099_003487T0
Kleb_pneu_MGH_64_V1	ST-35	2	Kleb_pneu_GCA_900093295.1_V1_PatKP1099_003481T0	Kleb_pneu_GCA_900093295.1_V1.annotation.cds_PatKP1099_003487T0
Kleb_pneu_GCA_000822725.1_V1	ST-35	4	Kleb_pneu_GCA_900093295.1_V1_PatKP1099_003481T0	Kleb_pneu_GCA_900093295.1_V1.annotation.cds_PatKP1099_003487T0
Kleb_pneu_GCA_000822985.1_V1	ST-35	4	Kleb_pneu_GCA_900093295.1_V1_PatKP1099_003481T0	Kleb_pneu_GCA_900093295.1_V1.annotation.cds_PatKP1099_003487T0
Kleb_pneu_GCA_900085605.1_V1	ST-353	0
Kleb_pneu_GCA_001534855.1_V1	ST-359	0
Kleb_pneu_GCA_900085205.1_V1	ST-359	0
Kleb_pneu_BIDMC_51_V1	ST-36	0
Kleb_pneu_GCA_002257935.1	ST-36	0
Kleb_pneu_GCA_002588365.1	ST-36	0
Kleb_pneu_subsp._pneumoniae_GCA_002248845.1	ST-36	0
Kleb_pneu_GCA_001701795.1_V1	ST-36	1
Kleb_pneu_BIDMC_18D_V1	ST-37	0
Kleb_pneu_BIDMC_21_V1	ST-37	0
Kleb_pneu_BIDMC_41_V1	ST-37	0
Kleb_pneu_BIDMC_46a_V1	ST-37	0
Kleb_pneu_BIDMC_48_V1	ST-37	0
Kleb_pneu_BIDMC_53_V1	ST-37	0
Kleb_pneu_GCA_000710075.1_V1	ST-37	0
Kleb_pneu_GCA_000821585.1_V1	ST-37	0
Kleb_pneu_GCA_000821825.1_V1	ST-37	0
Kleb_pneu_GCA_000821945.1_V1	ST-37	0
Kleb_pneu_GCA_000822505.1_V1	ST-37	0
Kleb_pneu_GCA_000822545.1_V1	ST-37	0
Kleb_pneu_GCA_000822825.1_V1	ST-37	0
Kleb_pneu_GCA_001463445.1_V1	ST-37	0
Kleb_pneu_GCA_001663295.1_V1	ST-37	0
Kleb_pneu_GCA_001665995.1_V1	ST-37	0
Kleb_pneu_GCA_001702405.1_V1	ST-37	0
Kleb_pneu_GCA_001875125.1_V1	ST-37	0
Kleb_pneu_GCA_001931705.1_V1	ST-37	0
Kleb_pneu_GCA_002156745.1	ST-37	0
Kleb_pneu_GCA_002164765.1	ST-37	0
Kleb_pneu_GCA_002164795.1	ST-37	0
Kleb_pneu_GCA_002185285.1	ST-37	0
Kleb_pneu_GCA_002202195.1	ST-37	0
Kleb_pneu_GCA_002257795.1	ST-37	0
Kleb_pneu_GCA_002257865.1	ST-37	0
Kleb_pneu_GCA_002261815.1	ST-37	0
Kleb_pneu_GCA_002261855.1	ST-37	0
Kleb_pneu_GCA_002261895.1	ST-37	0
Kleb_pneu_GCA_002261915.1	ST-37	0
Kleb_pneu_GCA_002262015.1	ST-37	0
Kleb_pneu_GCA_002752995.1	ST-37	0
Kleb_pneu_GCA_002753355.1	ST-37	0
Kleb_pneu_GCA_002753375.1	ST-37	0
Kleb_pneu_GCA_900084485.1_V1	ST-37	0
Kleb_pneu_GCA_900093025.1_V1	ST-37	0
Kleb_pneu_GCA_900093235.1_V1	ST-37	0
Kleb_pneu_GCA_900093455.1_V1	ST-37	0
Kleb_pneu_GCA_900093465.1_V1	ST-37	0
Kleb_pneu_GCA_900173485.1_V1	ST-37	0
Kleb_pneu_GCA_900173495.1_V1	ST-37	0
Kleb_pneu_GCA_900173895.1_V1	ST-37	0
Kleb_pneu_GCA_900173925.1_V1	ST-37	0
Kleb_pneu_GCA_900174405.1_V1	ST-37	0
Kleb_pneu_MGH_30_V1	ST-37	0
Kleb_pneu_MGH_47_V1	ST-37	0
Kleb_pneu_MGH_72_V1	ST-37	0
Kleb_pneu_MGH82_V1	ST-37	0
[truncated: 455 more rows]
