# Supplementary material for: Genetic determinants facilitating the evolution of resistance to carbapenem antibiotics
Source: eLife journal article supplement (doi:10.7554/elife.67310), 2021-04-19
Supplement: supp [file elife-67310-supp-v1.zip › elife_poa_e67310_Supplementary_file_5.xlsx]

## Sheet: Supplementary file 5
Supplementary file 5. Spacer sequences in MGH21
Spacer ID	Sequences
Spacer1	AAATTCAGCAGGTCGCGGGATGCCGTGTTGTTG
Spacer2	GCGATCAGTCAGTCAAACCCGAACAGCGAGCTG
Spacer3	TAAACGAGCTTTTGTGCGCGCTGCGGGTTTGGG
Spacer4	GGATTTTGGTCAGACTTGTGCAGCCGCTGGCGA
Spacer5	TGCAAGACCCTGCTGCGAAAAAATCGCTTTTTG
Spacer6	TTCGGTGTTGGTGTGCGAGTGGGCTCAGCAGGG
Spacer7	GAGGATTTCGCCCGCTCTGGAGACCTCACGGTA
Spacer8	GCGCTGGTACAGCGACAACCACATAAAACGCGA
Spacer9	CCGACCGGGGAAGAGCAACGGAGCCCACTGCTA
Spacer10	AAATCCGGCGTCGAAACTTTCGAAATAGTACCG
Spacer11	TTTTGCGTGCGGCAGTACCAGCGACGCAGGGTG
Spacer12	TCCGCAAGGCCGCTTCCCGTTACACGGATGCCA
Spacer13	TACGTGAAGTTAAGGAGTCAAAATGATCCACGA
Spacer14	CCTGCGGATCAGCGTGGCGCGCTGGCAACTCGA
Spacer15	GTTTCCGCCGTAAAGGGGCGCACATAAACAACA
Spacer16	GCCTGAAAGTGTCGAAATCTCCAGAACCAGGAG
Spacer17	TGACCCTGATCGCCTCGCAAGCGGACATAAAGA
Spacer18	TCGCTATATGACAGCCCGCTATCGATCACGTAA
Spacer19	TCATAGCCGTTGTCCTGGCAAAAAATAGCGTCA
Spacer20	CAACGAGGTAAACGGGATCGTCCGTCGAGAAAG
Spacer21	TTTGTTTTGGGGGGATACCCAGGAATCCATCTA
Spacer22	GATGAAACCTGTTTTACGCTCGTTTTCGACGTA
Spacer23	AGGATAGAGCCAAATCCGCTCACACGTGATGAA
Spacer24	CCGGCATCCGTCAGCTCGACGACCAGCTGCAGG
Spacer25	AAAAAAGGAAGCAATTGCTCACTTAATGAAGGA
Spacer26	CCTCGTTACGGCGTCCTTTGCTGTCCCAGACAA
Spacer27	ACCACATCGCTAACGCGGCGCGGATATCGCGCA
Spacer28	CAGCGCAGAGCAGGCCAAGGGGCGCGATGACCA
Spacer29	TTTTCCCGCCAAGCGGGTGGAAGAGGTAAATCG
