# Supplementary material for: Genetic determinants facilitating the evolution of resistance to carbapenem antibiotics
Source: eLife journal article supplement (doi:10.7554/elife.67310), 2021-04-19
Supplement: supp [file elife-67310-supp-v1.zip › elife_poa_e67310_Supplementary_file_6.xlsx]

## Sheet: Supplementary file 6
Supplementary file 6. Prevalence of spacer-hit genes in plasmid sequences.
Spacer ID	No. of plasmids in the database	No. of plasmids with anibiotic resistance genes in the database	Total plasmids hit	Plasmids with antibiotic resistance genes	Multi-drug resistant plasmids	Plasmids with ß-lactamase genes	Plasmids with carbapenemase genes
spacer 11	6642	436	194	94	62	74	21
spacer 24	6642	436	144	66	44	32	12
