# Supplementary material for: Genetic determinants facilitating the evolution of resistance to carbapenem antibiotics
Source: eLife journal article supplement (doi:10.7554/elife.67310), 2021-04-19
Supplement: supp [file elife-67310-supp-v1.zip › elife_poa_e67310_Supplementary_file_7.xlsx]

## Sheet: Supplementary file 7
Supplementary file 7. ResFinder results of plasmids containing spacer11-hit gene.
Database	Resistance gene	Identity	Query / Template length	Contig	Position in contig	Predicted phenotype	Accession number
beta-lactam	blaCMY-107	99.91	1146 / 1146	NZ_CP019001.1	186683..187828	Warning: gene is missing from Notes file. Please inform curator.	GQ162215
beta-lactam	blaCMY-111	99.91	1146 / 1146	NZ_CP019001.1	186683..187828	Warning: gene is missing from Notes file. Please inform curator.	KJ155695
beta-lactam	blaCMY-130	99.91	1146 / 1146	NZ_CP019001.1	186683..187828	Warning: gene is missing from Notes file. Please inform curator.	KP207589
beta-lactam	blaCMY-132	99.91	1146 / 1146	NZ_CP019001.1	186683..187828	Warning: gene is missing from Notes file. Please inform curator.	KP862820
beta-lactam	blaCMY-133	99.91	1146 / 1146	NZ_CP019001.1	186683..187828	Warning: gene is missing from Notes file. Please inform curator.	KP862819
beta-lactam	blaCMY-134	99.91	1146 / 1146	NZ_CP019001.1	186683..187828	Warning: gene is missing from Notes file. Please inform curator.	KP860987
beta-lactam	blaCMY-140	99.91	1146 / 1146	NZ_CP019001.1	186683..187828	Warning: gene is missing from Notes file. Please inform curator.	KX354367
beta-lactam	blaCMY-143	99.91	1146 / 1146	NZ_CP019001.1	186683..187828	Warning: gene is missing from Notes file. Please inform curator.	KY009534
beta-lactam	blaCMY-153	99.91	1146 / 1146	NZ_CP019001.1	186683..187828	Warning: gene is missing from Notes file. Please inform curator.	MF042206
beta-lactam	blaCMY-17	99.91	1146 / 1146	NZ_CP019001.1	186683..187828	Beta-lactam resistance	AY513266
beta-lactam	blaCMY-2	100	1146 / 1146	NZ_CP012683.1	32698..33843	Beta-lactam resistance	X91840
beta-lactam	blaCMY-23	99.91	1146 / 1146	NZ_CP019001.1	186683..187828	Beta-lactam resistance	DQ438952
beta-lactam	blaCMY-24	99.91	1146 / 1146	NZ_CP019001.1	186683..187828	Beta-lactam resistance	EF415650
beta-lactam	blaCMY-27	99.91	1146 / 1146	NZ_CP019001.1	186683..187828	Beta-lactam resistance	EU515250
beta-lactam	blaCMY-30	99.91	1146 / 1146	NZ_CP019001.1	186683..187828	Beta-lactam resistance	LMYO01000054
beta-lactam	blaCMY-31	99.91	1146 / 1146	NZ_CP019001.1	186683..187828	Beta-lactam resistance	EF622224
beta-lactam	blaCMY-32	99.91	1146 / 1146	NZ_CP019001.1	186683..187828	Beta-lactam resistance	EU496815
beta-lactam	blaCMY-4	99.91	1146 / 1146	NZ_CP019001.1	186683..187828	Beta-lactam resistance	LNHZ01000079
beta-lactam	blaCMY-43	99.91	1146 / 1146	NZ_CP019001.1	186683..187828	Beta-lactam resistance	FJ360626
beta-lactam	blaCMY-56	99.91	1146 / 1146	NZ_CP019001.1	186683..187828	Beta-lactam resistance	HQ322613
beta-lactam	blaCMY-57	99.91	1146 / 1146	NZ_CP019001.1	186683..187828	Beta-lactam resistance	HQ285243
beta-lactam	blaCMY-58	99.91	1146 / 1146	NZ_CP019001.1	186683..187828	Beta-lactam resistance	HQ185697
beta-lactam	blaCMY-59	99.91	1146 / 1146	NZ_CP019001.1	186683..187828	Beta-lactam resistance	NG_048854
beta-lactam	blaCMY-6	99.91	1146 / 1146	NZ_CP019001.1	186683..187828	Beta-lactam resistance	AJ011293
beta-lactam	blaCMY-60	99.91	1146 / 1146	NZ_CP019001.1	186683..187828	Beta-lactam resistance	JF460794
beta-lactam	blaCMY-62	99.91	1146 / 1146	NZ_CP019001.1	186683..187828	Beta-lactam resistance	JF460796
beta-lactam	blaCMY-69	99.91	1146 / 1146	NZ_CP019001.1	186683..187828	Beta-lactam resistance	JX049132
beta-lactam	blaCMY-7	99.91	1146 / 1146	NZ_CP019001.1	186683..187828	Beta-lactam resistance	DQ173300
beta-lactam	blaCMY-94	99.91	1146 / 1146	NZ_CP019001.1	186683..187828	Beta-lactam resistance	JX514368
beta-lactam	blaCTX-M-1	98.74	876 / 876	NZ_CP021538.1	34354..35229	Beta-lactam resistance	DQ915955
beta-lactam	blaCTX-M-10	97.49	876 / 876	NZ_CP021947.1	43436..44311	Beta-lactam resistance	AY598759
beta-lactam	blaCTX-M-101	99.89	876 / 876	NZ_CP009115.1	17025..17900	Beta-lactam resistance	HQ398214
beta-lactam	blaCTX-M-102	99.89	876 / 876	NZ_CP018969.1	72693..73568	Beta-lactam resistance	HQ398215
beta-lactam	blaCTX-M-103	99.89	876 / 876	NZ_CP009115.1	17025..17900	Beta-lactam resistance	HG423149
beta-lactam	blaCTX-M-104	99.77	876 / 876	NZ_CP021180.1	125693..126568	Beta-lactam resistance	HQ833652
beta-lactam	blaCTX-M-105	99.77	876 / 876	NZ_CP021180.1	125693..126568	Beta-lactam resistance	HQ833651
beta-lactam	blaCTX-M-111	99.77	876 / 876	NZ_CP021180.1	125693..126568	Beta-lactam resistance	JF274243
beta-lactam	blaCTX-M-112	99.77	876 / 876	NZ_CP021180.1	125693..126568	Beta-lactam resistance	JF274246
beta-lactam	blaCTX-M-113	99.77	876 / 876	NZ_CP021180.1	125693..126568	Beta-lactam resistance	JF274247
beta-lactam	blaCTX-M-114	99.77	876 / 876	NZ_CP009860.1	119228..120103	Beta-lactam resistance	GQ351346
beta-lactam	blaCTX-M-116	99.32	876 / 876	NZ_CP014005.1	47694..48569	Beta-lactam resistance	JF966749
beta-lactam	blaCTX-M-117	99.89	876 / 876	NZ_CP009115.1	17025..17900	Beta-lactam resistance	JN227085
beta-lactam	blaCTX-M-12	98.97	876 / 876	NZ_CP018964.1	37186..38061	Beta-lactam resistance	DQ821704
beta-lactam	blaCTX-M-121	99.89	876 / 876	NZ_CP018969.1	72693..73568	Beta-lactam resistance	JN790862
beta-lactam	blaCTX-M-122	99.66	876 / 876	NZ_CP021871.1	49079..49954	Beta-lactam resistance	JN790863
beta-lactam	blaCTX-M-125	99.66	876 / 876	NZ_CP021871.1	49079..49954	Beta-lactam resistance	JQ724542
beta-lactam	blaCTX-M-126	99.66	876 / 876	NZ_CP021871.1	49079..49954	Beta-lactam resistance	AB703103
beta-lactam	blaCTX-M-127	99.89	876 / 876	NZ_CP009115.1	17025..17900	Beta-lactam resistance	MF196229
beta-lactam	blaCTX-M-129	99.89	876 / 876	NZ_CP018969.1	72693..73568	Beta-lactam resistance	JX017364
beta-lactam	blaCTX-M-134	99.89	876 / 876	NZ_CP018969.1	72693..73568	Beta-lactam resistance	JX896165
beta-lactam	blaCTX-M-136	99.54	876 / 876	NZ_CP012993.2	103184..104059	Beta-lactam resistance	KC351754
beta-lactam	blaCTX-M-138	98.52	876 / 876	NZ_CP021959.1	76528..77403	Beta-lactam resistance	KF526119
beta-lactam	blaCTX-M-139	99.89	876 / 876	NZ_CP009115.1	17025..17900	Beta-lactam resistance	KC107824
beta-lactam	blaCTX-M-14	100	876 / 876	NZ_CP012627.1	1335..2210	Beta-lactam resistance Amino acid sequences of CTX-M-14 and CTX-M-18 are identical	AF252622
beta-lactam	blaCTX-M-142	99.89	876 / 876	NZ_CP009115.1	17025..17900	Beta-lactam resistance	KF240809
beta-lactam	blaCTX-M-144	99.77	876 / 876	NZ_CP009860.1	119228..120103	Beta-lactam resistance	KJ020573
beta-lactam	blaCTX-M-146	98.63	876 / 876	NZ_CP021880.1	123732..124607	Beta-lactam resistance	KY938173
beta-lactam	blaCTX-M-147	99.66	876 / 876	NZ_CP021871.1	49079..49954	Beta-lactam resistance	KF513180
beta-lactam	blaCTX-M-15	100	876 / 876	NZ_HG941719.1	98937..99812	Beta-lactam resistance Alternate name; UOE-1	AY044436
beta-lactam	blaCTX-M-150	99.54	876 / 876	NZ_CP012993.2	103184..104059	Warning: gene is missing from Notes file. Please inform curator.	KF769131
beta-lactam	blaCTX-M-155	99.54	876 / 876	NZ_CP012993.2	103184..104059	Warning: gene is missing from Notes file. Please inform curator.	KM211508
beta-lactam	blaCTX-M-156	99.89	876 / 876	NZ_CP009115.1	17025..17900	Warning: gene is missing from Notes file. Please inform curator.	KM211509
beta-lactam	blaCTX-M-157	99.89	876 / 876	NZ_CP009115.1	17025..17900	Warning: gene is missing from Notes file. Please inform curator.	KM211510
beta-lactam	blaCTX-M-158	98.63	876 / 876	NZ_CP021880.1	123732..124607	Warning: gene is missing from Notes file. Please inform curator.	KM211691
beta-lactam	blaCTX-M-159	99.89	876 / 876	NZ_CP018969.1	72693..73568	Warning: gene is missing from Notes file. Please inform curator.	AB976602
beta-lactam	blaCTX-M-161	99.66	876 / 876	NZ_CP021871.1	49079..49954	Warning: gene is missing from Notes file. Please inform curator.	KP128034
beta-lactam	blaCTX-M-162	99.77	876 / 876	NZ_CP009860.1	119228..120103	Warning: gene is missing from Notes file. Please inform curator.	KP681697
beta-lactam	blaCTX-M-163	99.89	876 / 876	NZ_CP009115.1	17025..17900	Warning: gene is missing from Notes file. Please inform curator.	KP681698
beta-lactam	blaCTX-M-164	99.77	876 / 876	NZ_CP009860.1	119228..120103	Warning: gene is missing from Notes file. Please inform curator.	KP727571
beta-lactam	blaCTX-M-166	98.63	876 / 876	NZ_CP021880.1	123732..124607	Warning: gene is missing from Notes file. Please inform curator.	KU978909
beta-lactam	blaCTX-M-167	99.77	876 / 876	NZ_CP009860.1	119228..120103	Warning: gene is missing from Notes file. Please inform curator.	KR537428
beta-lactam	blaCTX-M-168	99.77	876 / 876	NZ_CP021180.1	125693..126568	Warning: gene is missing from Notes file. Please inform curator.	KR537429
beta-lactam	blaCTX-M-169	98.86	876 / 876	NZ_CP020904.1	63418..64293	Warning: gene is missing from Notes file. Please inform curator.	KR779864
beta-lactam	blaCTX-M-17	99.66	876 / 876	NZ_CP021871.1	49079..49954	Beta-lactam resistance	AY033516
beta-lactam	blaCTX-M-170	99.89	876 / 876	NZ_CP009115.1	17025..17900	Warning: gene is missing from Notes file. Please inform curator.	KR822223
beta-lactam	blaCTX-M-172	99.89	876 / 876	NZ_CP009115.1	17025..17900	Warning: gene is missing from Notes file. Please inform curator.	KT251041
beta-lactam	blaCTX-M-173	99.89	876 / 876	NZ_CP009115.1	17025..17900	Warning: gene is missing from Notes file. Please inform curator.	KT997884
beta-lactam	blaCTX-M-174	99.89	876 / 876	NZ_CP018969.1	72693..73568	Warning: gene is missing from Notes file. Please inform curator.	KT997886
beta-lactam	blaCTX-M-175	98.63	876 / 876	NZ_CP021880.1	123732..124607	Warning: gene is missing from Notes file. Please inform curator.	KT997887
beta-lactam	blaCTX-M-176	99.89	876 / 876	NZ_CP009115.1	17025..17900	Warning: gene is missing from Notes file. Please inform curator.	KT997888
beta-lactam	blaCTX-M-177	99.43	876 / 876	NZ_CP013657.1	136337..137212	Warning: gene is missing from Notes file. Please inform curator.	KT997889
beta-lactam	blaCTX-M-179	99.77	876 / 876	NZ_CP009860.1	119228..120103	Warning: gene is missing from Notes file. Please inform curator.	KU705393
beta-lactam	blaCTX-M-180	99.89	876 / 876	NZ_CP009115.1	17025..17900	Warning: gene is missing from Notes file. Please inform curator.	KX056899
beta-lactam	blaCTX-M-181	99.89	876 / 876	NZ_CP009115.1	17025..17900	Warning: gene is missing from Notes file. Please inform curator.	KX056900
beta-lactam	blaCTX-M-182	99.89	876 / 876	NZ_CP009115.1	17025..17900	Warning: gene is missing from Notes file. Please inform curator.	KX056901
beta-lactam	blaCTX-M-183	99.89	876 / 876	NZ_CP009115.1	17025..17900	Warning: gene is missing from Notes file. Please inform curator.	KX263246
beta-lactam	blaCTX-M-184	99.89	876 / 876	NZ_CP009115.1	17025..17900	Warning: gene is missing from Notes file. Please inform curator.	KX263247
beta-lactam	blaCTX-M-186	99.89	876 / 876	NZ_CP009115.1	17025..17900	Warning: gene is missing from Notes file. Please inform curator.	KX446939
beta-lactam	blaCTX-M-188	99.89	876 / 876	NZ_CP009115.1	17025..17900	Warning: gene is missing from Notes file. Please inform curator.	KX676491
beta-lactam	blaCTX-M-189	99.89	876 / 876	NZ_CP009115.1	17025..17900	Warning: gene is missing from Notes file. Please inform curator.	FJ657512
beta-lactam	blaCTX-M-19	99.77	876 / 876	NZ_CP021180.1	125693..126568	Beta-lactam resistance	AF325134
beta-lactam	blaCTX-M-190	99.77	876 / 876	NZ_CP009860.1	119228..120103	Warning: gene is missing from Notes file. Please inform curator.	KX664469
beta-lactam	blaCTX-M-191	99.77	876 / 876	NZ_CP021180.1	125693..126568	Warning: gene is missing from Notes file. Please inform curator.	KY271097
beta-lactam	blaCTX-M-192	99.89	876 / 876	NZ_CP018969.1	72693..73568	Warning: gene is missing from Notes file. Please inform curator.	KY271098
beta-lactam	blaCTX-M-193	99.89	876 / 876	NZ_CP009115.1	17025..17900	Warning: gene is missing from Notes file. Please inform curator.	KY563766
beta-lactam	blaCTX-M-194	99.89	876 / 876	NZ_CP009115.1	17025..17900	Warning: gene is missing from Notes file. Please inform curator.	KY563767
beta-lactam	blaCTX-M-195	99.89	876 / 876	NZ_CP018969.1	72693..73568	Warning: gene is missing from Notes file. Please inform curator.	KY563768
beta-lactam	blaCTX-M-196	99.89	876 / 876	NZ_CP018969.1	72693..73568	Warning: gene is missing from Notes file. Please inform curator.	KY563769
beta-lactam	blaCTX-M-197	99.89	876 / 876	NZ_CP009115.1	17025..17900	Warning: gene is missing from Notes file. Please inform curator.	KY646303
beta-lactam	blaCTX-M-198	99.77	876 / 876	NZ_CP021180.1	125693..126568	Warning: gene is missing from Notes file. Please inform curator.	KY646304
beta-lactam	blaCTX-M-201	99.77	876 / 876	NZ_CP021180.1	125693..126568	Warning: gene is missing from Notes file. Please inform curator.	KY997189
beta-lactam	blaCTX-M-202	99.89	876 / 876	NZ_CP009115.1	17025..17900	Warning: gene is missing from Notes file. Please inform curator.	MF195067
beta-lactam	blaCTX-M-203	99.77	876 / 876	NZ_CP009860.1	119228..120103	Warning: gene is missing from Notes file. Please inform curator.	MF196230
beta-lactam	blaCTX-M-204	99.77	876 / 876	NZ_CP009860.1	119228..120103	Warning: gene is missing from Notes file. Please inform curator.	MF281085
beta-lactam	blaCTX-M-206	99.2	876 / 876	NZ_CP014757.1	19140..20015	Warning: gene is missing from Notes file. Please inform curator.	KJ802520
beta-lactam	blaCTX-M-207	99.77	876 / 876	NZ_CP009860.1	119228..120103	Warning: gene is missing from Notes file. Please inform curator.	LC348384
beta-lactam	blaCTX-M-208	99.89	876 / 876	NZ_CP009115.1	17025..17900	Warning: gene is missing from Notes file. Please inform curator.	MH067958
beta-lactam	blaCTX-M-209	99.89	876 / 876	NZ_CP009115.1	17025..17900	Warning: gene is missing from Notes file. Please inform curator.	MH067959
beta-lactam	blaCTX-M-210	99.89	876 / 876	NZ_CP009115.1	17025..17900	Warning: gene is missing from Notes file. Please inform curator.	MH067960
beta-lactam	blaCTX-M-212	99.32	876 / 876	NZ_CP014005.1	47694..48569	Warning: gene is missing from Notes file. Please inform curator.	MH067962
beta-lactam	blaCTX-M-216	99.89	876 / 876	NZ_CP009115.1	17025..17900	Warning: gene is missing from Notes file. Please inform curator.	MH243352
beta-lactam	blaCTX-M-218	99.89	876 / 876	NZ_CP009115.1	17025..17900	Warning: gene is missing from Notes file. Please inform curator.	MH243358
beta-lactam	blaCTX-M-22	99.77	876 / 876	NZ_CP009860.1	119228..120103	Beta-lactam resistance	AY080894
beta-lactam	blaCTX-M-220	99.77	876 / 876	NZ_CP009860.1	119228..120103	Warning: gene is missing from Notes file. Please inform curator.	MH450163
beta-lactam	blaCTX-M-23	98.86	876 / 876	NZ_CP020904.1	63418..64293	Beta-lactam resistance	AF488377
beta-lactam	blaCTX-M-24	99.77	876 / 876	NZ_CP021180.1	125693..126568	Beta-lactam resistance	EF374096
beta-lactam	blaCTX-M-27	100	876 / 876	NZ_CP015140.1	124449..125324	Beta-lactam resistance	AY156923
beta-lactam	blaCTX-M-28	99.77	876 / 876	NZ_CP009860.1	119228..120103	Beta-lactam resistance	AJ549244
beta-lactam	blaCTX-M-29	99.2	876 / 876	NZ_CP014757.1	19140..20015	Beta-lactam resistance	AY267213
beta-lactam	blaCTX-M-3	99.89	876 / 876	NZ_CP009115.1	17025..17900	Beta-lactam resistance Amino acid sequences of CTX-M-3 and CTX-M-133 are identical	Y10278
beta-lactam	blaCTX-M-30	98.63	876 / 876	NZ_CP021880.1	123732..124607	Beta-lactam resistance	AY292654
beta-lactam	blaCTX-M-32	98.86	876 / 876	NZ_CP020904.1	63418..64293	Beta-lactam resistance	AJ557142
beta-lactam	blaCTX-M-33	99.89	876 / 876	NZ_CP009115.1	17025..17900	Beta-lactam resistance	AY238472
beta-lactam	blaCTX-M-36	98.86	876 / 876	NZ_CP020904.1	63418..64293	Beta-lactam resistance	AB177384
beta-lactam	blaCTX-M-37	97.83	875 / 876	NZ_CP021941.1	30898..31772	Beta-lactam resistance	AY649755
beta-lactam	blaCTX-M-38	99.77	876 / 876	NZ_CP021180.1	125693..126568	Beta-lactam resistance	AY822595
beta-lactam	blaCTX-M-42	99.77	876 / 876	NZ_CP009860.1	119228..120103	Beta-lactam resistance	DQ061159
beta-lactam	blaCTX-M-47	99.77	876 / 876	NZ_CP021180.1	125693..126568	Beta-lactam resistance	AY847143
beta-lactam	blaCTX-M-48	99.77	876 / 876	NZ_CP021180.1	125693..126568	Beta-lactam resistance	AY847144
beta-lactam	blaCTX-M-49	99.66	876 / 876	NZ_CP021871.1	49079..49954	Beta-lactam resistance	AY847145
beta-lactam	blaCTX-M-50	99.77	876 / 876	NZ_CP021180.1	125693..126568	Beta-lactam resistance	AY847146
beta-lactam	blaCTX-M-52	99.66	876 / 876	NZ_CP012988.3	103184..104059	Beta-lactam resistance	DQ223685
beta-lactam	blaCTX-M-54	99.77	876 / 876	NZ_CP009860.1	119228..120103	Beta-lactam resistance	DQ303459
beta-lactam	blaCTX-M-55	99.89	876 / 876	NZ_CP009115.1	17025..17900	Beta-lactam resistance Amino acid sequences of CTX-M-55 and CTX-M-57 are identical	DQ810789
beta-lactam	blaCTX-M-58	98.63	876 / 876	NZ_CP021880.1	123732..124607	Beta-lactam resistance	EF210159
beta-lactam	blaCTX-M-60	98.86	876 / 876	NZ_CP020904.1	63418..64293	Beta-lactam resistance	AM411407
beta-lactam	blaCTX-M-61	98.86	876 / 876	NZ_CP020904.1	63418..64293	Beta-lactam resistance	EF219142
beta-lactam	blaCTX-M-62	98.86	876 / 876	NZ_CP020904.1	63418..64293	Beta-lactam resistance	EF219134
beta-lactam	blaCTX-M-65	100	876 / 876	NZ_CP018455.1	2607..3482	Beta-lactam resistance	EF418608
beta-lactam	blaCTX-M-66	99.77	876 / 876	NZ_CP009860.1	119228..120103	Beta-lactam resistance	EF576988
beta-lactam	blaCTX-M-67	99.77	876 / 876	NZ_CP021180.1	125693..126568	Beta-lactam resistance	EF581888
beta-lactam	blaCTX-M-69	99.66	876 / 876	NZ_CP012988.3	103184..104059	Beta-lactam resistance	EU402393
beta-lactam	blaCTX-M-71	99.89	876 / 876	NZ_CP009115.1	17025..17900	Beta-lactam resistance	FJ815436
beta-lactam	blaCTX-M-72	99.77	876 / 876	NZ_CP009860.1	119228..120103	Beta-lactam resistance	AY847148
beta-lactam	blaCTX-M-79	99.77	876 / 876	NZ_CP009860.1	119228..120103	Beta-lactam resistance	EF426798
beta-lactam	blaCTX-M-80	99.66	876 / 876	NZ_CP012988.3	103184..104059	Beta-lactam resistance	EU202673
beta-lactam	blaCTX-M-82	99.89	876 / 876	NZ_CP009115.1	17025..17900	Beta-lactam resistance	DQ256091
beta-lactam	blaCTX-M-83	99.77	876 / 876	NZ_CP021180.1	125693..126568	Beta-lactam resistance	FJ214366
beta-lactam	blaCTX-M-84	99.77	876 / 876	NZ_CP021180.1	125693..126568	Beta-lactam resistance	FJ214367
beta-lactam	blaCTX-M-85	99.77	876 / 876	NZ_CP021180.1	125693..126568	Beta-lactam resistance	FJ214368
beta-lactam	blaCTX-M-86	99.77	876 / 876	NZ_CP021180.1	125693..126568	Beta-lactam resistance	FJ214369
beta-lactam	blaCTX-M-87	99.66	876 / 876	NZ_CP021871.1	49079..49954	Beta-lactam resistance	EU545409
beta-lactam	blaCTX-M-88	99.89	876 / 876	NZ_CP009115.1	17025..17900	Beta-lactam resistance	FJ873739
beta-lactam	blaCTX-M-90	99.77	876 / 876	NZ_CP021180.1	125693..126568	Beta-lactam resistance	FJ907381
beta-lactam	blaCTX-M-93	99.89	876 / 876	NZ_CP018969.1	72693..73568	Beta-lactam resistance	HQ166709
beta-lactam	blaCTX-M-96	99.09	876 / 876	NZ_CP016925.1	24896..25771	Beta-lactam resistance	AJ704396
beta-lactam	blaCTX-M-98	99.89	876 / 876	NZ_CP018969.1	72693..73568	Beta-lactam resistance	HM755448
beta-lactam	blaCTX-M-99	99.66	876 / 876	NZ_CP021871.1	49079..49954	Beta-lactam resistance	HM803271
beta-lactam	blaIMP-26	99.87	741 / 741	NZ_CP021328.1	366938..367678	Beta-lactam resistance	GU045307
beta-lactam	blaIMP-38	99.87	741 / 741	NZ_CP021328.1	366938..367678	Beta-lactam resistance	HQ875573
beta-lactam	blaIMP-4	100	741 / 741	NZ_CP016763.1	113651..114391	Beta-lactam resistance	AF244145
beta-lactam	blaIMP-59	99.87	741 / 741	NZ_CP021328.1	366938..367678	Warning: gene is missing from Notes file. Please inform curator.	KX196782
beta-lactam	blaKPC-10	99.89	882 / 882	NZ_CP008830.1	15984..16865	Beta-lactam resistance	GQ140348
beta-lactam	blaKPC-11	99.89	882 / 882	NZ_CP011981.1	12173..13054	Beta-lactam resistance	HM066995
beta-lactam	blaKPC-12	99.89	882 / 882	NZ_CP011981.1	12173..13054	Beta-lactam resistance	HQ641422
beta-lactam	blaKPC-13	99.77	882 / 882	NZ_CP009773.1	37750..38631	Beta-lactam resistance	HQ342889
beta-lactam	blaKPC-14	99.32	882 / 876	NZ_CP008833.1	15984..16865	Beta-lactam resistance	JX524191
beta-lactam	blaKPC-15	99.09	882 / 882	NZ_CP010363.1	51911..52792	Beta-lactam resistance	KC433553
beta-lactam	blaKPC-16	99.66	882 / 882	NZ_CP008791.1	63574..64455	Beta-lactam resistance	KC465199
beta-lactam	blaKPC-17	99.89	882 / 882	NZ_CP011981.1	12173..13054	Warning: gene is missing from Notes file. Please inform curator.	KC465200
beta-lactam	blaKPC-18	99.89	882 / 882	NZ_CP011981.1	12173..13054	Warning: gene is missing from Notes file. Please inform curator.	KT884517
beta-lactam	blaKPC-19	99.77	882 / 882	NZ_CP009773.1	37750..38631	Warning: gene is missing from Notes file. Please inform curator.	KJ775801
beta-lactam	blaKPC-2	100	882 / 882	NC_016846.1	20557..21438	Beta-lactam resistance	AY034847
beta-lactam	blaKPC-21	99.89	882 / 882	NZ_CP011981.1	12173..13054	Warning: gene is missing from Notes file. Please inform curator.	LN609376
beta-lactam	blaKPC-22	99.77	882 / 882	NZ_CP011991.1	81054..81935	Warning: gene is missing from Notes file. Please inform curator.	KM379100
beta-lactam	blaKPC-23	99.89	882 / 882	NZ_CP008830.1	15984..16865	Warning: gene is missing from Notes file. Please inform curator.	MH450213
beta-lactam	blaKPC-24	99.89	882 / 882	NZ_CP011981.1	12173..13054	Warning: gene is missing from Notes file. Please inform curator.	KR052099
beta-lactam	blaKPC-25	99.32	887 / 887	NZ_CP022349.1	23816..24696	Warning: gene is missing from Notes file. Please inform curator.	KU216748
beta-lactam	blaKPC-26	99.89	882 / 882	NZ_CP011981.1	12173..13054	Warning: gene is missing from Notes file. Please inform curator.	KX619622
beta-lactam	blaKPC-27	99.89	882 / 882	NZ_CP008830.1	15984..16865	Warning: gene is missing from Notes file. Please inform curator.	KX828722
beta-lactam	blaKPC-28	99.32	882 / 876	NZ_CP009776.1	37742..38623	Warning: gene is missing from Notes file. Please inform curator.	KY282958
beta-lactam	blaKPC-3	100	882 / 882	NZ_CP007730.1	15984..16865	Beta-lactam resistance	HM769262
beta-lactam	blaKPC-30	99.89	882 / 882	NZ_CP011981.1	12173..13054	Warning: gene is missing from Notes file. Please inform curator.	KY646302
beta-lactam	blaKPC-31	99.89	882 / 882	NZ_CP008830.1	15984..16865	Warning: gene is missing from Notes file. Please inform curator.	MAPH01000113
beta-lactam	blaKPC-32	99.77	882 / 882	NZ_CP009773.1	37750..38631	Warning: gene is missing from Notes file. Please inform curator.	MAPO01000050
beta-lactam	blaKPC-33	99.89	882 / 882	NZ_CP011981.1	12173..13054	Warning: gene is missing from Notes file. Please inform curator.	CP025144
beta-lactam	blaKPC-34	100	825 / 906	NZ_CP018455.1	21575..22399	Warning: gene is missing from Notes file. Please inform curator.	KU985429
beta-lactam	blaKPC-35	99.89	882 / 882	NZ_CP011981.1	12173..13054	Warning: gene is missing from Notes file. Please inform curator.	MH404098
beta-lactam	blaKPC-4	99.77	882 / 882	NZ_CP011991.1	81054..81935	Beta-lactam resistance	FJ473382
beta-lactam	blaKPC-5	99.89	882 / 882	NZ_CP011981.1	12173..13054	Beta-lactam resistance	EU400222
beta-lactam	blaKPC-6	99.89	882 / 882	NZ_CP011981.1	12173..13054	Beta-lactam resistance	EU555534
beta-lactam	blaKPC-7	99.89	882 / 882	NZ_CP008830.1	15984..16865	Beta-lactam resistance	EU729727
beta-lactam	blaKPC-8	99.89	882 / 882	NZ_CP008830.1	15984..16865	Beta-lactam resistance	FJ234412
beta-lactam	blaKPC-9	99.88	854 / 854	NZ_CP006926.1	37765..38618	Beta-lactam resistance	FJ624872
beta-lactam	blaNDM-1	100	813 / 813	NC_021501.1	38689..39501	Beta-lactam resistance	FN396876
beta-lactam	blaNDM-10	99.38	813 / 813	NZ_CP021941.1	17698..18510	Beta-lactam resistance	KF361506
beta-lactam	blaNDM-11	99.88	813 / 813	NZ_CP009115.1	30287..31099	Beta-lactam resistance	KP265939
beta-lactam	blaNDM-12	99.75	813 / 813	NZ_CP014757.1	5941..6753	Beta-lactam resistance	AB926431
beta-lactam	blaNDM-13	99.75	813 / 813	NZ_CP014757.1	5941..6753	Beta-lactam resistance	LC012596
beta-lactam	blaNDM-14	99.88	813 / 813	NZ_CP009115.1	30287..31099	Beta-lactam resistance	KM210086
beta-lactam	blaNDM-15	99.75	813 / 813	NZ_CP014757.1	5941..6753	Beta-lactam resistance	KP735848
beta-lactam	blaNDM-16	99.88	813 / 813	NZ_CP009115.1	30287..31099	Beta-lactam resistance	KP862821
beta-lactam	blaNDM-17	99.63	813 / 813	NZ_CP018366.1	66819..67631	Beta-lactam resistance	KX812714
beta-lactam	blaNDM-19	99.63	813 / 813	NZ_CP018366.1	66819..67631	Warning: gene is missing from Notes file. Please inform curator.	MF370080
beta-lactam	blaNDM-2	99.88	813 / 813	NZ_CP009115.1	30287..31099	Beta-lactam resistance	JF703135
beta-lactam	blaNDM-20	99.63	813 / 813	NZ_CP018366.1	66819..67631	Warning: gene is missing from Notes file. Please inform curator.	KY654092
beta-lactam	blaNDM-21	99.63	813 / 813	NZ_CP018366.1	66819..67631	Warning: gene is missing from Notes file. Please inform curator.	MG183694
beta-lactam	blaNDM-22	99.88	813 / 813	NZ_CP009115.1	30287..31099	Warning: gene is missing from Notes file. Please inform curator.	MH243357
beta-lactam	blaNDM-23	99.88	813 / 813	NZ_CP009115.1	30287..31099	Warning: gene is missing from Notes file. Please inform curator.	MH450214
beta-lactam	blaNDM-24	99.88	813 / 813	NZ_CP009115.1	30287..31099	Warning: gene is missing from Notes file. Please inform curator.	MH450215
beta-lactam	blaNDM-3	99.88	813 / 813	NZ_CP009115.1	30287..31099	Beta-lactam resistance	JQ734687
beta-lactam	blaNDM-4	99.88	813 / 813	NZ_CP009115.1	30287..31099	Beta-lactam resistance	JQ348841
beta-lactam	blaNDM-5	99.75	813 / 813	NZ_CP014757.1	5941..6753	Beta-lactam resistance	JN104597
beta-lactam	blaNDM-6	99.88	813 / 813	NZ_CP009115.1	30287..31099	Beta-lactam resistance	JN967644
beta-lactam	blaNDM-7	99.75	813 / 813	NZ_CP014757.1	5941..6753	Beta-lactam resistance	JX262694
beta-lactam	blaNDM-8	99.75	813 / 813	NZ_CP014757.1	5941..6753	Beta-lactam resistance	AB744718
beta-lactam	blaNDM-9	100	813 / 813	NZ_CP017283.1	4381..5193	Beta-lactam resistance	KC999080
beta-lactam	blaOXA-1	100	831 / 831	NZ_HG941719.1	103849..104679	Beta-lactam resistance	HQ170510
beta-lactam	blaOXA-2	100	828 / 828	NZ_CP011634.1	69154..69981	Beta-lactam resistance	DQ112222
beta-lactam	blaOXA-224	99.64	831 / 831	NZ_CP013833.1	69128..69958	Beta-lactam resistance	JN412067
beta-lactam	blaOXA-31	99.64	831 / 831	NZ_CP013833.1	69128..69958	Beta-lactam resistance	AF294653
beta-lactam	blaOXA-320	99.88	831 / 831	NC_022651.1	32586..33416	Beta-lactam resistance	KF151169
beta-lactam	blaOXA-392	97.95	831 / 831	NZ_CP014321.1	101394..102224	Warning: gene is missing from Notes file. Please inform curator.	AB901044
beta-lactam	blaOXA-4	99.76	831 / 831	NZ_CP013657.1	131483..132313	Beta-lactam resistance	AY162283
beta-lactam	blaOXA-47	97.83	831 / 831	NZ_CP014757.1	24774..25604	Beta-lactam resistance	AY237830
beta-lactam	blaOXA-534	99.88	831 / 831	NC_022651.1	32586..33416	Warning: gene is missing from Notes file. Please inform curator.	KX714285
beta-lactam	blaOXA-9	100	825 / 825	NZ_CP006926.1	49090..49914	Beta-lactam resistance	KQ089875
beta-lactam	blaSHV-107	99.42	861 / 861	NZ_CP021328.1	206140..207000	Beta-lactam resistance	AM922308
beta-lactam	blaSHV-11	99.77	861 / 861	NZ_CP023503.1	112750..113610	Beta-lactam resistance Alternate name; SHV-1-2a	X98101
beta-lactam	blaSHV-12	100	861 / 861	NC_009650.1	10117..10977	Beta-lactam resistance Alternate name; SHV-5-2a	KF976405
beta-lactam	blaSHV-120	99.54	861 / 861	NZ_CP021857.1	24824..25684	Beta-lactam resistance	JF812965
beta-lactam	blaSHV-128	99.42	861 / 861	NZ_CP021328.1	206140..207000	Beta-lactam resistance	GU932590
beta-lactam	blaSHV-129	99.65	861 / 861	NZ_CP018455.1	12670..13530	Beta-lactam resistance	GU827715
beta-lactam	blaSHV-13	99.77	861 / 861	NZ_CP023503.1	112750..113610	Beta-lactam resistance	AF164577
beta-lactam	blaSHV-134	99.88	861 / 861	NZ_CP009776.1	67599..68459	Beta-lactam resistance	HM559945
beta-lactam	blaSHV-135	99.42	861 / 861	NZ_CP021328.1	206140..207000	Beta-lactam resistance	HQ637576
beta-lactam	blaSHV-142	99.42	861 / 861	NZ_CP021328.1	206140..207000	Beta-lactam resistance	JQ029959
beta-lactam	blaSHV-15	99.77	861 / 861	NZ_CP010881.1	72814..73674	Beta-lactam resistance	AJ011428
beta-lactam	blaSHV-154	99.53	858 / 858	NZ_CP021545.1	53409..54266	Beta-lactam resistance	JX121121
beta-lactam	blaSHV-160	99.88	861 / 861	NZ_CP009776.1	67599..68459	Beta-lactam resistance	JX121127
beta-lactam	blaSHV-161	99.42	861 / 861	NZ_CP021328.1	206140..207000	Beta-lactam resistance	JX121128
beta-lactam	blaSHV-165	99.53	858 / 858	NZ_CP021545.1	53409..54266	Beta-lactam resistance	JX121131
beta-lactam	blaSHV-172	99.54	861 / 861	NZ_CP021857.1	24824..25684	Beta-lactam resistance	KF513177
beta-lactam	blaSHV-173	99.42	861 / 861	NZ_CP021328.1	206140..207000	Beta-lactam resistance	KF513178
beta-lactam	blaSHV-178	99.42	861 / 861	NZ_CP021328.1	206140..207000	Beta-lactam resistance	KF705209
beta-lactam	blaSHV-185	99.77	861 / 861	NZ_CP023503.1	112750..113610	Beta-lactam resistance	KM233164
beta-lactam	blaSHV-2	99.54	861 / 861	NZ_CP021857.1	24824..25684	Beta-lactam resistance	AF148851
beta-lactam	blaSHV-200	99.54	861 / 861	NZ_CP021857.1	24824..25684	Warning: gene is missing from Notes file. Please inform curator.	MF871643
beta-lactam	blaSHV-203	99.54	861 / 861	NZ_CP021857.1	24824..25684	Warning: gene is missing from Notes file. Please inform curator.	MG028656
beta-lactam	blaSHV-25	99.77	861 / 861	NZ_CP023503.1	112750..113610	Beta-lactam resistance	AF208796
beta-lactam	blaSHV-26	99.42	861 / 861	NZ_CP021328.1	206140..207000	Beta-lactam resistance	AF227204
beta-lactam	blaSHV-2a	99.65	861 / 861	NZ_CP018455.1	12670..13530	Beta-lactam resistance	X98102
beta-lactam	blaSHV-31	99.77	861 / 861	NZ_CP023503.1	112750..113610	Beta-lactam resistance	AY277255
beta-lactam	blaSHV-36	99.42	861 / 861	NZ_CP021328.1	206140..207000	Beta-lactam resistance	AF467947
beta-lactam	blaSHV-46	99.42	861 / 861	NZ_CP021328.1	206140..207000	Beta-lactam resistance	AY210887
beta-lactam	blaSHV-5	100	861 / 861	NZ_CP021541.1	90528..91388	Beta-lactam resistance	X55640
beta-lactam	blaSHV-60	99.54	861 / 861	NZ_CP021857.1	24824..25684	Beta-lactam resistance	AB302939
beta-lactam	blaSHV-61	99.54	861 / 861	NZ_CP021857.1	24824..25684	Beta-lactam resistance	AJ866284
beta-lactam	blaSHV-64	99.77	861 / 861	NZ_CP010881.1	72814..73674	Beta-lactam resistance	DQ174304
beta-lactam	blaSHV-66	99.88	861 / 861	NZ_CP009776.1	67599..68459	Beta-lactam resistance	DQ174306
beta-lactam	blaSHV-67	99.42	861 / 861	NZ_CP021328.1	206140..207000	Beta-lactam resistance	DQ174307
beta-lactam	blaSHV-69	99.77	861 / 861	NZ_CP023503.1	112750..113610	Beta-lactam resistance	DQ174308
beta-lactam	blaSHV-70	99.77	861 / 861	NZ_CP023503.1	112750..113610	Beta-lactam resistance	DQ013287
beta-lactam	blaSHV-77	99.42	861 / 861	NZ_CP021328.1	206140..207000	Beta-lactam resistance	EF373975
beta-lactam	blaSHV-80	99.42	861 / 861	NZ_CP021328.1	206140..207000	Beta-lactam resistance	AM176555
beta-lactam	blaSHV-86	99.77	861 / 861	NZ_CP010881.1	72814..73674	Beta-lactam resistance	DQ328802
beta-lactam	blaSHV-98	99.42	861 / 861	NZ_CP021328.1	206140..207000	Beta-lactam resistance	AM941844
beta-lactam	blaTEM-10	99.77	861 / 861	NC_022651.1	35959..36819	Beta-lactam resistance Alternate name; MGH-1, blaTEM-23, blaTEM-E3	AF093512
beta-lactam	blaTEM-104	99.77	861 / 861	NC_022651.1	35959..36819	Beta-lactam resistance	AF516719
beta-lactam	blaTEM-105	99.88	861 / 861	NZ_HG941719.1	39866..40726	Beta-lactam resistance	AF516720
beta-lactam	blaTEM-106	99.77	861 / 861	NC_022651.1	35959..36819	Beta-lactam resistance	AY101578
beta-lactam	blaTEM-107	99.54	861 / 861	NZ_CP021733.1	66809..67669	Beta-lactam resistance	AY101764
beta-lactam	blaTEM-109	99.54	861 / 861	NZ_CP010882.1	67585..68445	Beta-lactam resistance Alternate name; CMT-5	AY628175
beta-lactam	blaTEM-11	99.3	861 / 861	NZ_CP021900.1	46851..47711	Beta-lactam resistance Alternate name; CAZ-lo	AY874537
beta-lactam	blaTEM-110	99.3	861 / 861	NZ_CP011621.1	56883..57743	Beta-lactam resistance	AY072920
beta-lactam	blaTEM-111	99.19	861 / 861	NZ_CP013326.1	56883..57743	Beta-lactam resistance	AF468003
beta-lactam	blaTEM-112	99.77	861 / 861	NZ_CP009115.1	10296..11156	Beta-lactam resistance	AY589493
beta-lactam	blaTEM-114	98.95	861 / 861	NZ_CP022698.1	92855..93715	Beta-lactam resistance	AY589495
beta-lactam	blaTEM-115	99.42	861 / 861	NZ_CP010363.1	64775..65635	Beta-lactam resistance	AF535127
beta-lactam	blaTEM-116	99.77	861 / 861	NZ_CP009115.1	10296..11156	Beta-lactam resistance	AY425988
beta-lactam	blaTEM-12	99.42	861 / 861	NZ_CP021541.1	77352..78212	Beta-lactam resistance Alternate name; YOU-2, CAZ-3, blaTEM-E2	M88143
beta-lactam	blaTEM-120	99.42	861 / 861	NZ_CP021541.1	77352..78212	Beta-lactam resistance	AY243512
beta-lactam	blaTEM-121	98.84	861 / 861	NZ_CP014321.1	104767..105627	Beta-lactam resistance Alternate name; CMT-4	AY307374
beta-lactam	blaTEM-122	99.77	861 / 861	NZ_CP007730.1	28051..28911	Beta-lactam resistance	AY307100
beta-lactam	blaTEM-124	99.07	861 / 858	NZ_CP012993.2	106881..107741	Beta-lactam resistance	AY327540
beta-lactam	blaTEM-125	98.61	861 / 861	NZ_CP018455.1	157349..158209	Beta-lactam resistance Alternate name; CTM-type	AY628176
beta-lactam	blaTEM-126	99.77	861 / 861	NC_022651.1	35959..36819	Beta-lactam resistance	AY628199
beta-lactam	blaTEM-127	99.88	861 / 861	NZ_HG941719.1	39866..40726	Beta-lactam resistance	AY368236
beta-lactam	blaTEM-128	99.88	861 / 861	NZ_HG941719.1	39866..40726	Beta-lactam resistance	AY368237
beta-lactam	blaTEM-129	99.19	861 / 861	NZ_CP012988.3	106881..107741	Beta-lactam resistance	AJ746225
beta-lactam	blaTEM-130	98.95	861 / 861	NZ_CP013657.1	87033..87893	Beta-lactam resistance	AJ866988
beta-lactam	blaTEM-131	98.84	861 / 861	NZ_CP015077.1	78556..79416	Beta-lactam resistance	AY436361
beta-lactam	blaTEM-132	99.65	861 / 861	NZ_CP010372.1	123614..124474	Beta-lactam resistance	AY491682
beta-lactam	blaTEM-133	99.3	861 / 861	NZ_CP021900.1	46851..47711	Beta-lactam resistance	AY528425
beta-lactam	blaTEM-134	98.95	861 / 861	NZ_CP022698.1	92855..93715	Beta-lactam resistance	AY574271
beta-lactam	blaTEM-135	99.77	861 / 861	NZ_CP007730.1	28051..28911	Beta-lactam resistance	GQ896333
beta-lactam	blaTEM-136	99.42	861 / 861	NZ_CP011986.1	24240..25100	Beta-lactam resistance	AY826417
beta-lactam	blaTEM-137	99.19	861 / 861	NZ_CP013326.1	56883..57743	Beta-lactam resistance	AM286274
beta-lactam	blaTEM-138	99.07	861 / 861	NZ_CP022693.1	25215..26075	Beta-lactam resistance	AY853593
beta-lactam	blaTEM-139	99.07	861 / 861	NZ_CP012993.2	106881..107741	Beta-lactam resistance	DQ072853
beta-lactam	blaTEM-141	99.77	861 / 861	NZ_CP007730.1	28051..28911	Beta-lactam resistance	AY956335
beta-lactam	blaTEM-142	98.95	861 / 861	NZ_CP022698.1	92855..93715	Beta-lactam resistance	DQ388882
beta-lactam	blaTEM-143	99.88	861 / 861	NZ_HG941719.1	39866..40726	Beta-lactam resistance	DQ075245
beta-lactam	blaTEM-144	99.77	861 / 861	NC_022651.1	35959..36819	Beta-lactam resistance	AM049400
beta-lactam	blaTEM-145	99.42	861 / 861	NZ_CP020057.1	15880..16740	Beta-lactam resistance	DQ105528
beta-lactam	blaTEM-146	99.77	861 / 861	NZ_CP009115.1	10296..11156	Beta-lactam resistance	DQ105529
beta-lactam	blaTEM-147	99.65	861 / 861	NZ_CP008830.1	28051..28911	Beta-lactam resistance	DQ279850
beta-lactam	blaTEM-148	99.88	861 / 861	NZ_HG941719.1	39866..40726	Beta-lactam resistance	AM087454
beta-lactam	blaTEM-149	98.95	861 / 861	NZ_CP023145.1	23783..24643	Beta-lactam resistance	DQ369751
beta-lactam	blaTEM-15	99.77	861 / 861	NC_022651.1	35959..36819	Beta-lactam resistance	AM849805
beta-lactam	blaTEM-150	99.88	861 / 861	NZ_CP006926.1	50614..51474	Beta-lactam resistance	AM183304
beta-lactam	blaTEM-151	98.95	861 / 861	NZ_CP022698.1	92855..93715	Beta-lactam resistance Alternate name; CTM-type	DQ834729
beta-lactam	blaTEM-152	99.07	861 / 861	NZ_CP015387.1	118598..119458	Beta-lactam resistance Alternate name; CTM-type	DQ834728
beta-lactam	blaTEM-153	99.54	861 / 861	NZ_CP009776.1	50606..51466	Beta-lactam resistance	KC149518
beta-lactam	blaTEM-154	99.77	861 / 861	NZ_CP009115.1	10296..11156	Beta-lactam resistance Alternate name; CTM-type	FJ807656
beta-lactam	blaTEM-155	99.42	861 / 861	NZ_CP021541.1	77352..78212	Beta-lactam resistance	DQ679961
beta-lactam	blaTEM-156	99.88	861 / 861	NZ_CP006926.1	50614..51474	Beta-lactam resistance	AM941159
beta-lactam	blaTEM-157	99.54	861 / 861	NZ_CP009776.1	50606..51466	Beta-lactam resistance	DQ909059
beta-lactam	blaTEM-158	99.65	861 / 861	NZ_CP010372.1	123614..124474	Beta-lactam resistance Alternate name; CTM-9	EF534736
beta-lactam	blaTEM-159	99.3	861 / 861	NZ_CP021900.1	46851..47711	Beta-lactam resistance	EF136376
beta-lactam	blaTEM-16	99.07	861 / 861	NZ_CP022693.1	25215..26075	Beta-lactam resistance Alternate name; CAZ-7	X65254
beta-lactam	blaTEM-160	99.3	861 / 861	NZ_CP021900.1	46851..47711	Beta-lactam resistance	EF136377
beta-lactam	blaTEM-162	99.07	861 / 861	NZ_CP015387.1	118598..119458	Beta-lactam resistance	EF468463
beta-lactam	blaTEM-163	99.65	861 / 861	NZ_CP008830.1	28051..28911	Beta-lactam resistance	EU815939
beta-lactam	blaTEM-164	99.77	861 / 861	NC_022651.1	35959..36819	Beta-lactam resistance	EU274580
beta-lactam	blaTEM-166	99.88	861 / 861	NZ_HG941719.1	39866..40726	Beta-lactam resistance	FJ197316
beta-lactam	blaTEM-167	98.84	861 / 861	NZ_CP018992.1	77646..78506	Beta-lactam resistance	FJ360884
beta-lactam	blaTEM-168	99.88	861 / 861	NZ_CP006926.1	50614..51474	Beta-lactam resistance	FJ919776
beta-lactam	blaTEM-169	99.65	861 / 861	NZ_CP008830.1	28051..28911	Beta-lactam resistance	KP012538
beta-lactam	blaTEM-17	99.42	861 / 861	NZ_CP010363.1	64775..65635	Beta-lactam resistance	Y14574
beta-lactam	blaTEM-171	99.88	861 / 861	NZ_CP006926.1	50614..51474	Beta-lactam resistance	GQ149347
beta-lactam	blaTEM-176	99.88	861 / 861	NZ_HG941719.1	39866..40726	Beta-lactam resistance	GU550123
beta-lactam	blaTEM-181	99.88	861 / 861	NZ_CP006926.1	50614..51474	Beta-lactam resistance	KM977568
beta-lactam	blaTEM-182	99.65	861 / 861	NZ_CP010372.1	123614..124474	Beta-lactam resistance	HQ317449
beta-lactam	blaTEM-183	99.88	861 / 861	NZ_CP006926.1	50614..51474	Beta-lactam resistance	HQ529916
beta-lactam	blaTEM-184	98.95	861 / 861	NZ_CP022698.1	92855..93715	Beta-lactam resistance	FR848831
beta-lactam	blaTEM-185	99.42	861 / 861	NZ_CP010363.1	64775..65635	Beta-lactam resistance	JF795538
beta-lactam	blaTEM-186	99.88	861 / 861	NZ_HG941719.1	39866..40726	Beta-lactam resistance	JN227084
beta-lactam	blaTEM-188	99.19	861 / 861	NZ_CP013326.1	56883..57743	Beta-lactam resistance	JN211012
beta-lactam	blaTEM-189	99.77	861 / 861	NZ_CP009115.1	10296..11156	Beta-lactam resistance	JN254627
beta-lactam	blaTEM-19	99.42	861 / 861	NZ_CP021541.1	77352..78212	Beta-lactam resistance	JX042489
beta-lactam	blaTEM-190	99.19	861 / 861	NZ_CP013326.1	56883..57743	Beta-lactam resistance	JN416112
beta-lactam	blaTEM-191	99.42	861 / 861	NZ_CP021541.1	77352..78212	Beta-lactam resistance	KY432484
beta-lactam	blaTEM-196	99.77	861 / 861	NC_022651.1	35959..36819	Beta-lactam resistance	JQ034306
beta-lactam	blaTEM-197	99.65	861 / 861	NZ_CP009773.1	50614..51474	Beta-lactam resistance	HQ877606
beta-lactam	blaTEM-198	99.88	861 / 861	NZ_HG941719.1	39866..40726	Beta-lactam resistance	AB700703
beta-lactam	blaTEM-1A	100	861 / 861	NC_009650.1	21882..22742	Beta-lactam resistance Alternate name; RblaTEM-1	HM749966
beta-lactam	blaTEM-1B	100	861 / 861	NC_009651.1	87578..88438	Beta-lactam resistance Alternate name; RblaTEM-1	AY458016
beta-lactam	blaTEM-1C	100	861 / 861	NZ_CP018999.1	97914..98774	Beta-lactam resistance Alternate name; RblaTEM-1	FJ560503
beta-lactam	blaTEM-1D	99.54	861 / 861	NZ_CP020904.1	70162..71022	Beta-lactam resistance Alternate name; RblaTEM-1	AF188200
beta-lactam	blaTEM-2	99.3	861 / 861	NZ_CP011621.1	56883..57743	Beta-lactam resistance	AJ251946
beta-lactam	blaTEM-2	99.42	861 / 861	NZ_CP010363.1	64775..65635	Beta-lactam resistance	X54606
beta-lactam	blaTEM-20	99.65	861 / 861	NZ_CP020064.1	20621..21481	Beta-lactam resistance	EU527189
beta-lactam	blaTEM-201	99.77	861 / 861	NC_022651.1	35959..36819	Beta-lactam resistance	JX310327
beta-lactam	blaTEM-205	99.18	858 / 858	NZ_CP018815.1	60725..61582	Beta-lactam resistance	KC900516
beta-lactam	blaTEM-206	99.88	861 / 861	NZ_HG941719.1	39866..40726	Beta-lactam resistance	KC783461
beta-lactam	blaTEM-207	99.88	861 / 861	NZ_HG941719.1	39866..40726	Beta-lactam resistance	KC818234
beta-lactam	blaTEM-208	99.88	861 / 861	NZ_HG941719.1	39866..40726	Beta-lactam resistance	KC865667
beta-lactam	blaTEM-209	99.77	861 / 861	NZ_CP007730.1	28051..28911	Beta-lactam resistance	KF240808
beta-lactam	blaTEM-21	98.95	858 / 858	NZ_CP013832.1	76064..76921	Beta-lactam resistance	Y17582
beta-lactam	blaTEM-210	99.77	861 / 861	NC_022651.1	35959..36819	Beta-lactam resistance	KJ484630
beta-lactam	blaTEM-212	99.42	861 / 861	NZ_CP010363.1	64775..65635	Beta-lactam resistance	KF481968
beta-lactam	blaTEM-213	99.88	861 / 861	NZ_HG941719.1	39866..40726	Beta-lactam resistance	LJEE02000034
beta-lactam	blaTEM-214	99.88	861 / 861	NZ_HG941719.1	39866..40726	Beta-lactam resistance	KP050491
beta-lactam	blaTEM-215	99.88	861 / 861	NZ_HG941719.1	39866..40726	Beta-lactam resistance	KP050492
beta-lactam	blaTEM-216	99.77	861 / 861	NC_022651.1	35959..36819	Beta-lactam resistance	KF944358
beta-lactam	blaTEM-217	99.88	861 / 861	NZ_HG941719.1	39866..40726	Beta-lactam resistance	HG934763
beta-lactam	blaTEM-219	99.77	861 / 861	NZ_CP009115.1	10296..11156	Beta-lactam resistance	KM114268
beta-lactam	blaTEM-22	98.95	858 / 858	NZ_CP013832.1	76064..76921	Beta-lactam resistance	Y17583
beta-lactam	blaTEM-220	99.77	861 / 861	NC_022651.1	35959..36819	Warning: gene is missing from Notes file. Please inform curator.	KM998962
beta-lactam	blaTEM-224	98.84	861 / 861	NZ_CP015914.1	127238..128098	Warning: gene is missing from Notes file. Please inform curator.	KU664545
beta-lactam	blaTEM-225	99.42	861 / 861	NZ_CP021778.1	42574..43434	Warning: gene is missing from Notes file. Please inform curator.	KY432403
beta-lactam	blaTEM-226	99.65	861 / 861	NZ_CP010372.1	123614..124474	Warning: gene is missing from Notes file. Please inform curator.	KY646301
beta-lactam	blaTEM-227	98.84	861 / 861	NZ_CP014498.1	203905..204765	Warning: gene is missing from Notes file. Please inform curator.	KY418040
beta-lactam	blaTEM-229	99.65	861 / 861	NZ_CP009773.1	50614..51474	Warning: gene is missing from Notes file. Please inform curator.	MG821356
beta-lactam	blaTEM-230	99.77	861 / 861	NC_022651.1	35959..36819	Warning: gene is missing from Notes file. Please inform curator.	MG821377
beta-lactam	blaTEM-231	99.88	861 / 861	NZ_CP006926.1	50614..51474	Warning: gene is missing from Notes file. Please inform curator.	MG821378
beta-lactam	blaTEM-232	99.77	861 / 861	NC_022651.1	35959..36819	Warning: gene is missing from Notes file. Please inform curator.	MH079593
beta-lactam	blaTEM-233	99.19	861 / 861	NZ_CP012988.3	106881..107741	Warning: gene is missing from Notes file. Please inform curator.	MH270416
beta-lactam	blaTEM-234	99.88	861 / 861	NZ_HG941719.1	39866..40726	Warning: gene is missing from Notes file. Please inform curator.	MH243353
beta-lactam	blaTEM-24	98.95	861 / 861	NZ_CP022698.1	92855..93715	Beta-lactam resistance Alternate name; CAZ-1	GQ293500
beta-lactam	blaTEM-26	99.77	861 / 861	NZ_CP009115.1	10296..11156	Beta-lactam resistance Alternate name; YOU-1	LDCJ01000052
beta-lactam	blaTEM-28	99.77	861 / 861	NC_022651.1	35959..36819	Beta-lactam resistance	U37195
beta-lactam	blaTEM-29	99.77	861 / 861	NZ_CP007730.1	28051..28911	Beta-lactam resistance	DQ269440
beta-lactam	blaTEM-3	99.07	861 / 861	NZ_CP022693.1	25215..26075	Beta-lactam resistance Alternate name; blaCTX-1, blaTEM-14	X64523
beta-lactam	blaTEM-30	99.88	861 / 861	NZ_HG941719.1	39866..40726	Beta-lactam resistance Alternate name; blaTEM-30	AJ437107
beta-lactam	blaTEM-32	99.65	861 / 861	NZ_CP020064.1	20621..21481	Beta-lactam resistance Alternate name; IRT-3	CXLQ01000061
beta-lactam	blaTEM-33	99.88	861 / 861	NZ_HG941719.1	39866..40726	Beta-lactam resistance Alternate name; IRT-5	GU371926
beta-lactam	blaTEM-34	99.88	861 / 861	NZ_HG941719.1	39866..40726	Beta-lactam resistance Alternate name; blaTEM-34	KC292503
beta-lactam	blaTEM-35	99.77	861 / 861	NC_022651.1	35959..36819	Beta-lactam resistance Alternate name; IRT-4	KP860986
beta-lactam	blaTEM-36	99.77	861 / 861	NC_022651.1	35959..36819	Beta-lactam resistance Alternate name; IRT-7	KY305958
beta-lactam	blaTEM-4	98.95	861 / 861	NZ_CP023145.1	23783..24643	Beta-lactam resistance	LK391770
beta-lactam	blaTEM-40	99.77	861 / 861	NZ_CP009115.1	10296..11156	Beta-lactam resistance Alternate name; IRT-167, IRT-11	FR717535
beta-lactam	blaTEM-43	99.54	861 / 861	NZ_CP011991.1	93121..93981	Beta-lactam resistance	U95363
beta-lactam	blaTEM-45	99.3	861 / 861	NZ_CP021900.1	46851..47711	Beta-lactam resistance Alternate name; IRT-14	X95401
beta-lactam	blaTEM-47	99.3	861 / 861	NZ_CP011634.1	179195..180055	Beta-lactam resistance	Y10279
beta-lactam	blaTEM-48	99.07	861 / 861	NZ_CP015387.1	118598..119458	Beta-lactam resistance	Y10280
beta-lactam	blaTEM-49	98.84	861 / 861	NZ_CP014321.1	104767..105627	Beta-lactam resistance	Y10281
beta-lactam	blaTEM-52	99.65	861 / 861	NZ_CP009773.1	50614..51474	Beta-lactam resistance	Y13612
beta-lactam	blaTEM-52B	99.88	861 / 861	NZ_CP021690.1	114397..115257	Beta-lactam resistance	AF027199
beta-lactam	blaTEM-52C	99.54	861 / 861	NZ_CP020904.1	70162..71022	Beta-lactam resistance	EF141186
beta-lactam	blaTEM-53	99.3	861 / 861	NZ_CP011621.1	56883..57743	Beta-lactam resistance	AF104441
beta-lactam	blaTEM-54	99.88	861 / 861	NZ_CP006926.1	50614..51474	Beta-lactam resistance	AF104442
beta-lactam	blaTEM-55	99.77	861 / 861	NZ_CP007730.1	28051..28911	Beta-lactam resistance	DQ286729
beta-lactam	blaTEM-57	99.77	861 / 861	NZ_CP007730.1	28051..28911	Beta-lactam resistance	FJ405211
beta-lactam	blaTEM-6	99.77	861 / 861	NZ_CP009115.1	10296..11156	Beta-lactam resistance	X57972
beta-lactam	blaTEM-63	98.95	861 / 861	NZ_CP022698.1	92855..93715	Beta-lactam resistance Alternate name; blaTEM-64	AF332513
beta-lactam	blaTEM-67	99.07	861 / 861	NZ_CP022693.1	25215..26075	Beta-lactam resistance	AF091113
beta-lactam	blaTEM-68	99.19	861 / 861	NZ_CP012988.3	106881..107741	Beta-lactam resistance Alternate name; CMT-2	AJ239002
beta-lactam	blaTEM-70	99.88	861 / 861	NZ_HG941719.1	39866..40726	Beta-lactam resistance	AF188199
beta-lactam	blaTEM-71	99.3	861 / 861	NZ_CP011621.1	56883..57743	Beta-lactam resistance	AF203816
beta-lactam	blaTEM-72	99.07	861 / 861	NZ_CP015387.1	118598..119458	Beta-lactam resistance	AF157553
beta-lactam	blaTEM-76	99.88	861 / 861	NZ_HG941719.1	39866..40726	Beta-lactam resistance Alternate name; IRT-20	AF190694
beta-lactam	blaTEM-77	99.77	861 / 861	NC_022651.1	35959..36819	Beta-lactam resistance Alternate name; IRT-21	AF190695
beta-lactam	blaTEM-78	99.07	861 / 861	NZ_CP022693.1	25215..26075	Beta-lactam resistance Alternate name; IRT-22	AF190693
beta-lactam	blaTEM-79	99.77	861 / 861	NZ_CP007730.1	28051..28911	Beta-lactam resistance	AF190692
beta-lactam	blaTEM-8	98.95	861 / 861	NZ_CP022698.1	92855..93715	Beta-lactam resistance Alternate name; CAZ-2	X65252
beta-lactam	blaTEM-80	99.65	861 / 861	NZ_CP009773.1	50614..51474	Beta-lactam resistance Alternate name; IRT-24	AF347054
beta-lactam	blaTEM-81	99.77	861 / 861	NZ_CP009115.1	10296..11156	Beta-lactam resistance	AF427127
beta-lactam	blaTEM-82	99.77	861 / 861	NZ_CP009115.1	10296..11156	Beta-lactam resistance	AF427128
beta-lactam	blaTEM-83	99.19	861 / 861	NZ_CP013326.1	56883..57743	Beta-lactam resistance	AF427129
beta-lactam	blaTEM-84	99.42	861 / 861	NZ_CP021541.1	77352..78212	Beta-lactam resistance	AF427130
beta-lactam	blaTEM-85	99.07	861 / 861	NZ_CP015387.1	118598..119458	Beta-lactam resistance	AJ277414
beta-lactam	blaTEM-86	98.84	861 / 861	NZ_CP014498.1	203905..204765	Beta-lactam resistance	AJ277415
beta-lactam	blaTEM-87	98.84	861 / 861	NZ_CP018982.1	67782..68642	Beta-lactam resistance	AF250872
beta-lactam	blaTEM-88	99.54	861 / 861	NZ_CP021733.1	66809..67669	Beta-lactam resistance	AY027590
beta-lactam	blaTEM-9	98.95	861 / 861	NZ_CP023145.1	23783..24643	Beta-lactam resistance Alternate name; RHH-1	KY271103
beta-lactam	blaTEM-90	99.88	861 / 861	NZ_CP006926.1	50614..51474	Beta-lactam resistance Alternate name; TLE-1	AF351241
beta-lactam	blaTEM-91	99.54	861 / 861	NZ_CP020904.1	70162..71022	Beta-lactam resistance	AB049569
beta-lactam	blaTEM-92	99.07	861 / 861	NZ_CP015387.1	118598..119458	Beta-lactam resistance	AF143804
beta-lactam	blaTEM-93	99.65	861 / 861	NZ_CP009773.1	50614..51474	Beta-lactam resistance	AJ318093
beta-lactam	blaTEM-94	98.84	861 / 861	NZ_CP014498.1	203905..204765	Beta-lactam resistance	AJ318094
beta-lactam	blaTEM-95	99.88	861 / 861	NZ_HG941719.1	39866..40726	Beta-lactam resistance	AJ308558
beta-lactam	blaTEM-96	99.65	861 / 861	NZ_CP020064.1	20621..21481	Beta-lactam resistance	AY092401
beta-lactam	blaTEM-97	99.66	595 / 861	NZ_CP014005.1	49351..49945	Beta-lactam resistance Alternate name; blaTEM-34	AF397067
beta-lactam	blaTEM-98	99.66	595 / 861	NZ_CP014005.1	49351..49945	Beta-lactam resistance Alternate name; blaTEM-1	AF397068
beta-lactam	blaTEM-99	99.76	818 / 861	NZ_CP011135.1	52646..53463	Beta-lactam resistance Alternate name; blaTEM-30	AF397066
quinolone	aac(6')-Ib-cr	100	600 / 600	NZ_HG941719.1	104810..105409	Fluoroquinolone and aminoglycoside resistance	DQ303918
quinolone	aac(6')-Ib-cr	99.81	519 / 519	NC_022651.1	33547..34065	Fluoroquinolone and aminoglycoside resistance	EF636461
quinolone	oqxA	100	1176 / 1176	NZ_CP015914.1	124029..125204	Quinolone resistance	EU370913
quinolone	oqxB	100	3153 / 3153	NZ_CP015914.1	120853..124005	Quinolone resistance	EU370913
quinolone	qnrB1	100	645 / 645	NZ_CP012988.3	90158..90802	Warning: gene is missing from Notes file. Please inform curator.	DQ351241
quinolone	qnrB17	99.22	645 / 645	NZ_CP012993.2	90158..90802	Warning: gene is missing from Notes file. Please inform curator.	AM919398
quinolone	qnrB3	99.07	645 / 645	NZ_CP016925.1	38153..38797	Warning: gene is missing from Notes file. Please inform curator.	DQ303920
quinolone	qnrB6	99.22	645 / 645	NZ_CP012993.2	90158..90802	Warning: gene is missing from Notes file. Please inform curator.	EF520349
quinolone	qnrB6	99.07	645 / 645	NZ_CP016925.1	38153..38797	Warning: gene is missing from Notes file. Please inform curator.	EF523819
quinolone	qnrB66	99.07	645 / 645	NZ_CP016925.1	38153..38797	Warning: gene is missing from Notes file. Please inform curator.	KC580655
quinolone	qnrB77	98.91	645 / 645	NZ_CP023503.1	118284..118928	Warning: gene is missing from Notes file. Please inform curator.	KM985470
quinolone	qnrS1	100	657 / 657	NZ_CP009115.1	22541..23197	Warning: gene is missing from Notes file. Please inform curator.	AB187515
quinolone	qnrS2	90.26	657 / 657	NZ_CP021946.1	73221..73876	Warning: gene is missing from Notes file. Please inform curator.	DQ485530
quinolone	qnrS3	99.85	656 / 656	NZ_CP017386.1	149087..149742	Warning: gene is missing from Notes file. Please inform curator.	EU077611
quinolone	qnrS4	99.85	657 / 657	NZ_CP014757.1	13843..14499	Warning: gene is missing from Notes file. Please inform curator.	FJ418153
quinolone	qnrS5	96.19	656 / 657	NZ_CP021941.1	25601..26256	Warning: gene is missing from Notes file. Please inform curator.	HQ631377
quinolone	qnrS6	90.11	657 / 657	NZ_CP021947.1	48952..49607	Warning: gene is missing from Notes file. Please inform curator.	HQ631376
quinolone	qnrS7	99.85	657 / 657	NZ_CP014757.1	13843..14499	Warning: gene is missing from Notes file. Please inform curator.	KF730651
quinolone	qnrS8	99.85	657 / 657	NZ_CP014757.1	13843..14499	Warning: gene is missing from Notes file. Please inform curator.	KF730652
quinolone	qnrS9	99.85	657 / 657	NZ_CP014757.1	13843..14499	Warning: gene is missing from Notes file. Please inform curator.	KF732714
tetracycline	tet(A)	99.92	1275 / 1275	NZ_CP019001.1	152060..153334	Tetracycline resistance	AF534183
tetracycline	tet(A)	99.83	1200 / 1200	NZ_CP012988.3	80731..81930	Tetracycline resistance	AJ313332
tetracycline	tet(A)	99.75	1200 / 1200	NZ_CP012993.2	80731..81930	Tetracycline resistance	AJ419171
tetracycline	tet(A)	100	1200 / 1200	NZ_HG941719.1	108864..110063	Tetracycline resistance	AJ517790
tetracycline	tet(A)	99.42	1200 / 1200	NZ_CP013657.1	126099..127298	Tetracycline resistance	AY196695
tetracycline	tet(A)	99.17	1201 / 1200	NZ_CP013833.1	73946..75145	Tetracycline resistance	X00006
tetracycline	tet(B)	100	1206 / 1206	NZ_CP010372.1	91939..93144	Tetracycline resistance	AF326777
tetracycline	tet(B)	99.59	1206 / 1206	NZ_CP018947.1	84326..85531	Tetracycline resistance	AJ277653
tetracycline	tet(B)	99.92	1206 / 1206	NZ_CP008715.1	92038..93243	Tetracycline resistance	AP000342
tetracycline	tet(D)	100	1185 / 1185	NC_009651.1	85914..87098	Tetracycline resistance	AF467077
tetracycline	tet(D)	99.83	1185 / 1185	NZ_CP017386.1	19982..21166	Tetracycline resistance	X65876
trimethoprim	dfrA1	99.79	474 / 474	NZ_CP012566.1	83888..84361	Trimethoprim resistance	AB188271
trimethoprim	dfrA1	99.79	474 / 474	NZ_CP012566.1	83888..84361	Trimethoprim resistance	AB199789
trimethoprim	dfrA1	99.79	474 / 474	NZ_CP017935.1	60080..60553	Trimethoprim resistance	AF203818
trimethoprim	dfrA1	99.79	474 / 474	NZ_CP017935.1	60080..60553	Trimethoprim resistance	AJ238350
trimethoprim	dfrA1	99.79	474 / 474	NZ_CP012566.1	83888..84361	Trimethoprim resistance	AY141977
trimethoprim	dfrA1	99.58	474 / 474	NZ_CP021741.1	63844..64317	Trimethoprim resistance	EU089668
trimethoprim	dfrA1	99.79	474 / 474	NZ_CP012566.1	83888..84361	Trimethoprim resistance	FJ001872
trimethoprim	dfrA1	99.58	474 / 474	NZ_CP021741.1	63844..64317	Trimethoprim resistance	FJ215857
trimethoprim	dfrA1	99.79	474 / 474	NZ_CP012566.1	83888..84361	Trimethoprim resistance	FJ591049
trimethoprim	dfrA1	99.79	474 / 474	NZ_CP012566.1	83888..84361	Trimethoprim resistance	FM207631
trimethoprim	dfrA1	99.79	474 / 474	NZ_CP012566.1	83888..84361	Trimethoprim resistance	GU726913
trimethoprim	dfrA1	100	474 / 474	NZ_CP012571.1	87656..88129	Trimethoprim resistance	X00926
trimethoprim	dfrA12	99.6	498 / 498	NZ_CP017285.1	108230..108727	Trimethoprim resistance	AB196348
trimethoprim	dfrA12	100	498 / 498	NZ_CP014005.1	52145..52642	Trimethoprim resistance	AM040708
trimethoprim	dfrA12	99.6	498 / 498	NZ_CP017285.1	108230..108727	Trimethoprim resistance	AY551331
trimethoprim	dfrA12	99.8	498 / 498	NZ_CP017283.1	12511..13008	Trimethoprim resistance	DQ995286
trimethoprim	dfrA12	99.8	498 / 498	NZ_CP017283.1	12511..13008	Trimethoprim resistance	EU650399
trimethoprim	dfrA12	99.8	498 / 498	NZ_CP017283.1	12511..13008	Trimethoprim resistance	FM877486
trimethoprim	dfrA12	99.4	498 / 498	NZ_CP021328.1	78450..78947	Trimethoprim resistance	FR875302
trimethoprim	dfrA14	99.79	474 / 474	NZ_CP009773.1	68986..69459	Trimethoprim resistance	AF393510
trimethoprim	dfrA14	99.59	483 / 483	NZ_CP012988.3	94085..94567	Trimethoprim resistance	DQ388123
trimethoprim	dfrA14	100	474 / 474	NZ_CP006926.1	65316..65789	Trimethoprim resistance	KF921535
trimethoprim	dfrA14	98.95	475 / 474	NZ_CP010363.1	79478..79951	Trimethoprim resistance	Z50804
trimethoprim	dfrA14	99.37	474 / 474	NZ_CP009776.1	65309..65782	Trimethoprim resistance	Z50805
trimethoprim	dfrA17	99.79	474 / 474	NZ_CP009860.1	71421..71894	Trimethoprim resistance	AB196349
trimethoprim	dfrA17	99.79	474 / 474	NZ_CP009860.1	71421..71894	Trimethoprim resistance	AF180469
trimethoprim	dfrA17	99.79	474 / 474	NZ_CP009860.1	71421..71894	Trimethoprim resistance	AM932673
trimethoprim	dfrA17	99.79	474 / 474	NZ_CP009860.1	71421..71894	Trimethoprim resistance	AM937244
trimethoprim	dfrA17	100	474 / 474	NZ_HG941719.1	88981..89454	Trimethoprim resistance	FJ460238
trimethoprim	dfrA17	99.79	474 / 474	NZ_CP009860.1	71421..71894	Trimethoprim resistance	FJ807902
trimethoprim	dfrA17	99.58	474 / 474	NZ_CP013657.1	140122..140595	Trimethoprim resistance	GU358475
trimethoprim	dfrA17	99.79	474 / 474	NZ_CP009860.1	71421..71894	Trimethoprim resistance	JN645876
trimethoprim	dfrA17	99.79	474 / 474	NZ_CP009860.1	71421..71894	Trimethoprim resistance	JN645879
trimethoprim	dfrA17	99.58	474 / 474	NZ_CP013657.1	140122..140595	Trimethoprim resistance	JQ414038
trimethoprim	dfrA17	99.79	474 / 474	NZ_CP009860.1	71421..71894	Trimethoprim resistance	JQ837988
trimethoprim	dfrA25	100	459 / 459	NZ_CP018999.1	9678..10136	Trimethoprim resistance	DQ267940
trimethoprim	dfrA32	90.72	474 / 474	NZ_CP013832.1	15665..16138	Trimethoprim resistance	GU067642
trimethoprim	dfrA7	100	474 / 474	NZ_CP010372.1	113303..113776	Trimethoprim resistance	AB161450
trimethoprim	dfrA7	90.93	474 / 474	NZ_CP008715.1	80172..80645	Trimethoprim resistance	EU339235
trimethoprim	dfrA7	90.72	474 / 474	NZ_CP013832.1	15665..16138	Trimethoprim resistance	FN563072
trimethoprim	dfrA8	100	510 / 510	NZ_CP020057.1	17831..18340	Trimethoprim resistance	U10186
phenicol	catA1	99.85	660 / 660	NZ_CP010372.1	88288..88947	Phenicol resistance	V00622
phenicol	catA2	96.11	642 / 642	NZ_CP021328.1	51577..52218	Phenicol resistance	X53796
phenicol	catB3	99.84	633 / 633	NZ_CP018960.1	53574..54206	Phenicol resistance	AJ009818
phenicol	catB3	100	633 / 633	NZ_CP014757.1	24004..24636	Phenicol resistance	U13880
phenicol	cmlA1	99.76	1260 / 1260	NZ_CP021733.1	60722..61981	Phenicol resistance	M64556
phenicol	floR	98.19	1214 / 1215	NZ_CP021946.1	87969..89182	Phenicol resistance	AF118107
macrolide	erm(B)	99.86	738 / 738	NZ_CP009860.1	60981..61718	Macrolide resistance	JN899585
macrolide	erm(B)	99.73	738 / 738	NZ_CP018960.1	39257..39994	Macrolide resistance	M19270
macrolide	erm(B)	99.73	738 / 738	NZ_CP018960.1	39257..39994	Macrolide resistance	U18931
macrolide	erm(B)	99.59	738 / 738	NZ_CP019028.1	64890..65627	Macrolide resistance	U86375
macrolide	erm(B)	99.59	738 / 738	NZ_CP019028.1	64890..65627	Macrolide resistance	X72021
macrolide	mph(A)	100	906 / 906	NZ_HG941719.1	97070..97975	Macrolide resistance	D16251
macrolide	mph(A)	99.67	922 / 921	NZ_CP009860.1	62900..63821	Macrolide resistance	U36578
macrolide	mph(E)	100	885 / 885	NZ_CP021328.1	377827..378711	Macrolide resistance	DQ839391
macrolide	msr(E)	100	1476 / 1476	NZ_CP021328.1	376296..377771	Macrolide, Lincosamide and Streptogramin B resistance	FR751518
sulphonamide	sul1	99.88	840 / 840	NZ_CP009860.1	69116..69955	Sulphonamide resistance	AJ564903
sulphonamide	sul1	99.88	840 / 840	NZ_CP009860.1	69116..69955	Sulphonamide resistance	AJ746361
sulphonamide	sul1	99.76	840 / 840	NZ_CP021937.1	19270..20109	Sulphonamide resistance	AJ971344
sulphonamide	sul1	99.88	840 / 840	NZ_CP009860.1	69116..69955	Sulphonamide resistance	AM040449
sulphonamide	sul1	99.88	840 / 840	NZ_CP009860.1	69116..69955	Sulphonamide resistance	AM746675
sulphonamide	sul1	99.76	840 / 840	NZ_CP017935.1	61942..62781	Sulphonamide resistance	AY115475
sulphonamide	sul1	99.88	840 / 840	NZ_CP009860.1	69116..69955	Sulphonamide resistance	AY260546
sulphonamide	sul1	99.88	829 / 828	NZ_CP013657.1	142061..142889	Sulphonamide resistance	AY522923
sulphonamide	sul1	99.88	840 / 840	NZ_CP009860.1	69116..69955	Sulphonamide resistance	AY524415
sulphonamide	sul1	99.88	840 / 840	NZ_CP009860.1	69116..69955	Sulphonamide resistance	AY878717
sulphonamide	sul1	99.88	840 / 840	NZ_CP009860.1	69116..69955	Sulphonamide resistance	DQ125241
sulphonamide	sul1	99.88	831 / 831	NZ_CP011634.1	71323..72153	Sulphonamide resistance	DQ143913
sulphonamide	sul1	100	819 / 882	NZ_CP008715.1	82111..82929	Sulphonamide resistance	DQ914960
sulphonamide	sul1	99.88	840 / 840	NZ_CP009860.1	69116..69955	Sulphonamide resistance	EF667294
sulphonamide	sul1	99.88	840 / 840	NZ_CP009860.1	69116..69955	Sulphonamide resistance	EU117158
sulphonamide	sul1	99.88	867 / 867	NZ_HG941719.1	90893..91759	Sulphonamide resistance	EU780013
sulphonamide	sul1	99.88	840 / 840	NZ_CP009860.1	69116..69955	Sulphonamide resistance	EU855787
sulphonamide	sul1	99.88	840 / 840	NZ_CP009860.1	69116..69955	Sulphonamide resistance	GU562437
sulphonamide	sul1	100	840 / 840	NZ_CP014296.1	72276..73115	Sulphonamide resistance	JF262165
sulphonamide	sul1	99.88	840 / 840	NZ_CP009860.1	69116..69955	Sulphonamide resistance	JF262178
sulphonamide	sul1	99.88	837 / 837	NZ_CP010372.1	114350..115186	Sulphonamide resistance	JN581942
sulphonamide	sul1	99.76	840 / 840	NZ_CP014757.1	22064..22903	Sulphonamide resistance	JN790946
sulphonamide	sul1	100	840 / 840	NC_009651.1	34075..34914	Sulphonamide resistance	U12338
sulphonamide	sul1	99.88	840 / 840	NC_021501.1	47229..48068	Sulphonamide resistance	X15024
sulphonamide	sul2	99.88	816 / 816	NZ_CP018954.1	88304..89119	Sulphonamide resistance	AB366440
sulphonamide	sul2	99.88	816 / 816	NZ_CP006926.1	53894..54709	Sulphonamide resistance	AF497970
sulphonamide	sul2	99.63	816 / 816	NZ_CP009773.1	53895..54710	Sulphonamide resistance	AF542061
sulphonamide	sul2	99.75	816 / 816	NZ_CP008791.1	56505..57320	Sulphonamide resistance	AJ289135
sulphonamide	sul2	99.88	816 / 816	NZ_CP006926.1	53894..54709	Sulphonamide resistance	AJ319822
sulphonamide	sul2	100	808 / 819	NZ_CP011135.1	50336..51143	Sulphonamide resistance	AJ514834
sulphonamide	sul2	99.88	816 / 816	NZ_CP006926.1	53894..54709	Sulphonamide resistance	AJ830710
sulphonamide	sul2	99.88	816 / 816	NZ_CP006926.1	53894..54709	Sulphonamide resistance	AJ830714
sulphonamide	sul2	99.63	819 / 819	NZ_CP012988.3	110162..110977	Sulphonamide resistance	AM183225
sulphonamide	sul2	100	816 / 816	NC_009651.1	18529..19344	Sulphonamide resistance	AY034138
sulphonamide	sul2	99.88	816 / 816	NZ_CP006926.1	53894..54709	Sulphonamide resistance	AY232670
sulphonamide	sul2	99.39	816 / 816	NZ_CP018999.1	125167..125982	Sulphonamide resistance	AY524415
sulphonamide	sul2	100	815 / 852	NZ_CP012993.2	110163..110977	Sulphonamide resistance	FJ197818
sulphonamide	sul2	99.88	816 / 816	NZ_CP006926.1	53894..54709	Sulphonamide resistance	FJ968160
sulphonamide	sul2	99.88	816 / 816	NZ_CP018954.1	88304..89119	Sulphonamide resistance	FN995456
sulphonamide	sul2	100	816 / 816	NZ_CP015077.1	82633..83448	Sulphonamide resistance	HQ840942
sulphonamide	sul2	99.88	816 / 816	NZ_CP006926.1	53894..54709	Sulphonamide resistance	U57647
rifampicin	ARR-2	99.56	453 / 453	NZ_CP012566.1	83301..83753	Rifampicin resistance	HQ141279
rifampicin	ARR-3	99.39	490 / 543	NZ_CP014296.1	73677..74166	Rifampicin resistance	FM207631
rifampicin	ARR-3	100	453 / 453	NZ_CP014757.1	23467..23919	Rifampicin resistance	JF806499
rifampicin	ARR-6	99.78	453 / 453	NZ_CP012571.1	88264..88716	Rifampicin resistance	JF922883
fosfomycin	fosA3	100	417 / 417	NZ_CP021328.1	211670..212086	Fosfomycin resistance	AB522970
aminoglycoside	aac(3)-IIa	99.65	861 / 861	NZ_CP021880.1	117718..118578	Aminoglycoside resistance	AY138987
aminoglycoside	aac(3)-IIa	99.65	861 / 861	NZ_CP021880.1	117718..118578	Aminoglycoside resistance	FJ012882
aminoglycoside	aac(3)-IIa	99.77	861 / 861	NZ_CP017386.1	8796..9656	Aminoglycoside resistance	L22613
aminoglycoside	aac(3)-IIa	97.1	861 / 861	NZ_CP018982.1	69814..70674	Aminoglycoside resistance	X13543
aminoglycoside	aac(3)-IIa	99.77	861 / 861	NZ_CP020904.1	57405..58265	Aminoglycoside resistance	X51534
aminoglycoside	aac(3)-IIc	96.98	861 / 861	NZ_CP018999.1	137873..138733	Aminoglycoside resistance	X54723
aminoglycoside	aac(3)-IId	99.88	861 / 861	NZ_CP014498.1	201873..202733	Aminoglycoside resistance	EU022314
aminoglycoside	aac(3)-IIe	99.54	861 / 861	NZ_CP021937.1	83922..84782	Aminoglycoside resistance	EU022315
aminoglycoside	aac(6')-Ib	100	606 / 606	NC_009650.1	18835..19440	Aminoglycoside resistance	M21682
aminoglycoside	aac(6')-Ib	99.5	606 / 606	NZ_CP020904.1	67115..67720	Aminoglycoside resistance	M23634
aminoglycoside	aac(6')-Ib-Hangzhou	99.81	519 / 519	NZ_CP016763.1	115118..115636	Warning: gene is missing from Notes file. Please inform curator.	FJ503047
aminoglycoside	aac(6')-Ib-Suzhou	99.42	519 / 519	NZ_CP021538.1	39746..40264	Warning: gene is missing from Notes file. Please inform curator.	EU085533
aminoglycoside	aac(6')-Ib-cr	100	600 / 600	NZ_HG941719.1	104810..105409	Fluoroquinolone and aminoglycoside resistance	DQ303918
aminoglycoside	aac(6')-Ib-cr	99.81	519 / 519	NC_022651.1	33547..34065	Fluoroquinolone and aminoglycoside resistance	EF636461
aminoglycoside	aac(6')-Ib11	99.64	550 / 570	NZ_CP018815.1	64024..64573	Warning: gene is missing from Notes file. Please inform curator.	AY136758
aminoglycoside	aac(6')-Ib3	100	555 / 555	NZ_CP021328.1	183893..184447	Warning: gene is missing from Notes file. Please inform curator.	X60321
aminoglycoside	aac(6')-Il	100	459 / 459	NZ_CP011634.1	68553..69011	Aminoglycoside resistance	U13880
aminoglycoside	aadA1	96.97	792 / 792	NZ_CP021778.1	45018..45806	Aminoglycoside resistance	FJ591054
aminoglycoside	aadA1	100	792 / 792	NZ_CP016810.1	48915..49706	Aminoglycoside resistance	JQ414041
aminoglycoside	aadA1	100	789 / 789	NC_009650.1	19510..20298	Aminoglycoside resistance	JQ480156
aminoglycoside	aadA1	100	792 / 792	NZ_CP017935.1	60646..61437	Aminoglycoside resistance	JX185132
aminoglycoside	aadA1b	99.62	792 / 792	NZ_CP021741.1	64410..65201	Aminoglycoside resistance	M95287
aminoglycoside	aadA2	100	792 / 792	NZ_CP014005.1	53050..53841	Aminoglycoside resistance	JQ364967
aminoglycoside	aadA23	97.28	772 / 780	NZ_CP021900.1	49295..50063	Aminoglycoside resistance	AJ809407
aminoglycoside	aadA24	98.19	772 / 780	NZ_CP015387.1	116246..117014	Aminoglycoside resistance	DQ677333
aminoglycoside	aadA2b	99.74	780 / 780	NZ_CP017283.1	11312..12091	Warning: gene is missing from Notes file. Please inform curator.	D43625
aminoglycoside	aadA4	95.06	789 / 789	NZ_CP009860.1	70502..71290	Aminoglycoside resistance	Z50802
aminoglycoside	aadA5	100	789 / 789	NZ_HG941719.1	89585..90373	Aminoglycoside resistance	AF137361
aminoglycoside	aadA8b	96.96	790 / 792	NZ_CP017285.1	107033..107822	Aminoglycoside resistance	AM040708
aminoglycoside	aadA8b	96.71	790 / 792	NZ_CP021328.1	77253..78042	Aminoglycoside resistance	AY139603
aminoglycoside	ant(2'')-Ia	99.63	534 / 534	NZ_CP021733.1	63092..63625	Aminoglycoside resistance Alternate name; ant(2'')-Ia	AY920928
aminoglycoside	ant(2'')-Ia	99.81	534 / 534	NZ_CP020359.1	61335..61868	Aminoglycoside resistance Alternate name; ant(2'')-Ia	DQ018384
aminoglycoside	ant(2'')-Ia	99.81	534 / 534	NZ_CP020359.1	61335..61868	Aminoglycoside resistance Alternate name; ant(2'')-Ia	DQ266447
aminoglycoside	ant(2'')-Ia	99.81	534 / 534	NZ_CP020359.1	61335..61868	Aminoglycoside resistance Alternate name; ant(2'')-Ia	EF205594
aminoglycoside	ant(2'')-Ia	99.81	534 / 534	NZ_CP020359.1	61335..61868	Aminoglycoside resistance Alternate name; ant(2'')-Ia	HQ386848
aminoglycoside	ant(2'')-Ia	99.81	534 / 534	NZ_CP020359.1	61335..61868	Aminoglycoside resistance Alternate name; ant(2'')-Ia	HQ880250
aminoglycoside	ant(2'')-Ia	100	534 / 534	NC_009651.1	37667..38200	Aminoglycoside resistance Alternate name; ant(2'')-Ia	X04555
aminoglycoside	ant(2'')-Ia	99.81	534 / 534	NZ_CP020359.1	61335..61868	Aminoglycoside resistance Alternate name; ant(2'')-Ia	X74412
aminoglycoside	aph(3'')-Ib	100	803 / 804	NC_009651.1	12227..13029	Aminoglycoside resistance Alternate name; aph(3'')-Ib	AF024602
aminoglycoside	aph(3'')-Ib	99.88	804 / 804	NC_009651.1	12226..13029	Aminoglycoside resistance Alternate name; aph(3'')-Ib	AF313472
aminoglycoside	aph(3'')-Ib	99.88	804 / 804	NC_009651.1	12226..13029	Aminoglycoside resistance Alternate name; aph(3'')-Ib	AF321550
aminoglycoside	aph(3'')-Ib	100	804 / 804	NZ_CP008791.1	57381..58184	Aminoglycoside resistance Alternate name; aph(3'')-Ib	AF321551
aminoglycoside	aph(3'')-Ib	99.75	804 / 804	NZ_CP009773.1	53031..53834	Aminoglycoside resistance Alternate name; aph(3'')-Ib	M28829
aminoglycoside	aph(3')-Ia	99.75	816 / 816	NZ_CP017285.1	2159..2974	Aminoglycoside resistance	AF498082
aminoglycoside	aph(3')-Ia	99.39	816 / 816	NZ_CP023145.1	16320..17135	Aminoglycoside resistance	EU855787
aminoglycoside	aph(3')-Ia	99.26	816 / 816	NZ_CP023378.1	23220..24035	Aminoglycoside resistance	L05392
aminoglycoside	aph(3')-Ia	100	816 / 816	NZ_CP017283.1	15296..16111	Aminoglycoside resistance	V00359
aminoglycoside	aph(3')-Ia	100	816 / 816	NC_009651.1	27290..28105	Aminoglycoside resistance	X62115
aminoglycoside	aph(3')-VI	98.59	780 / 780	NZ_CP014757.1	9186..9965	Warning: gene is missing from Notes file. Please inform curator.	APPJ01000012
aminoglycoside	aph(3')-VI	100	780 / 780	NZ_CP009115.1	27075..27854	Warning: gene is missing from Notes file. Please inform curator.	KC170992
aminoglycoside	aph(3')-VIa	98.46	780 / 780	NZ_CP021941.1	20943..21722	Aminoglycoside resistance	X07753
aminoglycoside	aph(3')-VIb	97.06	579 / 780	NZ_CP021947.1	53486..54064	Aminoglycoside resistance	AJ627643
aminoglycoside	aph(3')-XV	100	795 / 795	NZ_CP016763.1	115707..116501	Aminoglycoside resistance	Y18050
aminoglycoside	aph(6)-Id	99.88	837 / 837	NZ_CP006926.1	52195..53031	Aminoglycoside resistance Alternate name; aph(6)-Id	18676889
aminoglycoside	aph(6)-Id	99.76	837 / 837	NZ_CP008932.1	54906..55742	Aminoglycoside resistance Alternate name; aph(6)-Id	AB109805
aminoglycoside	aph(6)-Id	99.88	837 / 837	NZ_CP006926.1	52195..53031	Aminoglycoside resistance Alternate name; aph(6)-Id	AF024602
aminoglycoside	aph(6)-Id	100	831 / 831	NZ_CP011135.1	55113..55943	Aminoglycoside resistance Alternate name; aph(6)-Id	CP000971
aminoglycoside	aph(6)-Id	100	837 / 837	NC_009651.1	13029..13865	Aminoglycoside resistance Alternate name; aph(6)-Id	M28829
aminoglycoside	armA	100	774 / 774	NZ_CP021328.1	373224..373997	Aminoglycoside resistance	AY220558
aminoglycoside	rmtB	100	756 / 756	NZ_CP018455.1	156424..157179	Aminoglycoside resistance	AB103506
aminoglycoside	rmtC	100	846 / 846	NC_021501.1	40059..40904	Aminoglycoside resistance	AB194779
