# Supplementary material for: Genetic determinants facilitating the evolution of resistance to carbapenem antibiotics
Source: eLife journal article supplement (doi:10.7554/elife.67310), 2021-04-19
Supplement: supp [file elife-67310-supp-v1.zip › elife_poa_e67310_Supplementary_file_8.xlsx]

## Sheet: Supplementary file 8
Supplementary file 8. ResFinder results of plasmids containing spacer24-hit gene.
Database	Resistance gene	Identity	Query / Template length	Contig	Position in contig	Predicted phenotype	Accession number
aminoglycoside	aac(3)-IIa	99.65	861 / 861	NZ_CP018460.1	13276..14136	Aminoglycoside resistance	AY138987
aminoglycoside	aac(3)-IIa	99.65	861 / 861	NZ_CP018460.1	13276..14136	Aminoglycoside resistance	FJ012882
aminoglycoside	aac(3)-IIa	96.52	861 / 861	NZ_CP015383.1	31074..31934	Aminoglycoside resistance	L22613
aminoglycoside	aac(3)-IIa	99.77	861 / 861	NZ_CP018365.1	259134..259994	Aminoglycoside resistance	X51534
aminoglycoside	aac(3)-IIc	96.63	861 / 861	NZ_CP018693.1	54334..55194	Aminoglycoside resistance	X54723
aminoglycoside	aac(3)-IId	99.88	861 / 861	NZ_CP017386.1	8796..9656	Aminoglycoside resistance	EU022314
aminoglycoside	aac(3)-IIe	99.54	861 / 861	NZ_CP018441.1	81147..82007	Aminoglycoside resistance	EU022315
aminoglycoside	aac(6')-Ib	100	606 / 606	NZ_CP011990.1	137063..137668	Aminoglycoside resistance	M21682
aminoglycoside	aac(6')-Ib	99.49	395 / 606	NZ_CP011977.1	32107..32501	Aminoglycoside resistance	M23634
aminoglycoside	aac(6')-Ib-Hangzhou	99.61	519 / 519	NZ_CP011839.1	69012..69530	Warning: gene is missing from Notes file. Please inform curator.	FJ503047
aminoglycoside	aac(6')-Ib-Suzhou	99.42	519 / 519	NZ_CP010574.1	141524..142042	Warning: gene is missing from Notes file. Please inform curator.	EU085533
aminoglycoside	aac(6')-Ib-cr	100	600 / 600	NZ_CP009879.1	35689..36288	Fluoroquinolone and aminoglycoside resistance	DQ303918
aminoglycoside	aac(6')-Ib-cr	100	519 / 519	NZ_CP012567.1	118283..118801	Fluoroquinolone and aminoglycoside resistance	EF636461
aminoglycoside	aac(6')-Ib3	99.82	555 / 555	NZ_CP011987.1	6728..7282	Warning: gene is missing from Notes file. Please inform curator.	X60321
aminoglycoside	aac(6')-Il	100	459 / 459	NZ_CP011634.1	68553..69011	Aminoglycoside resistance	U13880
aminoglycoside	aadA1	91.65	790 / 792	NZ_CP018355.1	157042..157831	Aminoglycoside resistance	FJ591054
aminoglycoside	aadA1	100	792 / 792	NZ_CP008800.1	56496..57287	Aminoglycoside resistance	JQ414041
aminoglycoside	aadA1	99.37	792 / 789	NZ_CP016810.1	48915..49706	Aminoglycoside resistance	JQ480156
aminoglycoside	aadA1	100	792 / 792	NZ_CP017935.1	60646..61437	Aminoglycoside resistance	JX185132
aminoglycoside	aadA11	92.05	792 / 792	NZ_CP021834.1	143418..144209	Aminoglycoside resistance	AJ567827
aminoglycoside	aadA12	94.82	792 / 792	NZ_CP018430.1	10764..11555	Aminoglycoside resistance	AY665771
aminoglycoside	aadA15	94.19	792 / 792	NZ_CP022692.1	85437..86228	Aminoglycoside resistance	DQ393783
aminoglycoside	aadA17	95.83	792 / 792	NZ_CP015823.1	76058..76849	Aminoglycoside resistance	FJ460181
aminoglycoside	aadA1b	99.62	792 / 792	NZ_CP021741.1	64410..65201	Aminoglycoside resistance	M95287
aminoglycoside	aadA2	100	792 / 792	NZ_CP007729.1	51964..52755	Aminoglycoside resistance	JQ364967
aminoglycoside	aadA2	99.88	802 / 819	NC_022078.1	71252..72053	Aminoglycoside resistance	NC_010870
aminoglycoside	aadA21	91.39	790 / 792	NZ_CP020072.1	45300..46089	Aminoglycoside resistance	AY171244
aminoglycoside	aadA22	92.02	777 / 792	NZ_CP021540.1	64573..65349	Aminoglycoside resistance	AM261837
aminoglycoside	aadA23	91.52	778 / 780	NZ_CP018365.1	249862..250639	Aminoglycoside resistance	AJ809407
aminoglycoside	aadA24	90.28	772 / 780	NZ_CP020838.1	31968..32739	Aminoglycoside resistance	AM711129
aminoglycoside	aadA24	98.7	772 / 780	NZ_CP018460.1	32460..33231	Aminoglycoside resistance	DQ677333
aminoglycoside	aadA2b	99.87	780 / 780	NZ_CP008800.1	54103..54882	Warning: gene is missing from Notes file. Please inform curator.	D43625
aminoglycoside	aadA3	98.73	790 / 792	NZ_CP010393.1	10083..10872	Aminoglycoside resistance	AF047479
aminoglycoside	aadA8	96.2	790 / 792	NZ_CP014005.1	53050..53839	Aminoglycoside resistance	AF326210
aminoglycoside	aadA8b	96.96	790 / 792	NZ_CP011990.1	96928..97717	Aminoglycoside resistance	AM040708
aminoglycoside	aadA8b	96.71	790 / 792	NZ_CP009777.1	2562..3351	Aminoglycoside resistance	AY139603
aminoglycoside	ant(2'')-Ia	100	534 / 534	NZ_CP020359.1	61335..61868	Aminoglycoside resistance Alternate name; ant(2'')-Ia	X04555
aminoglycoside	aph(3'')-Ib	100	803 / 804	NZ_CP008932.1	55742..56544	Aminoglycoside resistance Alternate name; aph(3'')-Ib	AF024602
aminoglycoside	aph(3'')-Ib	99.88	804 / 804	NZ_CP008932.1	55742..56545	Aminoglycoside resistance Alternate name; aph(3'')-Ib	AF313472
aminoglycoside	aph(3'')-Ib	99.88	804 / 804	NZ_CP008932.1	55742..56545	Aminoglycoside resistance Alternate name; aph(3'')-Ib	AF321550
aminoglycoside	aph(3'')-Ib	100	804 / 804	NZ_CP012988.3	109298..110101	Aminoglycoside resistance Alternate name; aph(3'')-Ib	AF321551
aminoglycoside	aph(3'')-Ib	99.75	804 / 804	NZ_CP012993.2	109298..110101	Aminoglycoside resistance Alternate name; aph(3'')-Ib	M28829
aminoglycoside	aph(3')-Ia	99.75	816 / 816	NZ_CP008829.1	61292..62107	Aminoglycoside resistance	AF498082
aminoglycoside	aph(3')-Ia	98.53	814 / 816	NZ_CP015823.1	66708..67521	Aminoglycoside resistance	AP004237
aminoglycoside	aph(3')-Ia	99.14	814 / 816	NZ_CP010393.1	19411..20224	Aminoglycoside resistance	EF015636
aminoglycoside	aph(3')-Ia	97.43	816 / 816	NZ_CP018430.1	20092..20907	Aminoglycoside resistance	EU287476
aminoglycoside	aph(3')-Ia	99.14	814 / 816	NZ_CP010393.1	19411..20224	Aminoglycoside resistance	EU722351
aminoglycoside	aph(3')-Ia	99.39	816 / 816	NZ_CP011977.1	25354..26169	Aminoglycoside resistance	EU855787
aminoglycoside	aph(3')-Ia	99.26	816 / 816	NC_022078.1	155276..156091	Aminoglycoside resistance	L05392
aminoglycoside	aph(3')-Ia	100	816 / 816	NZ_CP007729.1	61292..62107	Aminoglycoside resistance	V00359
aminoglycoside	aph(3')-Ia	99.39	814 / 816	NZ_CP009777.1	13217..14030	Aminoglycoside resistance	X62115
aminoglycoside	aph(3')-Ia	99.26	814 / 816	NZ_CP010574.1	3725..4538	Aminoglycoside resistance	Y00452
aminoglycoside	aph(6)-Id	99.88	837 / 837	NZ_CP012988.3	108462..109298	Aminoglycoside resistance Alternate name; aph(6)-Id	18676889
aminoglycoside	aph(6)-Id	99.76	837 / 837	NZ_CP016925.1	19657..20493	Aminoglycoside resistance Alternate name; aph(6)-Id	AB109805
aminoglycoside	aph(6)-Id	99.88	837 / 837	NZ_CP012988.3	108462..109298	Aminoglycoside resistance Alternate name; aph(6)-Id	AF024602
aminoglycoside	aph(6)-Id	100	831 / 831	NZ_CP016810.1	73752..74582	Aminoglycoside resistance Alternate name; aph(6)-Id	CP000971
aminoglycoside	aph(6)-Id	100	837 / 837	NZ_CP008932.1	54906..55742	Aminoglycoside resistance Alternate name; aph(6)-Id	M28829
aminoglycoside	armA	100	774 / 774	NZ_CP012428.1	38296..39069	Aminoglycoside resistance	AY220558
aminoglycoside	rmtB	100	756 / 756	NC_022078.1	142623..143378	Aminoglycoside resistance	AB103506
aminoglycoside	rmtF	100	780 / 780	NZ_CP020842.1	96786..97565	Aminoglycoside resistance	JQ808129
tetracycline	tet(A)	100	1247 / 1275	NZ_CP016925.1	47053..48299	Tetracycline resistance	AF534183
tetracycline	tet(A)	99.83	1200 / 1200	NC_022078.1	77552..78751	Tetracycline resistance	AJ313332
tetracycline	tet(A)	99.75	1200 / 1200	NZ_CP009879.1	38232..39431	Tetracycline resistance	AJ419171
tetracycline	tet(A)	100	1200 / 1200	NZ_CP006663.1	19168..20367	Tetracycline resistance	AJ517790
tetracycline	tet(A)	99.42	1200 / 1200	NZ_CP012988.3	80731..81930	Tetracycline resistance	AY196695
tetracycline	tet(A)	99.17	1201 / 1200	NZ_CP012993.2	80731..81930	Tetracycline resistance	X00006
tetracycline	tet(D)	100	1185 / 1185	NZ_CP008930.1	38853..40037	Tetracycline resistance	AF467077
tetracycline	tet(D)	99.83	1185 / 1185	NZ_CP017386.1	19982..21166	Tetracycline resistance	X65876
tetracycline	tet(G)	100	1176 / 1176	NC_022078.1	147083..148258	Tetracycline resistance	AF133140
phenicol	catA1	99.85	660 / 660	NZ_CP007729.1	44389..45048	Phenicol resistance	V00622
phenicol	catA2	96.11	642 / 642	NZ_CP021688.1	44494..45135	Phenicol resistance	X53796
phenicol	catB3	100	442 / 633	NZ_CP012567.1	119900..120341	Phenicol resistance	AJ009818
phenicol	catB3	100	442 / 633	NZ_CP012567.1	119900..120341	Phenicol resistance	U13880
phenicol	cmlA1	99.92	1260 / 1260	NZ_CP008800.1	55144..56403	Phenicol resistance	M64556
phenicol	floR	98.19	1214 / 1215	NZ_CP021946.1	87969..89182	Phenicol resistance	AF118107
beta-lactam	blaCTX-M-101	99.89	876 / 876	NZ_CP012993.2	103184..104059	Beta-lactam resistance	HQ398214
beta-lactam	blaCTX-M-103	99.89	876 / 876	NZ_CP012993.2	103184..104059	Beta-lactam resistance	HG423149
beta-lactam	blaCTX-M-114	99.77	876 / 876	NZ_CP014005.1	47694..48569	Beta-lactam resistance	GQ351346
beta-lactam	blaCTX-M-116	99.32	876 / 876	NZ_CP018460.1	19290..20165	Beta-lactam resistance	JF966749
beta-lactam	blaCTX-M-117	99.89	876 / 876	NZ_CP012993.2	103184..104059	Beta-lactam resistance	JN227085
beta-lactam	blaCTX-M-12	98.97	876 / 876	NZ_CP021688.1	52265..53140	Beta-lactam resistance	DQ821704
beta-lactam	blaCTX-M-122	99.89	876 / 876	NC_022078.1	127469..128344	Beta-lactam resistance	JN790863
beta-lactam	blaCTX-M-125	99.89	876 / 876	NC_022078.1	127469..128344	Beta-lactam resistance	JQ724542
beta-lactam	blaCTX-M-127	99.89	876 / 876	NZ_CP012993.2	103184..104059	Beta-lactam resistance	MF196229
beta-lactam	blaCTX-M-136	99.54	876 / 876	NZ_CP011839.1	58138..59013	Beta-lactam resistance	KC351754
beta-lactam	blaCTX-M-139	99.89	876 / 876	NZ_CP012993.2	103184..104059	Beta-lactam resistance	KC107824
beta-lactam	blaCTX-M-14	99.89	876 / 876	NC_022078.1	127469..128344	Beta-lactam resistance Amino acid sequences of CTX-M-14 and CTX-M-18 are identical	AF252622
beta-lactam	blaCTX-M-142	99.89	876 / 876	NZ_CP012993.2	103184..104059	Beta-lactam resistance	KF240809
beta-lactam	blaCTX-M-144	99.77	876 / 876	NZ_CP014005.1	47694..48569	Beta-lactam resistance	KJ020573
beta-lactam	blaCTX-M-15	100	876 / 876	NZ_CP012988.3	103184..104059	Beta-lactam resistance Alternate name; UOE-1	AY044436
beta-lactam	blaCTX-M-150	99.54	876 / 876	NZ_CP011839.1	58138..59013	Warning: gene is missing from Notes file. Please inform curator.	KF769131
beta-lactam	blaCTX-M-155	99.54	876 / 876	NZ_CP011839.1	58138..59013	Warning: gene is missing from Notes file. Please inform curator.	KM211508
beta-lactam	blaCTX-M-156	99.89	876 / 876	NZ_CP012993.2	103184..104059	Warning: gene is missing from Notes file. Please inform curator.	KM211509
beta-lactam	blaCTX-M-157	99.89	876 / 876	NZ_CP012993.2	103184..104059	Warning: gene is missing from Notes file. Please inform curator.	KM211510
beta-lactam	blaCTX-M-162	99.77	876 / 876	NZ_CP014005.1	47694..48569	Warning: gene is missing from Notes file. Please inform curator.	KP681697
beta-lactam	blaCTX-M-163	99.89	876 / 876	NZ_CP012993.2	103184..104059	Warning: gene is missing from Notes file. Please inform curator.	KP681698
beta-lactam	blaCTX-M-164	99.77	876 / 876	NZ_CP014005.1	47694..48569	Warning: gene is missing from Notes file. Please inform curator.	KP727571
beta-lactam	blaCTX-M-167	99.77	876 / 876	NZ_CP014005.1	47694..48569	Warning: gene is missing from Notes file. Please inform curator.	KR537428
beta-lactam	blaCTX-M-169	98.86	876 / 876	NZ_CP021698.1	34505..35380	Warning: gene is missing from Notes file. Please inform curator.	KR779864
beta-lactam	blaCTX-M-170	99.89	876 / 876	NZ_CP012993.2	103184..104059	Warning: gene is missing from Notes file. Please inform curator.	KR822223
beta-lactam	blaCTX-M-172	99.89	876 / 876	NZ_CP012993.2	103184..104059	Warning: gene is missing from Notes file. Please inform curator.	KT251041
beta-lactam	blaCTX-M-173	99.89	876 / 876	NZ_CP012993.2	103184..104059	Warning: gene is missing from Notes file. Please inform curator.	KT997884
beta-lactam	blaCTX-M-176	99.89	876 / 876	NZ_CP012993.2	103184..104059	Warning: gene is missing from Notes file. Please inform curator.	KT997888
beta-lactam	blaCTX-M-177	99.43	876 / 876	NZ_CP018365.1	4374..5249	Warning: gene is missing from Notes file. Please inform curator.	KT997889
beta-lactam	blaCTX-M-179	99.77	876 / 876	NZ_CP014005.1	47694..48569	Warning: gene is missing from Notes file. Please inform curator.	KU705393
beta-lactam	blaCTX-M-180	99.89	876 / 876	NZ_CP012993.2	103184..104059	Warning: gene is missing from Notes file. Please inform curator.	KX056899
beta-lactam	blaCTX-M-181	99.89	876 / 876	NZ_CP012993.2	103184..104059	Warning: gene is missing from Notes file. Please inform curator.	KX056900
beta-lactam	blaCTX-M-182	99.89	876 / 876	NZ_CP012993.2	103184..104059	Warning: gene is missing from Notes file. Please inform curator.	KX056901
beta-lactam	blaCTX-M-183	99.89	876 / 876	NZ_CP012993.2	103184..104059	Warning: gene is missing from Notes file. Please inform curator.	KX263246
beta-lactam	blaCTX-M-184	99.89	876 / 876	NZ_CP012993.2	103184..104059	Warning: gene is missing from Notes file. Please inform curator.	KX263247
beta-lactam	blaCTX-M-186	99.89	876 / 876	NZ_CP012993.2	103184..104059	Warning: gene is missing from Notes file. Please inform curator.	KX446939
beta-lactam	blaCTX-M-188	99.89	876 / 876	NZ_CP012993.2	103184..104059	Warning: gene is missing from Notes file. Please inform curator.	KX676491
beta-lactam	blaCTX-M-189	99.89	876 / 876	NZ_CP012993.2	103184..104059	Warning: gene is missing from Notes file. Please inform curator.	FJ657512
beta-lactam	blaCTX-M-190	99.77	876 / 876	NZ_CP014005.1	47694..48569	Warning: gene is missing from Notes file. Please inform curator.	KX664469
beta-lactam	blaCTX-M-193	99.89	876 / 876	NZ_CP012993.2	103184..104059	Warning: gene is missing from Notes file. Please inform curator.	KY563766
beta-lactam	blaCTX-M-194	99.89	876 / 876	NZ_CP012993.2	103184..104059	Warning: gene is missing from Notes file. Please inform curator.	KY563767
beta-lactam	blaCTX-M-196	99.89	876 / 876	NC_022078.1	127469..128344	Warning: gene is missing from Notes file. Please inform curator.	KY563769
beta-lactam	blaCTX-M-197	99.89	876 / 876	NZ_CP012993.2	103184..104059	Warning: gene is missing from Notes file. Please inform curator.	KY646303
beta-lactam	blaCTX-M-202	99.89	876 / 876	NZ_CP012993.2	103184..104059	Warning: gene is missing from Notes file. Please inform curator.	MF195067
beta-lactam	blaCTX-M-203	99.77	876 / 876	NZ_CP014005.1	47694..48569	Warning: gene is missing from Notes file. Please inform curator.	MF196230
beta-lactam	blaCTX-M-204	99.77	876 / 876	NZ_CP014005.1	47694..48569	Warning: gene is missing from Notes file. Please inform curator.	MF281085
beta-lactam	blaCTX-M-206	99.2	876 / 876	NZ_CP018441.1	75118..75993	Warning: gene is missing from Notes file. Please inform curator.	KJ802520
beta-lactam	blaCTX-M-207	99.77	876 / 876	NZ_CP014005.1	47694..48569	Warning: gene is missing from Notes file. Please inform curator.	LC348384
beta-lactam	blaCTX-M-208	99.89	876 / 876	NZ_CP012993.2	103184..104059	Warning: gene is missing from Notes file. Please inform curator.	MH067958
beta-lactam	blaCTX-M-209	99.89	876 / 876	NZ_CP012993.2	103184..104059	Warning: gene is missing from Notes file. Please inform curator.	MH067959
beta-lactam	blaCTX-M-210	99.89	876 / 876	NZ_CP012993.2	103184..104059	Warning: gene is missing from Notes file. Please inform curator.	MH067960
beta-lactam	blaCTX-M-212	99.32	876 / 876	NZ_CP018460.1	19290..20165	Warning: gene is missing from Notes file. Please inform curator.	MH067962
beta-lactam	blaCTX-M-216	99.89	876 / 876	NZ_CP012993.2	103184..104059	Warning: gene is missing from Notes file. Please inform curator.	MH243352
beta-lactam	blaCTX-M-218	99.89	876 / 876	NZ_CP012993.2	103184..104059	Warning: gene is missing from Notes file. Please inform curator.	MH243358
beta-lactam	blaCTX-M-22	99.77	876 / 876	NZ_CP014005.1	47694..48569	Beta-lactam resistance	AY080894
beta-lactam	blaCTX-M-220	99.77	876 / 876	NZ_CP014005.1	47694..48569	Warning: gene is missing from Notes file. Please inform curator.	MH450163
beta-lactam	blaCTX-M-23	98.86	876 / 876	NZ_CP021698.1	34505..35380	Beta-lactam resistance	AF488377
beta-lactam	blaCTX-M-28	99.77	876 / 876	NZ_CP014005.1	47694..48569	Beta-lactam resistance	AJ549244
beta-lactam	blaCTX-M-29	99.2	876 / 876	NZ_CP018441.1	75118..75993	Beta-lactam resistance	AY267213
beta-lactam	blaCTX-M-3	99.89	876 / 876	NZ_CP012993.2	103184..104059	Beta-lactam resistance Amino acid sequences of CTX-M-3 and CTX-M-133 are identical	Y10278
beta-lactam	blaCTX-M-32	98.86	876 / 876	NZ_CP021698.1	34505..35380	Beta-lactam resistance	AJ557142
beta-lactam	blaCTX-M-33	99.89	876 / 876	NZ_CP012993.2	103184..104059	Beta-lactam resistance	AY238472
beta-lactam	blaCTX-M-36	98.86	876 / 876	NZ_CP021698.1	34505..35380	Beta-lactam resistance	AB177384
beta-lactam	blaCTX-M-42	99.77	876 / 876	NZ_CP014005.1	47694..48569	Beta-lactam resistance	DQ061159
beta-lactam	blaCTX-M-52	99.66	876 / 876	NZ_CP016925.1	24896..25771	Beta-lactam resistance	DQ223685
beta-lactam	blaCTX-M-54	99.77	876 / 876	NZ_CP014005.1	47694..48569	Beta-lactam resistance	DQ303459
beta-lactam	blaCTX-M-55	99.89	876 / 876	NZ_CP012993.2	103184..104059	Beta-lactam resistance Amino acid sequences of CTX-M-55 and CTX-M-57 are identical	DQ810789
beta-lactam	blaCTX-M-60	98.86	876 / 876	NZ_CP021698.1	34505..35380	Beta-lactam resistance	AM411407
beta-lactam	blaCTX-M-61	98.86	876 / 876	NZ_CP021698.1	34505..35380	Beta-lactam resistance	EF219142
beta-lactam	blaCTX-M-62	98.86	876 / 876	NZ_CP021698.1	34505..35380	Beta-lactam resistance	EF219134
beta-lactam	blaCTX-M-65	99.89	876 / 876	NC_022078.1	127469..128344	Beta-lactam resistance	EF418608
beta-lactam	blaCTX-M-66	99.77	876 / 876	NZ_CP014005.1	47694..48569	Beta-lactam resistance	EF576988
beta-lactam	blaCTX-M-69	99.66	876 / 876	NZ_CP016925.1	24896..25771	Beta-lactam resistance	EU402393
beta-lactam	blaCTX-M-71	99.89	876 / 876	NZ_CP012993.2	103184..104059	Beta-lactam resistance	FJ815436
beta-lactam	blaCTX-M-72	99.77	876 / 876	NZ_CP014005.1	47694..48569	Beta-lactam resistance	AY847148
beta-lactam	blaCTX-M-79	99.77	876 / 876	NZ_CP014005.1	47694..48569	Beta-lactam resistance	EF426798
beta-lactam	blaCTX-M-80	99.66	876 / 876	NZ_CP016925.1	24896..25771	Beta-lactam resistance	EU202673
beta-lactam	blaCTX-M-82	99.89	876 / 876	NZ_CP012993.2	103184..104059	Beta-lactam resistance	DQ256091
beta-lactam	blaCTX-M-88	99.89	876 / 876	NZ_CP012993.2	103184..104059	Beta-lactam resistance	FJ873739
beta-lactam	blaCTX-M-96	99.09	876 / 876	NZ_CP018693.1	60348..61223	Beta-lactam resistance	AJ704396
beta-lactam	blaCTX-M-99	99.89	876 / 876	NC_022078.1	127469..128344	Beta-lactam resistance	HM803271
beta-lactam	blaKPC-10	99.89	882 / 882	NZ_CP014765.1	15984..16865	Beta-lactam resistance	GQ140348
beta-lactam	blaKPC-11	99.89	882 / 882	NC_022078.1	116171..117052	Beta-lactam resistance	HM066995
beta-lactam	blaKPC-12	99.89	882 / 882	NC_022078.1	116171..117052	Beta-lactam resistance	HQ641422
beta-lactam	blaKPC-13	99.66	882 / 882	NZ_CP022349.1	23815..24696	Beta-lactam resistance	HQ342889
beta-lactam	blaKPC-16	99.66	882 / 882	NZ_CP022574.1	9419..10300	Beta-lactam resistance	KC465199
beta-lactam	blaKPC-17	99.89	882 / 882	NC_022078.1	116171..117052	Warning: gene is missing from Notes file. Please inform curator.	KC465200
beta-lactam	blaKPC-18	99.89	882 / 882	NC_022078.1	116171..117052	Warning: gene is missing from Notes file. Please inform curator.	KT884517
beta-lactam	blaKPC-19	99.77	882 / 882	NZ_CP020359.1	37410..38291	Warning: gene is missing from Notes file. Please inform curator.	KJ775801
beta-lactam	blaKPC-2	100	882 / 882	NZ_CP011981.1	12173..13054	Beta-lactam resistance	AY034847
beta-lactam	blaKPC-21	99.89	882 / 882	NC_022078.1	116171..117052	Warning: gene is missing from Notes file. Please inform curator.	LN609376
beta-lactam	blaKPC-22	99.77	882 / 882	NZ_CP022275.1	79556..80437	Warning: gene is missing from Notes file. Please inform curator.	KM379100
beta-lactam	blaKPC-23	99.89	882 / 882	NZ_CP014765.1	15984..16865	Warning: gene is missing from Notes file. Please inform curator.	MH450213
beta-lactam	blaKPC-24	99.89	882 / 882	NC_022078.1	116171..117052	Warning: gene is missing from Notes file. Please inform curator.	KR052099
beta-lactam	blaKPC-26	99.89	882 / 882	NC_022078.1	116171..117052	Warning: gene is missing from Notes file. Please inform curator.	KX619622
beta-lactam	blaKPC-27	99.89	882 / 882	NZ_CP014765.1	15984..16865	Warning: gene is missing from Notes file. Please inform curator.	KX828722
beta-lactam	blaKPC-3	100	882 / 882	NZ_CP011646.1	37351..38232	Beta-lactam resistance	HM769262
beta-lactam	blaKPC-30	99.89	882 / 882	NC_022078.1	116171..117052	Warning: gene is missing from Notes file. Please inform curator.	KY646302
beta-lactam	blaKPC-31	99.89	882 / 882	NZ_CP014765.1	15984..16865	Warning: gene is missing from Notes file. Please inform curator.	MAPH01000113
beta-lactam	blaKPC-32	99.66	882 / 882	NZ_CP022349.1	23815..24696	Warning: gene is missing from Notes file. Please inform curator.	MAPO01000050
beta-lactam	blaKPC-33	99.89	882 / 882	NC_022078.1	116171..117052	Warning: gene is missing from Notes file. Please inform curator.	CP025144
beta-lactam	blaKPC-34	100	825 / 906	NZ_CP023186.1	40861..41685	Warning: gene is missing from Notes file. Please inform curator.	KU985429
beta-lactam	blaKPC-35	99.89	882 / 882	NC_022078.1	116171..117052	Warning: gene is missing from Notes file. Please inform curator.	MH404098
beta-lactam	blaKPC-4	99.77	882 / 882	NZ_CP022275.1	79556..80437	Beta-lactam resistance	FJ473382
beta-lactam	blaKPC-5	99.89	882 / 882	NC_022078.1	116171..117052	Beta-lactam resistance	EU400222
beta-lactam	blaKPC-6	99.89	882 / 882	NC_022078.1	116171..117052	Beta-lactam resistance	EU555534
beta-lactam	blaKPC-7	99.89	882 / 882	NZ_CP014765.1	15984..16865	Beta-lactam resistance	EU729727
beta-lactam	blaKPC-8	99.89	882 / 882	NZ_CP014765.1	15984..16865	Beta-lactam resistance	FJ234412
beta-lactam	blaKPC-9	99.88	854 / 854	NZ_CP014669.1	15997..16850	Beta-lactam resistance	FJ624872
beta-lactam	blaNDM-1	100	813 / 813	NZ_CP011839.1	54141..54953	Beta-lactam resistance	FN396876
beta-lactam	blaNDM-11	99.88	813 / 813	NZ_CP021720.1	33816..34628	Beta-lactam resistance	KP265939
beta-lactam	blaNDM-14	99.88	813 / 813	NZ_CP021720.1	33816..34628	Beta-lactam resistance	KM210086
beta-lactam	blaNDM-16	99.88	813 / 813	NZ_CP021720.1	33816..34628	Beta-lactam resistance	KP862821
beta-lactam	blaNDM-2	99.88	813 / 813	NZ_CP021720.1	33816..34628	Beta-lactam resistance	JF703135
beta-lactam	blaNDM-22	99.88	813 / 813	NZ_CP021720.1	33816..34628	Warning: gene is missing from Notes file. Please inform curator.	MH243357
beta-lactam	blaNDM-23	99.88	813 / 813	NZ_CP021720.1	33816..34628	Warning: gene is missing from Notes file. Please inform curator.	MH450214
beta-lactam	blaNDM-24	99.88	813 / 813	NZ_CP021720.1	33816..34628	Warning: gene is missing from Notes file. Please inform curator.	MH450215
beta-lactam	blaNDM-3	99.88	813 / 813	NZ_CP021720.1	33816..34628	Beta-lactam resistance	JQ734687
beta-lactam	blaNDM-4	99.88	813 / 813	NZ_CP021720.1	33816..34628	Beta-lactam resistance	JQ348841
beta-lactam	blaNDM-6	99.88	813 / 813	NZ_CP021720.1	33816..34628	Beta-lactam resistance	JN967644
beta-lactam	blaNDM-9	99.88	813 / 813	NZ_CP021720.1	33816..34628	Beta-lactam resistance	KC999080
beta-lactam	blaOXA-1	100	831 / 831	NZ_CP009879.1	34728..35558	Beta-lactam resistance	HQ170510
beta-lactam	blaOXA-2	100	828 / 828	NZ_CP011634.1	69154..69981	Beta-lactam resistance	DQ112222
beta-lactam	blaOXA-224	99.64	831 / 831	NZ_CP018460.1	11003..11833	Beta-lactam resistance	JN412067
beta-lactam	blaOXA-31	99.64	831 / 831	NZ_CP018460.1	11003..11833	Beta-lactam resistance	AF294653
beta-lactam	blaOXA-320	99.88	831 / 831	NZ_CP012567.1	118932..119762	Beta-lactam resistance	KF151169
beta-lactam	blaOXA-392	97.95	831 / 831	NZ_CP018441.1	83450..84280	Warning: gene is missing from Notes file. Please inform curator.	AB901044
beta-lactam	blaOXA-4	99.76	831 / 831	NZ_CP018365.1	49821..50651	Beta-lactam resistance	AY162283
beta-lactam	blaOXA-47	97.83	831 / 831	NZ_CP018693.1	52061..52891	Beta-lactam resistance	AY237830
beta-lactam	blaOXA-534	99.88	831 / 831	NZ_CP012567.1	118932..119762	Warning: gene is missing from Notes file. Please inform curator.	KX714285
beta-lactam	blaOXA-9	99.88	825 / 825	NZ_CP022574.1	166331..167155	Beta-lactam resistance	KQ089875
beta-lactam	blaSFO-1	100	888 / 888	NZ_CP012428.1	4802..5689	Beta-lactam resistance	AB003148
beta-lactam	blaSHV-1	100	861 / 861	NZ_CP015132.1	190691..191551	Beta-lactam resistance	AF148850
beta-lactam	blaSHV-11	99.65	861 / 861	NZ_CP021545.1	53409..54269	Beta-lactam resistance Alternate name; SHV-1-2a	X98101
beta-lactam	blaSHV-12	100	861 / 861	NZ_CP011977.1	33484..34344	Beta-lactam resistance Alternate name; SHV-5-2a	KF976405
beta-lactam	blaSHV-120	99.54	861 / 861	NZ_CP021857.1	24824..25684	Beta-lactam resistance	JF812965
beta-lactam	blaSHV-129	99.65	861 / 861	NZ_CP021545.1	53409..54269	Beta-lactam resistance	GU827715
beta-lactam	blaSHV-13	99.65	861 / 861	NZ_CP021545.1	53409..54269	Beta-lactam resistance	AF164577
beta-lactam	blaSHV-134	99.88	861 / 861	NZ_CP011987.1	37160..38020	Beta-lactam resistance	HM559945
beta-lactam	blaSHV-15	99.77	861 / 861	NZ_CP011646.1	91050..91910	Beta-lactam resistance	AJ011428
beta-lactam	blaSHV-160	99.88	861 / 861	NZ_CP011987.1	37160..38020	Beta-lactam resistance	JX121127
beta-lactam	blaSHV-172	99.54	861 / 861	NZ_CP021857.1	24824..25684	Beta-lactam resistance	KF513177
beta-lactam	blaSHV-2	99.54	861 / 861	NZ_CP021857.1	24824..25684	Beta-lactam resistance	AF148851
beta-lactam	blaSHV-200	99.54	861 / 861	NZ_CP021857.1	24824..25684	Warning: gene is missing from Notes file. Please inform curator.	MF871643
beta-lactam	blaSHV-203	99.54	861 / 861	NZ_CP021857.1	24824..25684	Warning: gene is missing from Notes file. Please inform curator.	MG028656
beta-lactam	blaSHV-2a	99.65	861 / 861	NZ_CP021545.1	53409..54269	Beta-lactam resistance	X98102
beta-lactam	blaSHV-31	99.65	861 / 861	NZ_CP021545.1	53409..54269	Beta-lactam resistance	AY277255
beta-lactam	blaSHV-5	100	861 / 861	NZ_CP021541.1	90528..91388	Beta-lactam resistance	X55640
beta-lactam	blaSHV-60	99.54	861 / 861	NZ_CP021857.1	24824..25684	Beta-lactam resistance	AB302939
beta-lactam	blaSHV-61	99.54	861 / 861	NZ_CP021857.1	24824..25684	Beta-lactam resistance	AJ866284
beta-lactam	blaSHV-64	99.77	861 / 861	NZ_CP011646.1	91050..91910	Beta-lactam resistance	DQ174304
beta-lactam	blaSHV-66	99.88	861 / 861	NZ_CP011987.1	37160..38020	Beta-lactam resistance	DQ174306
beta-lactam	blaSHV-70	99.65	861 / 861	NZ_CP021545.1	53409..54269	Beta-lactam resistance	DQ013287
beta-lactam	blaSHV-86	99.77	861 / 861	NZ_CP011646.1	91050..91910	Beta-lactam resistance	DQ328802
beta-lactam	blaTEM-10	99.77	861 / 861	NZ_CP012988.3	106881..107741	Beta-lactam resistance Alternate name; MGH-1, blaTEM-23, blaTEM-E3	AF093512
beta-lactam	blaTEM-104	99.77	861 / 861	NZ_CP012988.3	106881..107741	Beta-lactam resistance	AF516719
beta-lactam	blaTEM-105	99.88	861 / 861	NZ_CP011634.1	179195..180055	Beta-lactam resistance	AF516720
beta-lactam	blaTEM-106	99.77	861 / 861	NZ_CP012988.3	106881..107741	Beta-lactam resistance	AY101578
beta-lactam	blaTEM-107	99.54	861 / 861	NZ_CP016925.1	21214..22074	Beta-lactam resistance	AY101764
beta-lactam	blaTEM-109	99.54	861 / 861	NZ_CP016925.1	21214..22074	Beta-lactam resistance Alternate name; CMT-5	AY628175
beta-lactam	blaTEM-112	99.42	861 / 861	NZ_CP011839.1	75018..75878	Beta-lactam resistance	AY589493
beta-lactam	blaTEM-115	99.3	861 / 861	NZ_CP018460.1	22987..23847	Beta-lactam resistance	AF535127
beta-lactam	blaTEM-116	99.42	861 / 861	NZ_CP011839.1	75018..75878	Beta-lactam resistance	AY425988
beta-lactam	blaTEM-12	99.3	861 / 861	NZ_CP018460.1	22987..23847	Beta-lactam resistance Alternate name; YOU-2, CAZ-3, blaTEM-E2	M88143
beta-lactam	blaTEM-120	99.3	861 / 861	NZ_CP018460.1	22987..23847	Beta-lactam resistance	AY243512
beta-lactam	blaTEM-122	99.77	861 / 861	NZ_CP012988.3	106881..107741	Beta-lactam resistance	AY307100
beta-lactam	blaTEM-126	99.77	861 / 861	NZ_CP012988.3	106881..107741	Beta-lactam resistance	AY628199
beta-lactam	blaTEM-127	99.88	861 / 861	NZ_CP011634.1	179195..180055	Beta-lactam resistance	AY368236
beta-lactam	blaTEM-128	99.88	861 / 861	NZ_CP011634.1	179195..180055	Beta-lactam resistance	AY368237
beta-lactam	blaTEM-132	99.65	861 / 861	NZ_CP012993.2	106881..107741	Beta-lactam resistance	AY491682
beta-lactam	blaTEM-135	99.77	861 / 861	NZ_CP012988.3	106881..107741	Beta-lactam resistance	GQ896333
beta-lactam	blaTEM-136	99.42	861 / 861	NZ_CP011839.1	75018..75878	Beta-lactam resistance	AY826417
beta-lactam	blaTEM-141	99.77	861 / 861	NZ_CP012988.3	106881..107741	Beta-lactam resistance	AY956335
beta-lactam	blaTEM-143	99.88	861 / 861	NZ_CP011634.1	179195..180055	Beta-lactam resistance	DQ075245
beta-lactam	blaTEM-144	99.77	861 / 861	NZ_CP012988.3	106881..107741	Beta-lactam resistance	AM049400
beta-lactam	blaTEM-145	99.42	861 / 861	NZ_CP011839.1	75018..75878	Beta-lactam resistance	DQ105528
beta-lactam	blaTEM-146	99.42	861 / 861	NZ_CP011839.1	75018..75878	Beta-lactam resistance	DQ105529
beta-lactam	blaTEM-147	99.65	861 / 861	NZ_CP012993.2	106881..107741	Beta-lactam resistance	DQ279850
beta-lactam	blaTEM-148	99.88	861 / 861	NZ_CP011634.1	179195..180055	Beta-lactam resistance	AM087454
beta-lactam	blaTEM-15	99.77	861 / 861	NZ_CP012988.3	106881..107741	Beta-lactam resistance	AM849805
beta-lactam	blaTEM-150	99.77	861 / 861	NZ_CP022574.1	167855..168715	Beta-lactam resistance	AM183304
beta-lactam	blaTEM-153	99.42	861 / 861	NZ_CP011839.1	75018..75878	Beta-lactam resistance	KC149518
beta-lactam	blaTEM-154	99.42	861 / 861	NZ_CP011839.1	75018..75878	Beta-lactam resistance Alternate name; CTM-type	FJ807656
beta-lactam	blaTEM-155	99.3	861 / 861	NZ_CP018460.1	22987..23847	Beta-lactam resistance	DQ679961
beta-lactam	blaTEM-156	99.77	861 / 861	NZ_CP022574.1	167855..168715	Beta-lactam resistance	AM941159
beta-lactam	blaTEM-158	99.65	861 / 861	NZ_CP012993.2	106881..107741	Beta-lactam resistance Alternate name; CTM-9	EF534736
beta-lactam	blaTEM-163	99.65	861 / 861	NZ_CP012993.2	106881..107741	Beta-lactam resistance	EU815939
beta-lactam	blaTEM-164	99.77	861 / 861	NZ_CP012988.3	106881..107741	Beta-lactam resistance	EU274580
beta-lactam	blaTEM-166	99.88	861 / 861	NZ_CP011634.1	179195..180055	Beta-lactam resistance	FJ197316
beta-lactam	blaTEM-168	99.77	861 / 861	NZ_CP022574.1	167855..168715	Beta-lactam resistance	FJ919776
beta-lactam	blaTEM-169	99.65	861 / 861	NZ_CP012993.2	106881..107741	Beta-lactam resistance	KP012538
beta-lactam	blaTEM-171	99.77	861 / 861	NZ_CP022574.1	167855..168715	Beta-lactam resistance	GQ149347
beta-lactam	blaTEM-176	99.88	861 / 861	NZ_CP011634.1	179195..180055	Beta-lactam resistance	GU550123
beta-lactam	blaTEM-181	99.77	861 / 861	NZ_CP022574.1	167855..168715	Beta-lactam resistance	KM977568
beta-lactam	blaTEM-182	99.65	861 / 861	NZ_CP012993.2	106881..107741	Beta-lactam resistance	HQ317449
beta-lactam	blaTEM-183	99.77	861 / 861	NZ_CP022574.1	167855..168715	Beta-lactam resistance	HQ529916
beta-lactam	blaTEM-185	99.3	861 / 861	NZ_CP018460.1	22987..23847	Beta-lactam resistance	JF795538
beta-lactam	blaTEM-186	99.88	861 / 861	NZ_CP011634.1	179195..180055	Beta-lactam resistance	JN227084
beta-lactam	blaTEM-19	99.3	861 / 861	NZ_CP018460.1	22987..23847	Beta-lactam resistance	JX042489
beta-lactam	blaTEM-191	99.3	861 / 861	NZ_CP018460.1	22987..23847	Beta-lactam resistance	KY432484
beta-lactam	blaTEM-196	99.77	861 / 861	NZ_CP012988.3	106881..107741	Beta-lactam resistance	JQ034306
beta-lactam	blaTEM-198	99.88	861 / 861	NZ_CP011634.1	179195..180055	Beta-lactam resistance	AB700703
beta-lactam	blaTEM-1A	100	861 / 861	NZ_CP021541.1	77352..78212	Beta-lactam resistance Alternate name; RblaTEM-1	HM749966
beta-lactam	blaTEM-1B	100	861 / 861	NC_022078.1	141593..142453	Beta-lactam resistance Alternate name; RblaTEM-1	AY458016
beta-lactam	blaTEM-1C	99.77	861 / 861	NZ_CP012988.3	106881..107741	Beta-lactam resistance Alternate name; RblaTEM-1	FJ560503
beta-lactam	blaTEM-20	99.54	861 / 861	NZ_CP016925.1	21214..22074	Beta-lactam resistance	EU527189
beta-lactam	blaTEM-201	99.77	861 / 861	NZ_CP012988.3	106881..107741	Beta-lactam resistance	JX310327
beta-lactam	blaTEM-206	99.88	861 / 861	NZ_CP011634.1	179195..180055	Beta-lactam resistance	KC783461
beta-lactam	blaTEM-207	99.88	861 / 861	NZ_CP011634.1	179195..180055	Beta-lactam resistance	KC818234
beta-lactam	blaTEM-208	99.88	861 / 861	NZ_CP011634.1	179195..180055	Beta-lactam resistance	KC865667
beta-lactam	blaTEM-209	99.77	861 / 861	NZ_CP012988.3	106881..107741	Beta-lactam resistance	KF240808
beta-lactam	blaTEM-210	99.77	861 / 861	NZ_CP012988.3	106881..107741	Beta-lactam resistance	KJ484630
beta-lactam	blaTEM-212	99.3	861 / 861	NZ_CP018460.1	22987..23847	Beta-lactam resistance	KF481968
beta-lactam	blaTEM-213	99.88	861 / 861	NZ_CP011634.1	179195..180055	Beta-lactam resistance	LJEE02000034
beta-lactam	blaTEM-214	99.88	861 / 861	NZ_CP011634.1	179195..180055	Beta-lactam resistance	KP050491
beta-lactam	blaTEM-215	99.88	861 / 861	NZ_CP011634.1	179195..180055	Beta-lactam resistance	KP050492
beta-lactam	blaTEM-216	99.77	861 / 861	NZ_CP012988.3	106881..107741	Beta-lactam resistance	KF944358
beta-lactam	blaTEM-217	99.88	861 / 861	NZ_CP011634.1	179195..180055	Beta-lactam resistance	HG934763
beta-lactam	blaTEM-219	99.65	861 / 861	NZ_CP021698.1	30823..31683	Beta-lactam resistance	KM114268
beta-lactam	blaTEM-220	99.77	861 / 861	NZ_CP012988.3	106881..107741	Warning: gene is missing from Notes file. Please inform curator.	KM998962
beta-lactam	blaTEM-226	99.65	861 / 861	NZ_CP012993.2	106881..107741	Warning: gene is missing from Notes file. Please inform curator.	KY646301
beta-lactam	blaTEM-230	99.77	861 / 861	NZ_CP012988.3	106881..107741	Warning: gene is missing from Notes file. Please inform curator.	MG821377
beta-lactam	blaTEM-231	99.77	861 / 861	NZ_CP022574.1	167855..168715	Warning: gene is missing from Notes file. Please inform curator.	MG821378
beta-lactam	blaTEM-232	99.77	861 / 861	NZ_CP012988.3	106881..107741	Warning: gene is missing from Notes file. Please inform curator.	MH079593
beta-lactam	blaTEM-234	99.88	861 / 861	NZ_CP011634.1	179195..180055	Warning: gene is missing from Notes file. Please inform curator.	MH243353
beta-lactam	blaTEM-26	99.42	861 / 861	NZ_CP011839.1	75018..75878	Beta-lactam resistance Alternate name; YOU-1	LDCJ01000052
beta-lactam	blaTEM-28	99.77	861 / 861	NZ_CP012988.3	106881..107741	Beta-lactam resistance	U37195
beta-lactam	blaTEM-29	99.77	861 / 861	NZ_CP012988.3	106881..107741	Beta-lactam resistance	DQ269440
beta-lactam	blaTEM-30	99.88	861 / 861	NZ_CP011634.1	179195..180055	Beta-lactam resistance Alternate name; blaTEM-30	AJ437107
beta-lactam	blaTEM-33	99.88	861 / 861	NZ_CP011634.1	179195..180055	Beta-lactam resistance Alternate name; IRT-5	GU371926
beta-lactam	blaTEM-34	99.88	861 / 861	NZ_CP011634.1	179195..180055	Beta-lactam resistance Alternate name; blaTEM-34	KC292503
beta-lactam	blaTEM-35	99.77	861 / 861	NZ_CP012988.3	106881..107741	Beta-lactam resistance Alternate name; IRT-4	KP860986
beta-lactam	blaTEM-36	99.77	861 / 861	NZ_CP012988.3	106881..107741	Beta-lactam resistance Alternate name; IRT-7	KY305958
beta-lactam	blaTEM-40	99.65	861 / 861	NZ_CP012993.2	106881..107741	Beta-lactam resistance Alternate name; IRT-167, IRT-11	FR717535
beta-lactam	blaTEM-43	99.54	861 / 861	NZ_CP016925.1	21214..22074	Beta-lactam resistance	U95363
beta-lactam	blaTEM-47	99.3	861 / 861	NZ_CP018460.1	22987..23847	Beta-lactam resistance	Y10279
beta-lactam	blaTEM-52	99.3	861 / 861	NZ_CP018460.1	22987..23847	Beta-lactam resistance	Y13612
beta-lactam	blaTEM-52B	99.65	861 / 861	NZ_CP012993.2	106881..107741	Beta-lactam resistance	AF027199
beta-lactam	blaTEM-54	99.77	861 / 861	NZ_CP022574.1	167855..168715	Beta-lactam resistance	AF104442
beta-lactam	blaTEM-55	99.77	861 / 861	NZ_CP012988.3	106881..107741	Beta-lactam resistance	DQ286729
beta-lactam	blaTEM-57	99.77	861 / 861	NZ_CP012988.3	106881..107741	Beta-lactam resistance	FJ405211
beta-lactam	blaTEM-6	99.42	861 / 861	NZ_CP011839.1	75018..75878	Beta-lactam resistance	X57972
beta-lactam	blaTEM-70	99.88	861 / 861	NZ_CP011634.1	179195..180055	Beta-lactam resistance	AF188199
beta-lactam	blaTEM-76	99.88	861 / 861	NZ_CP011634.1	179195..180055	Beta-lactam resistance Alternate name; IRT-20	AF190694
beta-lactam	blaTEM-77	99.77	861 / 861	NZ_CP012988.3	106881..107741	Beta-lactam resistance Alternate name; IRT-21	AF190695
beta-lactam	blaTEM-79	99.77	861 / 861	NZ_CP012988.3	106881..107741	Beta-lactam resistance	AF190692
beta-lactam	blaTEM-81	99.42	861 / 861	NZ_CP011839.1	75018..75878	Beta-lactam resistance	AF427127
beta-lactam	blaTEM-84	99.3	861 / 861	NZ_CP018460.1	22987..23847	Beta-lactam resistance	AF427130
beta-lactam	blaTEM-88	99.54	861 / 861	NZ_CP016925.1	21214..22074	Beta-lactam resistance	AY027590
beta-lactam	blaTEM-90	99.77	861 / 861	NZ_CP022574.1	167855..168715	Beta-lactam resistance Alternate name; TLE-1	AF351241
beta-lactam	blaTEM-93	99.3	861 / 861	NZ_CP018460.1	22987..23847	Beta-lactam resistance	AJ318093
beta-lactam	blaTEM-95	99.88	861 / 861	NZ_CP011634.1	179195..180055	Beta-lactam resistance	AJ308558
beta-lactam	blaVEB-3	100	900 / 900	NC_022078.1	152735..153634	Beta-lactam resistance	AY536519
quinolone	aac(6')-Ib-cr	99.49	587 / 600	NZ_CP011987.1	6728..7314	Fluoroquinolone and aminoglycoside resistance	DQ303918
quinolone	aac(6')-Ib-cr	100	519 / 519	NZ_CP012567.1	118283..118801	Fluoroquinolone and aminoglycoside resistance	EF636461
quinolone	qnrB1	100	645 / 645	NZ_CP009879.1	47659..48303	Warning: gene is missing from Notes file. Please inform curator.	DQ351241
quinolone	qnrB17	99.22	645 / 645	NZ_LN824135.1	76576..77220	Warning: gene is missing from Notes file. Please inform curator.	AM919398
quinolone	qnrB17	98.76	645 / 645	NZ_CP015502.1	98949..99593	Warning: gene is missing from Notes file. Please inform curator.	JN173051
quinolone	qnrB18	98.14	645 / 645	NZ_CP015383.1	18596..19240	Warning: gene is missing from Notes file. Please inform curator.	AM919399
quinolone	qnrB26	98.6	645 / 645	NZ_CP016925.1	38153..38797	Warning: gene is missing from Notes file. Please inform curator.	HQ386846
quinolone	qnrB3	99.07	645 / 645	NZ_CP012988.3	90158..90802	Warning: gene is missing from Notes file. Please inform curator.	DQ303920
quinolone	qnrB6	99.22	645 / 645	NZ_LN824135.1	76576..77220	Warning: gene is missing from Notes file. Please inform curator.	EF520349
quinolone	qnrB6	99.07	645 / 645	NZ_CP012988.3	90158..90802	Warning: gene is missing from Notes file. Please inform curator.	EF523819
quinolone	qnrB66	99.07	645 / 645	NZ_CP012988.3	90158..90802	Warning: gene is missing from Notes file. Please inform curator.	KC580655
quinolone	qnrB74	98.45	645 / 645	NZ_CP011839.1	45997..46641	Warning: gene is missing from Notes file. Please inform curator.	KJ415247
quinolone	qnrB75	98.76	645 / 645	NZ_CP015502.1	98949..99593	Warning: gene is missing from Notes file. Please inform curator.	KP207591
quinolone	qnrB77	98.91	645 / 645	NZ_CP012993.2	90158..90802	Warning: gene is missing from Notes file. Please inform curator.	KM985470
quinolone	qnrB9	99.69	645 / 645	NZ_CP021688.1	16840..17484	Warning: gene is missing from Notes file. Please inform curator.	EF526508
quinolone	qnrS1	100	657 / 657	NZ_CP010383.2	82471..83127	Warning: gene is missing from Notes file. Please inform curator.	AB187515
quinolone	qnrS2	90.26	657 / 657	NZ_CP021898.1	39029..39684	Warning: gene is missing from Notes file. Please inform curator.	DQ485530
quinolone	qnrS3	99.85	656 / 656	NZ_CP017386.1	149087..149742	Warning: gene is missing from Notes file. Please inform curator.	EU077611
quinolone	qnrS4	99.85	657 / 657	NZ_CP010385.1	41553..42209	Warning: gene is missing from Notes file. Please inform curator.	FJ418153
quinolone	qnrS5	96.19	656 / 657	NZ_CP011839.1	2335..2990	Warning: gene is missing from Notes file. Please inform curator.	HQ631377
quinolone	qnrS6	90.11	657 / 657	NZ_CP021946.1	73221..73876	Warning: gene is missing from Notes file. Please inform curator.	HQ631376
quinolone	qnrS7	99.85	657 / 657	NZ_CP010385.1	41553..42209	Warning: gene is missing from Notes file. Please inform curator.	KF730651
quinolone	qnrS8	99.85	657 / 657	NZ_CP010385.1	41553..42209	Warning: gene is missing from Notes file. Please inform curator.	KF730652
quinolone	qnrS9	99.85	657 / 657	NZ_CP010385.1	41553..42209	Warning: gene is missing from Notes file. Please inform curator.	KF732714
macrolide	mph(A)	100	906 / 906	NZ_CP007729.1	59410..60315	Macrolide resistance	D16251
macrolide	mph(A)	99.67	922 / 921	NZ_CP011977.1	23456..24377	Macrolide resistance	U36578
macrolide	mph(E)	100	885 / 885	NZ_CP012428.1	33582..34466	Macrolide resistance	DQ839391
macrolide	msr(E)	100	1476 / 1476	NZ_CP012428.1	34522..35997	Macrolide, Lincosamide and Streptogramin B resistance	FR751518
rifampicin	ARR-2	100	453 / 453	NZ_CP020842.1	100585..101037	Rifampicin resistance	HQ141279
rifampicin	ARR-3	100	453 / 453	NZ_CP012571.1	88264..88716	Rifampicin resistance	JF806499
rifampicin	ARR-6	99.78	453 / 453	NZ_CP012566.1	83301..83753	Rifampicin resistance	JF922883
trimethoprim	dfrA1	99.79	474 / 474	NZ_CP012566.1	83888..84361	Trimethoprim resistance	AB188271
trimethoprim	dfrA1	99.79	474 / 474	NZ_CP012566.1	83888..84361	Trimethoprim resistance	AB199789
trimethoprim	dfrA1	99.79	474 / 474	NZ_CP017935.1	60080..60553	Trimethoprim resistance	AF203818
trimethoprim	dfrA1	99.79	474 / 474	NZ_CP017935.1	60080..60553	Trimethoprim resistance	AJ238350
trimethoprim	dfrA1	99.79	474 / 474	NZ_CP012566.1	83888..84361	Trimethoprim resistance	AY141977
trimethoprim	dfrA1	99.58	474 / 474	NZ_CP011839.1	88987..89460	Trimethoprim resistance	DQ018382
trimethoprim	dfrA1	99.58	474 / 474	NZ_CP021741.1	63844..64317	Trimethoprim resistance	EU089668
trimethoprim	dfrA1	99.79	474 / 474	NZ_CP012566.1	83888..84361	Trimethoprim resistance	FJ001872
trimethoprim	dfrA1	99.58	474 / 474	NZ_CP021741.1	63844..64317	Trimethoprim resistance	FJ215857
trimethoprim	dfrA1	99.58	473 / 474	NZ_CP018365.1	43144..43616	Trimethoprim resistance	FJ489928
trimethoprim	dfrA1	99.79	474 / 474	NZ_CP012566.1	83888..84361	Trimethoprim resistance	FJ591049
trimethoprim	dfrA1	99.79	474 / 474	NZ_CP012566.1	83888..84361	Trimethoprim resistance	FM207631
trimethoprim	dfrA1	99.79	474 / 474	NZ_CP012566.1	83888..84361	Trimethoprim resistance	GU726913
trimethoprim	dfrA1	99.58	474 / 474	NZ_CP011839.1	88987..89460	Trimethoprim resistance	HM055363
trimethoprim	dfrA1	100	474 / 474	NZ_CP012571.1	87656..88129	Trimethoprim resistance	X00926
trimethoprim	dfrA12	99.6	498 / 498	NZ_CP011990.1	96023..96520	Trimethoprim resistance	AB196348
trimethoprim	dfrA12	100	498 / 498	NZ_CP007729.1	51059..51556	Trimethoprim resistance	AM040708
trimethoprim	dfrA12	99.6	498 / 498	NZ_CP011990.1	96023..96520	Trimethoprim resistance	AY551331
trimethoprim	dfrA12	99.8	498 / 498	NZ_CP008829.1	51059..51556	Trimethoprim resistance	DQ995286
trimethoprim	dfrA12	99.8	498 / 498	NZ_CP008829.1	51059..51556	Trimethoprim resistance	EU650399
trimethoprim	dfrA12	99.2	498 / 498	NC_022078.1	70357..70854	Trimethoprim resistance	FJ763641
trimethoprim	dfrA12	99.8	498 / 498	NZ_CP008829.1	51059..51556	Trimethoprim resistance	FM877486
trimethoprim	dfrA12	99.4	498 / 498	NZ_CP011977.1	15121..15618	Trimethoprim resistance	FR875302
trimethoprim	dfrA12	99.2	498 / 498	NC_022078.1	70357..70854	Trimethoprim resistance	KJ546436
trimethoprim	dfrA12	98.8	498 / 498	NZ_CP009777.1	1657..2154	Trimethoprim resistance	KJ568502
trimethoprim	dfrA14	99.79	474 / 474	NZ_LN824135.1	80512..80985	Trimethoprim resistance	AF393510
trimethoprim	dfrA14	99.59	483 / 483	NZ_CP012988.3	94085..94567	Trimethoprim resistance	DQ388123
trimethoprim	dfrA14	100	474 / 474	NZ_CP009879.1	51171..51644	Trimethoprim resistance	KF921535
trimethoprim	dfrA14	98.95	475 / 474	NZ_CP015502.1	95184..95657	Trimethoprim resistance	Z50804
trimethoprim	dfrA14	99.37	474 / 474	NZ_CP012993.2	94094..94567	Trimethoprim resistance	Z50805
sulphonamide	sul1	99.4	840 / 840	NZ_CP018434.1	12060..12899	Sulphonamide resistance	AF188331
sulphonamide	sul1	99.17	840 / 840	NZ_CP021834.1	142074..142913	Sulphonamide resistance	AJ517791
sulphonamide	sul1	99.88	840 / 840	NZ_CP008829.1	53260..54099	Sulphonamide resistance	AJ564903
sulphonamide	sul1	99.88	840 / 840	NZ_CP008829.1	53260..54099	Sulphonamide resistance	AJ746361
sulphonamide	sul1	99.76	840 / 840	NZ_CP018365.1	44661..45500	Sulphonamide resistance	AJ971344
sulphonamide	sul1	99.88	840 / 840	NZ_CP008829.1	53260..54099	Sulphonamide resistance	AM040449
sulphonamide	sul1	99.88	840 / 840	NZ_CP008829.1	53260..54099	Sulphonamide resistance	AM746675
sulphonamide	sul1	99.76	840 / 840	NZ_CP010393.1	11379..12218	Sulphonamide resistance	AY115475
sulphonamide	sul1	99.88	840 / 840	NZ_CP008829.1	53260..54099	Sulphonamide resistance	AY260546
sulphonamide	sul1	99.88	829 / 828	NZ_CP009777.1	3858..4686	Sulphonamide resistance	AY522923
sulphonamide	sul1	99.88	840 / 840	NZ_CP008829.1	53260..54099	Sulphonamide resistance	AY524415
sulphonamide	sul1	99.88	840 / 840	NZ_CP008829.1	53260..54099	Sulphonamide resistance	AY878717
sulphonamide	sul1	99.88	840 / 840	NZ_CP008829.1	53260..54099	Sulphonamide resistance	DQ125241
sulphonamide	sul1	99.88	831 / 831	NC_022078.1	72567..73397	Sulphonamide resistance	DQ143913
sulphonamide	sul1	100	819 / 882	NZ_CP016810.1	50211..51029	Sulphonamide resistance	DQ914960
sulphonamide	sul1	99.64	840 / 840	NZ_CP021544.1	51797..52636	Sulphonamide resistance	EF592571
sulphonamide	sul1	99.88	840 / 840	NZ_CP008829.1	53260..54099	Sulphonamide resistance	EF667294
sulphonamide	sul1	99.88	840 / 840	NZ_CP008829.1	53260..54099	Sulphonamide resistance	EU117158
sulphonamide	sul1	99.88	867 / 867	NZ_CP011990.1	98197..99063	Sulphonamide resistance	EU780013
sulphonamide	sul1	99.88	840 / 840	NZ_CP008829.1	53260..54099	Sulphonamide resistance	EU855787
sulphonamide	sul1	99.76	840 / 840	NZ_CP011634.1	71314..72153	Sulphonamide resistance	FJ715937
sulphonamide	sul1	99.88	840 / 840	NZ_CP008829.1	53260..54099	Sulphonamide resistance	GU562437
sulphonamide	sul1	99.88	840 / 840	NZ_CP008829.1	53260..54099	Sulphonamide resistance	JF262165
sulphonamide	sul1	99.88	840 / 840	NZ_CP008829.1	53260..54099	Sulphonamide resistance	JF262178
sulphonamide	sul1	99.88	837 / 837	NZ_CP011977.1	17325..18161	Sulphonamide resistance	JN581942
sulphonamide	sul1	99.76	840 / 840	NZ_CP017935.1	61942..62781	Sulphonamide resistance	JN790946
sulphonamide	sul1	100	840 / 840	NZ_CP007729.1	53260..54099	Sulphonamide resistance	U12338
sulphonamide	sul1	99.88	840 / 840	NZ_CP008829.1	53260..54099	Sulphonamide resistance	X15024
sulphonamide	sul2	99.51	816 / 816	NZ_CP021688.1	74765..75580	Sulphonamide resistance	AB366440
sulphonamide	sul2	99.88	816 / 816	NZ_CP012993.2	110162..110977	Sulphonamide resistance	AF497970
sulphonamide	sul2	99.63	816 / 816	NZ_CP018460.1	26268..27083	Sulphonamide resistance	AF542061
sulphonamide	sul2	99.75	816 / 816	NZ_CP016925.1	17978..18793	Sulphonamide resistance	AJ289135
sulphonamide	sul2	99.88	816 / 816	NZ_CP012993.2	110162..110977	Sulphonamide resistance	AJ319822
sulphonamide	sul2	99.88	816 / 816	NZ_CP012993.2	110162..110977	Sulphonamide resistance	AJ830710
sulphonamide	sul2	99.88	816 / 816	NZ_CP012993.2	110162..110977	Sulphonamide resistance	AJ830714
sulphonamide	sul2	100	816 / 816	NZ_CP012988.3	110162..110977	Sulphonamide resistance	AY034138
sulphonamide	sul2	99.88	816 / 816	NZ_CP012993.2	110162..110977	Sulphonamide resistance	AY232670
sulphonamide	sul2	99.02	816 / 816	NZ_CP021698.1	26362..27177	Sulphonamide resistance	AY524415
sulphonamide	sul2	99.88	816 / 816	NZ_CP012993.2	110162..110977	Sulphonamide resistance	FJ968160
sulphonamide	sul2	99.75	816 / 816	NZ_CP016925.1	17978..18793	Sulphonamide resistance	FN995456
sulphonamide	sul2	99.63	816 / 816	NZ_CP018460.1	26268..27083	Sulphonamide resistance	HQ840942
sulphonamide	sul2	99.88	816 / 816	NZ_CP012993.2	110162..110977	Sulphonamide resistance	U57647
