# Supplementary material for: Genetic determinants facilitating the evolution of resistance to carbapenem antibiotics
Source: eLife journal article supplement (doi:10.7554/elife.67310), 2021-04-19
Supplement: supp [file elife-67310-supp-v1.zip › elife_poa_e67310_Supplementary_file_9.xlsx]

## Sheet: Supplementary file 9
Supplementary file 9. Numbers of mutants with mutations (SNP/Short INDEL vs. TN insertion) in ompK36.
Strain	Experiment 1		Experiment 2		Experiment 3		Total numbers of mutants with mutations in ompK36
	No. of mutants with TN insertion in ompK36	No. of mutants with SNP/Short INDEL in ompK36	No. of mutants with TN insertion in ompK36	No. of mutants with SNP/Short INDEL in ompK36	No. of mutants with TN insertion in ompK36	No. of mutants with SNP/Short INDEL in ompK36
UCI38 (ST258)	22	4	20	3	21	5	75
MGH222 (ST15)	20	4	16	2	16	2	60
UCICRE126 (ST147)	10	7	11	7	13	8	56
MGH66 (ST29)	23	4	20	2	20	3	72
BIDMC41 (ST37)	22	5	18	4	22	6	77
MGH74 (ST76)	1	38	0	24	1	26	90
MGH158 (ST152)	0	30	0	25	0	35	90
UCI64 (ST17)	2	24	2	20	5	20	73
UCI34 (ST34)	0	21	0	30	0	33	84
MGH21 (ST111)	0	20	0	20	0	52	92
UCI43 (ST258)	13	2	16	4	14	2	51
UCI22 (ST258)	16	2	15	1	15	1	50
UCI44 (ST258)	15	2	22	2	18	2	61
MGH32 (ST111)	0	22	0	25	0	30	77
MGH30 (ST37)	0	24	0	24	0	52	100
BIDMC40 (ST34)	1	20	2	30	3	34	90
