# Supplementary material for: Genetic determinants facilitating the evolution of resistance to carbapenem antibiotics
Source: eLife journal article supplement (doi:10.7554/elife.67310), 2021-04-19
Supplement: supp [file elife-67310-supp-v1.zip › elife_poa_e67310_Supplementary_file_10.xlsx]

## Sheet: Supplementary file 10
Supplementary file 10. ISs involved in inactivating ompK36 in UCI38
Mutations/INDEL in ompK36 locus	IS Family	No. of mutants of UCI38	Percentage (%) of total 84 mutants
insAB	IS1	24	28.5714
Transposase Zinc Binding protein	IS91	24	28.5714
InsH8 transposase, IS5 family transposase	IS5	12	14.2857
IS4 family transposase	IS4	3	3.57143
Deletions		6	7.14286
Point mutations		6	7.14286
No mutation identified in ompK36		9	10.7143
Total		84
