# Supplementary material for: Genetic determinants facilitating the evolution of resistance to carbapenem antibiotics
Source: eLife journal article supplement (doi:10.7554/elife.67310), 2021-04-19
Supplement: supp [file elife-67310-supp-v1.zip › elife_poa_e67310_Supplementary_file_11.xlsx]

## Sheet: Supplementary file 11
Supplementary file 11. MICs and fold changes of MICs measured from 90 mutants
Mutant ID	Ancestor	MIC (µg/mL) of			Fold change of MICs against ancestor strains
		ETP	FAR	MEM	ETP	MEM
Mut31	UCI38	1	4	0.03	4	0.5
Mut36	UCI38	2	4	0.03	8	0.5
Mut40	UCI38	2	4	0.03	8	0.5
Mut42	UCI38	2	4	0.03	8	0.5
Mut44	UCI38	0.5	4	0.03	2	0.5
Mut99	UCI38	1	4	0.03	4	0.5
Mut161	UCI38	0.5	8	0.03	2	0.5
Mut18	MGH21	0.13	1	0.03	4.33333	1
Mut19	MGH21	0.13	1	0.03	4.33333	1
Mut29	UCI38	2	8	0.06	8	1
Mut30	UCI38	2	4	0.06	8	1
Mut32	UCI38	1	4	0.06	4	1
Mut34	UCI38	2	4	0.06	8	1
Mut35	UCI38	4	4	0.06	16	1
Mut37	UCI38	2	4	0.06	8	1
Mut38	UCI38	2	4	0.06	8	1
Mut86	MGH21	0.06	1	0.03	2	1
Mut94	MGH21	0.13	1	0.03	4.33333	1
Mut96	MGH21	0.06	1	0.03	2	1
Mut101	UCI38	2	4	0.06	8	1
Mut126	MGH21	0.25	1	0.03	8.33333	1
Mut129	MGH21	0.13	1	0.03	4.33333	1
Mut131	MGH21	8	1	0.03	266.667	1
Mut134	MGH21	0.13	1	0.03	4.33333	1
Mut137	MGH21	0.06	1	0.03	2	1
Mut138	MGH21	0.06	1	0.03	2	1
Mut139	MGH21	0.13	1	0.03	4.33333	1
Mut20	MGH21	0.13	1	0.06	4.33333	2
Mut21	MGH21	0.25	1	0.06	8.33333	2
Mut93	MGH21	0.13	1	0.06	4.33333	2
Mut95	MGH21	0.13	1	0.06	4.33333	2
Mut127	MGH21	0.25	1	0.06	8.33333	2
Mut128	MGH21	0.25	1	0.06	8.33333	2
Mut130	MGH21	0.25	1	0.06	8.33333	2
Mut132	MGH21	0.25	1	0.06	8.33333	2
Mut133	MGH21	0.25	1	0.06	8.33333	2
Mut98	UCI38	1	4	0.13	4	2.16667
Mut39	UCI38	4	4	0.25	16	4.16667
Mut43	UCI38	8	4	0.25	32	4.16667
Mut100	UCI38	4	4	0.25	16	4.16667
Mut109	UCI38	16	8	0.25	64	4.16667
Mut160	UCI38	8	8	0.25	32	4.16667
Mut177	UCI38	16	8	0.25	64	4.16667
Mut41	UCI38	16	8	0.5	64	8.33333
Mut46	UCI38	16	8	0.5	64	8.33333
Mut47	UCI38	16	8	0.5	64	8.33333
Mut48	UCI38	16	8	0.5	64	8.33333
Mut50	UCI38	8	8	0.5	32	8.33333
Mut51	UCI38	8	8	0.5	32	8.33333
Mut97	UCI38	8	8	0.5	32	8.33333
Mut106	UCI38	16	8	0.5	64	8.33333
Mut125	UCI38	32	8	0.5	128	8.33333
Mut135	MGH21	0.5	1	0.25	16.6667	8.33333
Mut136	MGH21	2	1	0.25	66.6667	8.33333
Mut140	MGH21	0.5	1	0.25	16.6667	8.33333
Mut141	MGH21	0.25	1	0.25	8.33333	8.33333
Mut158	UCI38	16	8	0.5	64	8.33333
Mut173	UCI38	32	8	0.5	128	8.33333
Mut176	UCI38	8	8	0.5	32	8.33333
Mut33	UCI38	16	8	1	64	16.6667
Mut45	UCI38	16	8	1	64	16.6667
Mut49	UCI38	16	8	1	64	16.6667
Mut102	UCI38	32	8	1	128	16.6667
Mut103	UCI38	32	8	1	128	16.6667
Mut105	UCI38	32	8	1	128	16.6667
Mut107	UCI38	16	8	1	64	16.6667
Mut108	UCI38	16	8	1	64	16.6667
Mut110	UCI38	32	8	1	128	16.6667
Mut111	UCI38	32	8	1	128	16.6667
Mut112	UCI38	32	8	1	128	16.6667
Mut113	UCI38	32	8	1	128	16.6667
Mut114	UCI38	32	8	1	128	16.6667
Mut115	UCI38	32	8	1	128	16.6667
Mut116	UCI38	32	8	1	128	16.6667
Mut117	UCI38	32	8	1	128	16.6667
Mut118	UCI38	32	8	1	128	16.6667
Mut119	UCI38	32	8	1	128	16.6667
Mut120	UCI38	32	8	1	128	16.6667
Mut121	UCI38	32	8	1	128	16.6667
Mut123	UCI38	32	8	1	128	16.6667
Mut124	UCI38	32	8	1	128	16.6667
Mut159	UCI38	16	8	1	64	16.6667
Mut174	UCI38	32	8	1	128	16.6667
Mut175	UCI38	16	8	1	64	16.6667
Mut179	UCI38	16	8	1	64	16.6667
Mut180	UCI38	32	8	1	128	16.6667
Mut184	UCI38	16	8	1	64	16.6667
Mut104	UCI38	32	8	2	128	33.3333
Mut122	UCI38	32	8	2	128	33.3333
Mut183	UCI38	32	8	2	128	33.3333
