# Supplementary material for: Genetic determinants facilitating the evolution of resistance to carbapenem antibiotics
Source: eLife journal article supplement (doi:10.7554/elife.67310), 2021-04-19
Supplement: supp [file elife-67310-supp-v1.zip › elife_poa_e67310_Supplementary_file_12.xlsx]

## Sheet: Supplementary file 12
Supplementary file 12. Validation of mutations causing decreased susceptibility
Mutant ID	Ancestor	Drug evolved from	MIC (µg/ml) (Fold changes) of			Mutations caused descreased susceptibility			SNP/INDEL	Other mutations	Validation method	Construct	MIC (µg/ml) (Fold changes) of (against validation strains)
			Ertapenem	Meropenem	Faropenem	β-lactamases genes	Porin genes	Other genes					Ertapenem	Meropenem	Faropenem
Mut87	MGH21	Faropenem	0.06 (2)	<=0.03 (1)	2 (4)			Wzc (L378_RS17485)	c.381delA	NA	Expressing wild-type wzc with native promoter in Mut87	pSmart_wzc	<=0.03 (1)	<=0.03 (1)	0.5 (1)
Mut86	MGH21	Faropenem	0.06 (2)	<=0.03 (1)	2 (4)		ompA (L367_001084)		p.G31D	ntrB (L367_004366), p.G175A	Expressing wild-type ompA with native promoter in Mut86	pSmart_ompA	<=0.03 (1)	<=0.03 (1)	0.5 (1)
											Expressing wild-type ntrB with native promoter in Mut86	pSmart_ntrB	0.06 (2)	<=0.03 (1)	2 (4)
Mut131	MGH21	Ertapenem	8 (256)	<=0.03 (1)	8 (16)		ompK36 (L367_002817)		c.332_333insTACGACCGTAGT	NA	Expressing wild-type ompK36 with native promoter in Mut131	pSmart_ompK36MGH21	<=0.03 (1)	<=0.03 (1)	0.5 (1)
Mut101	UCI38	Faropenem	2 (8)	0.06 (1)	4 (2)			rseA (P841_001338)	rseA::IS1	NA	Expressing wild-type rseA with pBAD promoter in Mut101	pBAD33Gm_rseA	0.5 (2)	0.06 (1)	2 (1)
Mut34	UCI38	Ertapenem	2 (8)	0.06 (1)	4 (2)	blaSHV-12 (P841_005417)			blaSHV-12dup[2]	tatD (P841_003146) :: IS1	Expressing wild-type tatD with native promoter in Mut34	pSmart_tatD	2 (8)	0.06 (1)	4 (2)
Mut21	MGH21	Ertapenem	0.25 (8)	0.06 (2)	1 (2)			bamD (L367_003146)	c.-4C>T	XRE family transcriptional Regulator (L367_000624), c.596delC; fepD (L367_000691), p. S27R	Expressing bamD with original native promoter region in Mut21	pSmart_bamD	<=0.03 (1)	<=0.03 (1)	0.5 (1)
											Expressing wild-type xre regulatior gene with native promoter in Mut21	pSmart_xre	0.25 (8)	0.06 (2)	1 (2)
											Expressing wild-type fepD gene with native promoter in Mut21	pSmart_fepD	0.25 (8)	0.06 (2)	1 (2)
Mut136	MGH21	Ertapenem	2 (64)	0.25 (8)	4 (8)		ompK36 (L367_002817)		p.Q311STP	hypothetical protein (L367_000635), c.144_145insA	Expressing wild-type ompK36 with native promoter in Mut136	pSmart_ompK36	<=0.03 (1)	<=0.03 (1)	0.5 (1)
Mut41	UCI38	Ertapenem	16 (64)	0.5 (8)	8 (4)		ompK36 (P841_001022)		ompK36::IS1	NA	Expressing wild-type ompK36 with native promoter in Mut41	pSmart_ompK36UCI38	0.25 (1)	0.06 (1)	2 (1)
Mut107	UCI38	Ertapenem	16 (64)	1 (16)	16 (8)		ompK36 (P841_001022)		ompK36::IS5	NA	Expressing wild-type ompK36 with native promoter in Mut117	pSmart_ompK36UCI38	0.25 (1)	0.06 (1)	2 (1)
Mut45	UCI38	Meropenem	16 (64)	1 (16)	8 (4)		ompK36 (P841_001022)		ompK36::IS91	glycosyltransferase (P841_000223) c.333C>A	Expressing wild-type ompK36 with native promoter in Mut45	pSmart_ompK36UCI38	1 (4)	0.06 (1)	4 (2)
