# Supplementary material for: Genetic determinants facilitating the evolution of resistance to carbapenem antibiotics
Source: eLife journal article supplement (doi:10.7554/elife.67310), 2021-04-19
Supplement: supp [file elife-67310-supp-v1.zip › elife_poa_e67310_Supplementary_file_13.xlsx]

## Sheet: Supplementary file 13
Supplementary file 13. Primers used in this study
Primers	Sequences	Description
Shv12F	CACCAGTTCCTCCCGGGATGGCA	blaSHV-12 from UCI38 including upstream 500bp, forward
Shv12R	TTA GCG TTG CCA GTG CTC GAT CA	blaSHV-12 from UCI38 including upstream 500bp, reverse
ompK36F-seq	GGCCTAATTGATTGATTAATAGTCGTTAG	Sanger sequencing primers for ompK36, conserved among strains tested.
ompK36R-seq	CAT ATC CAT TAA TCG AGG CTC CTC TT	Sanger sequencing primers for ompK36, conserved among strains tested.
ompK36qF	CGGTAAAATTGACGGTCTGC	RT-qPCR primer for ompK36, from conserved region of K. pneumoniae
omp36KqR	ATCGCTGGAGCTTTCAGTGT	RT-qPCR primer for ompK36, from conserved region of K. pneumoniae
kleb p. 16s	CGGACGGGTGAGTAATGTCT	RT-qPCR primer for 16s rRNA, from conserved region of K. pneumoniae
kleb p 16s R	CTCAGACCAGCTAGGGATCG	RT-qPCR primer for 16s rRNA, from conserved region of K. pneumoniae
SHVQF	CTTTCCCATGATGAGCACCT	RT-qPCR primer for blaSHV, from conserved region of blaSHV
SHVQR	AGATCCTGCTGGCGATAGTG	RT-qPCR primer for blaSHV, from conserved region of blaSHV
Cas21KOUpF	atcgatggatccatcgCAGCAAATCGACGGTGGTGA	upstream 1000 bp of Cas3 in MGH21 for knockout, with BamHi
Cas21KOUpR	TAT GGC AAT CGT GTG GAT GGA TGATCAAGCGCCTCATGGAATT	upstream 1000 bp of Cas3 in MGH21 for knockout
Cas21KODownF	TCC ATC CAC ACG ATT GCC ATA CTGTCGTAATACGTGGATATTGTG	Downstream 1000 bo of Cas2 in MGH21 for knockout
Cas21KODownR	atcgatGCGGCCGCatcgTAGAAACACCTCCACGTGCGTG	Downstream 1000 bo of Cas2 in MGH21 for knockout, with NotI
CasAup	ATGCATGGTACCGCTAGCAGGAGGAATTCACCATGGAGAACCGCTTCAATTTGA	CasABECD operon, upstream, with KpnI, SD sequences and ATG
Cas21newR	GACCGCCTGTAGGATGTGTT	Cas operon downstream, including CRISPR array I with XbaI.
Cas3newF	TCACCCACGATCAGAATGAA	upstream primer for cas3 , including crispr array II
Cas3newR	GCT AGC GCT TTG TCT GCA TCA	downstream primer for cas3 operon
