# Supplementary figures and images for: Genetic determinants facilitating the evolution of resistance to carbapenem antibiotics
Source: eLife journal article supplement (doi:10.7554/elife.67310), 2021-04-19

Figure 5-figure supplement 3

Log10 fold changes of conjugation  
efficiency comparing to UCI38

No MEM

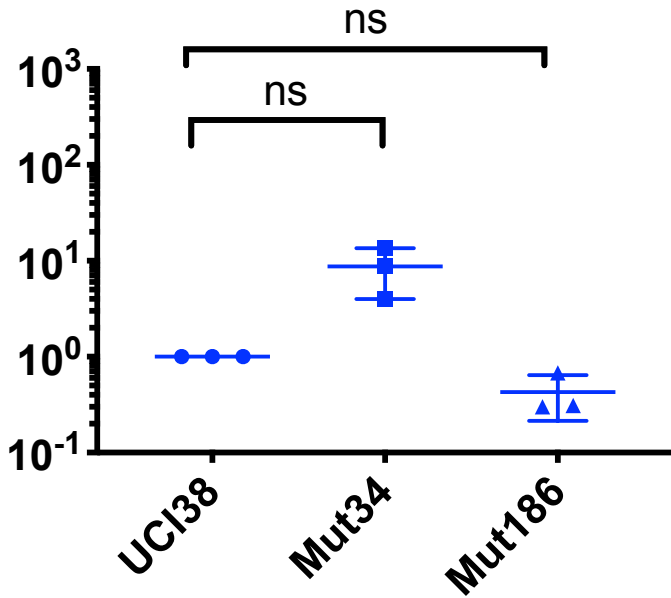

Supplement: supp [file elife-67310-supp-v1.zip]

Figure 5-figure supplement 2

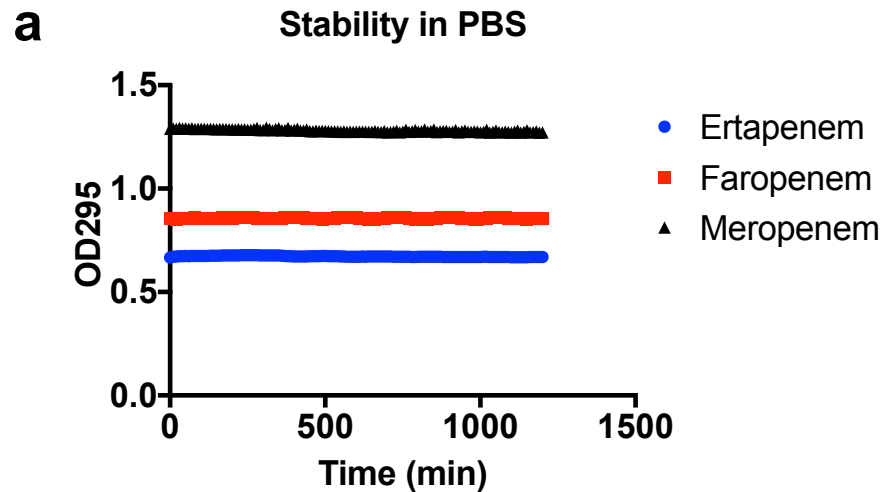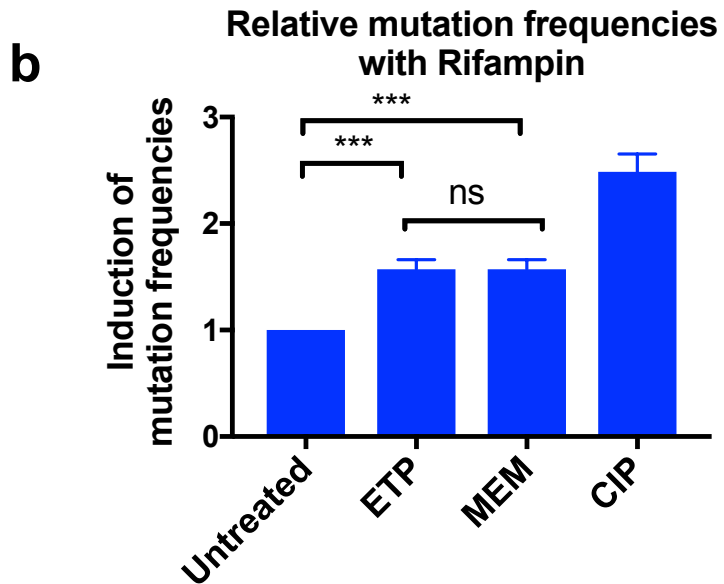

Supplement: supp [file elife-67310-supp-v1.zip]

## No antibiotics

Figure 4-figure supplement 4

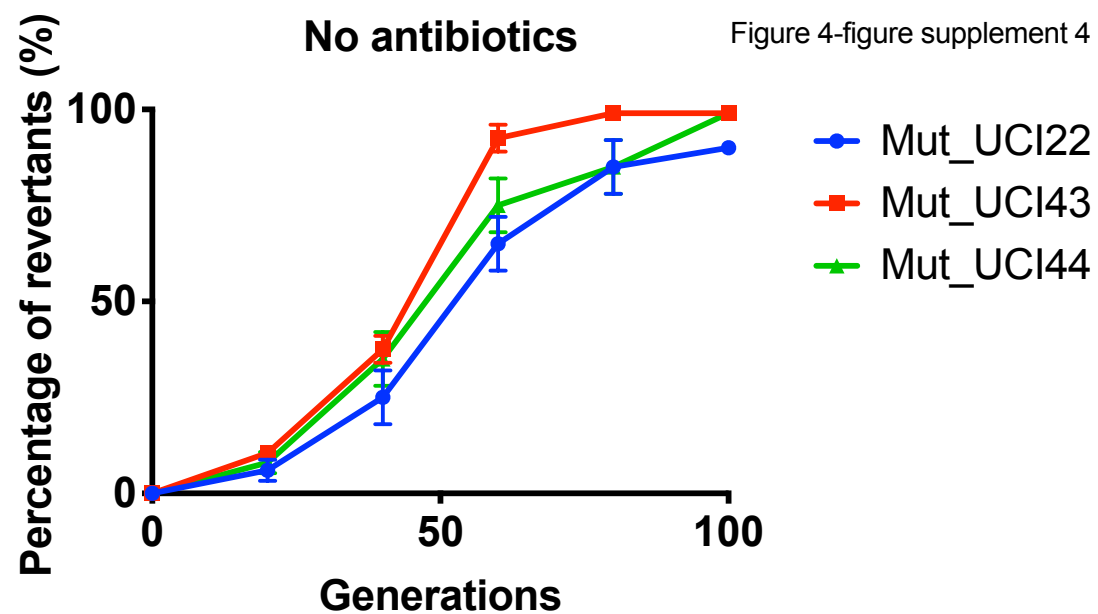

Supplement: supp [file elife-67310-supp-v1.zip]

Figure 3-figure supplement 1

Type I-E CRISPR-Cas system in MGH21

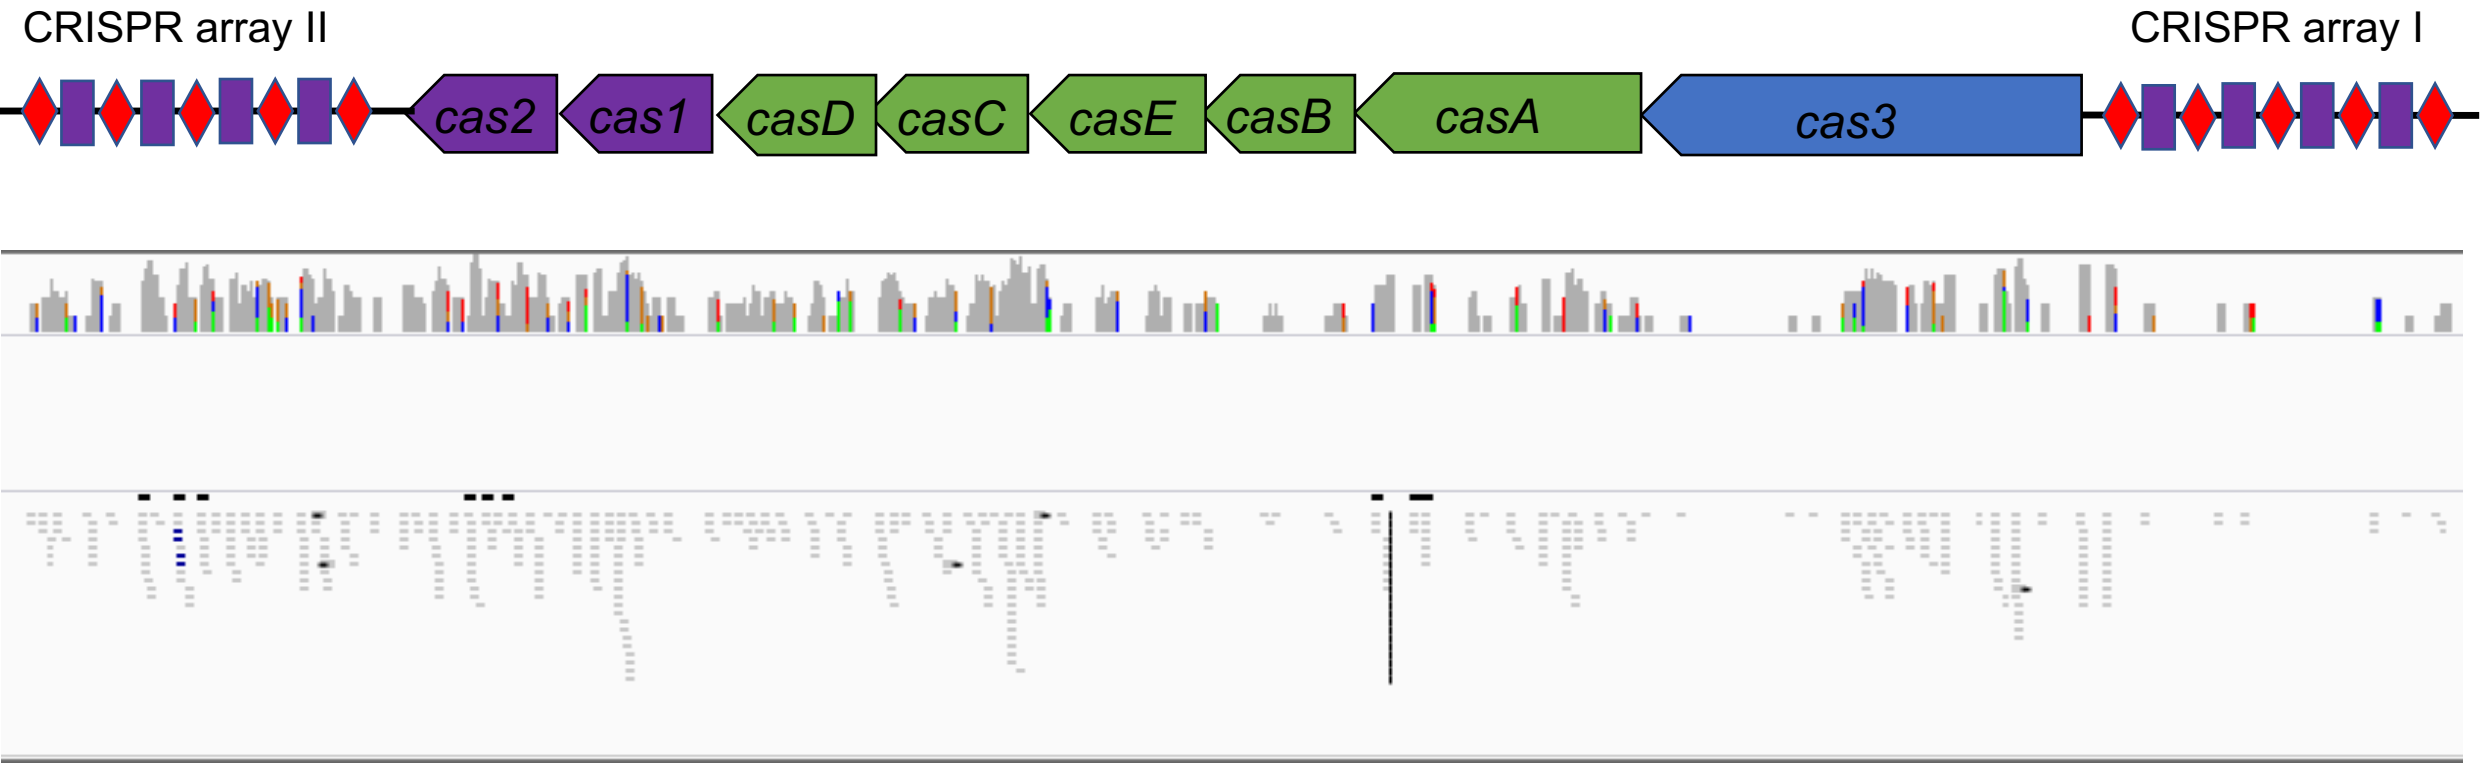

Supplement: supp [file elife-67310-supp-v1.zip]

Figure 5-figure supplement 1  
**UCI22 (ST258)**

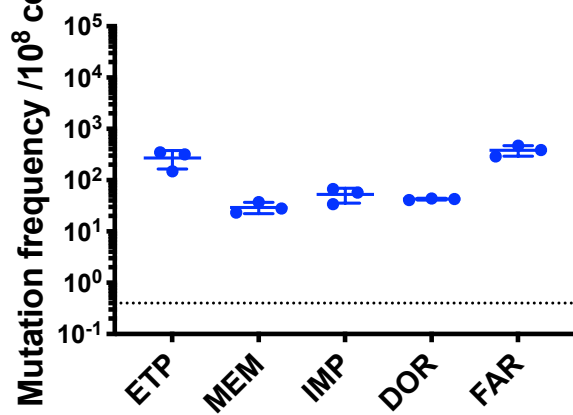

**BIDMC41 (ST37)**

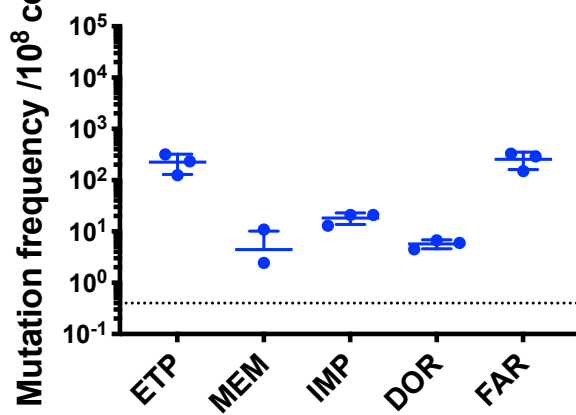

**UCI64 (ST17)**

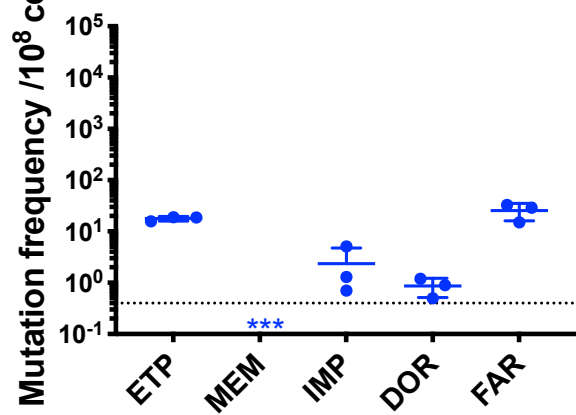

Supplement: supp [file elife-67310-supp-v1.zip]

***ompK36***

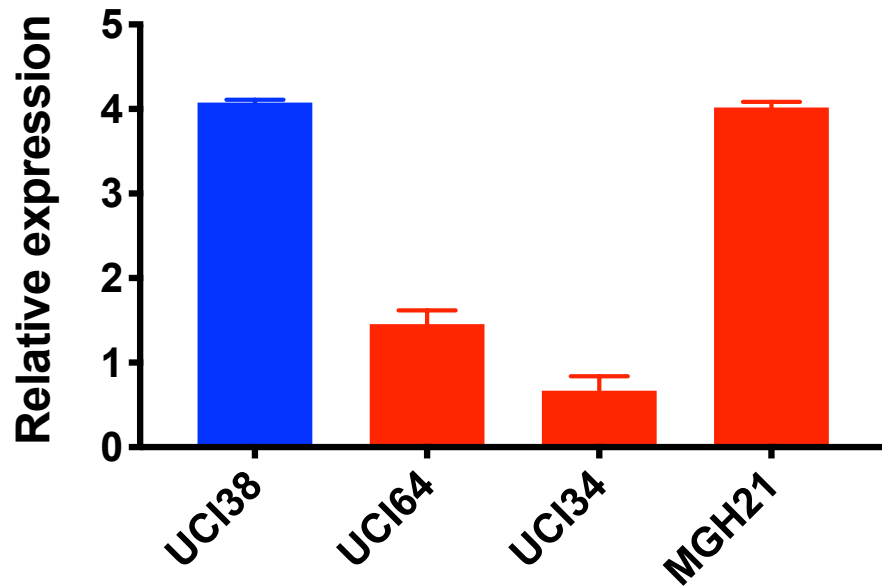

***ompK35***

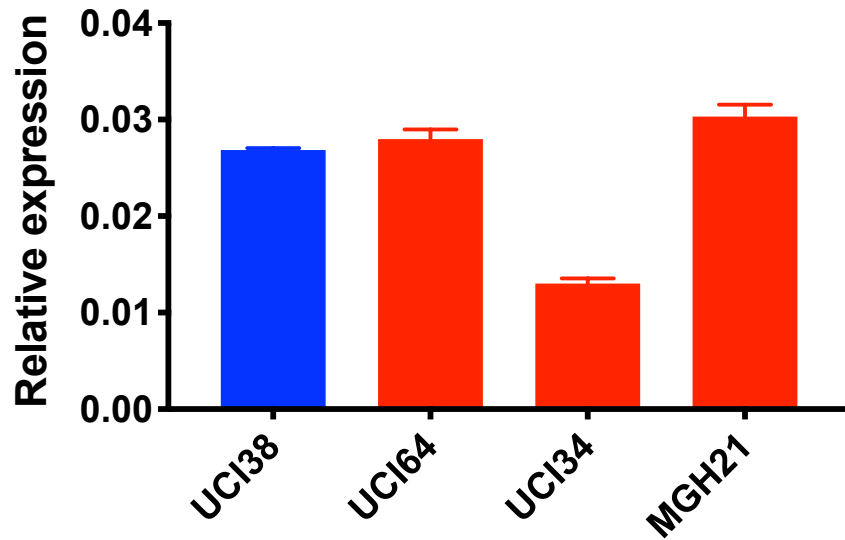

Supplement: supp [file elife-67310-supp-v1.zip]

Figure 4-figure supplement 3

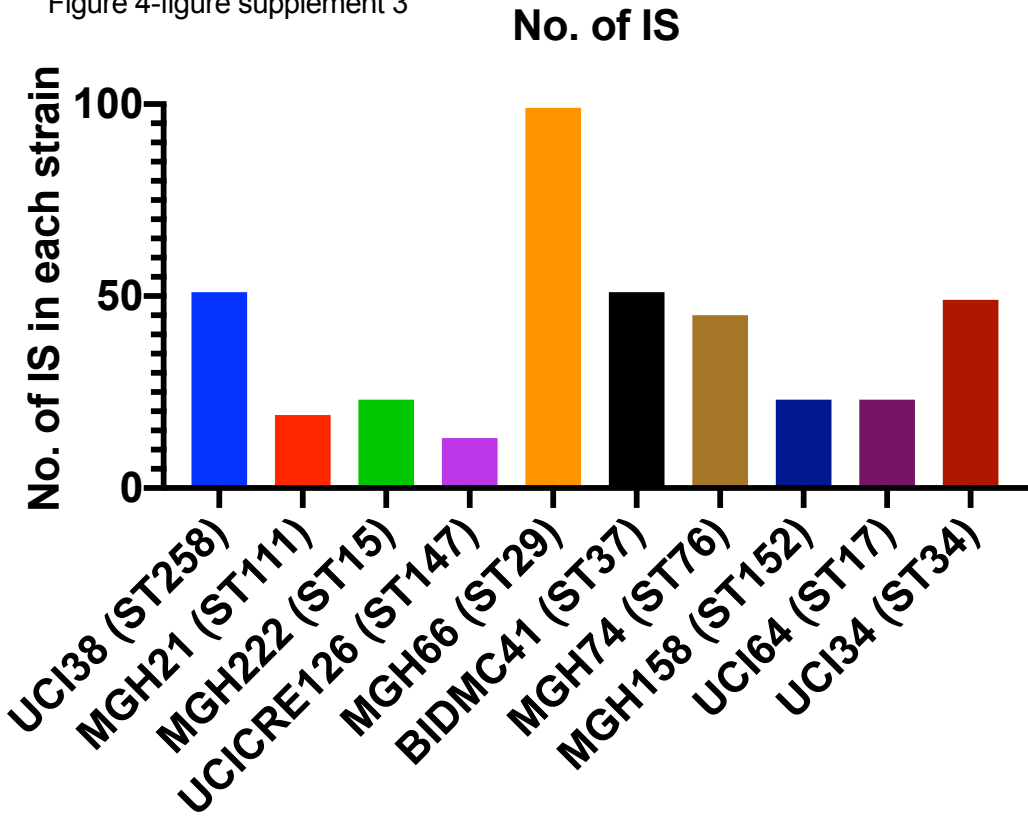

Supplement: supp [file elife-67310-supp-v1.zip]

Figure 2-figure supplement 1

*bla*<sub>SHV-12</sub>

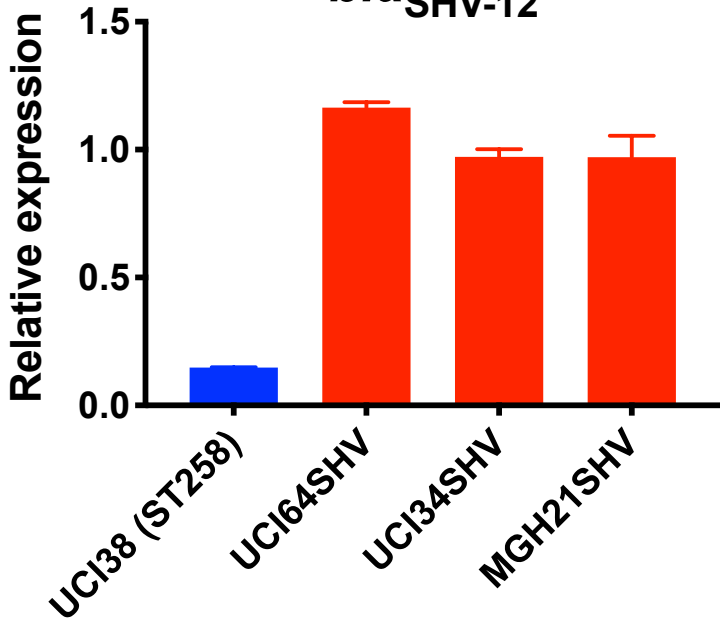

Supplement: supp [file elife-67310-supp-v1.zip › elife_poa_e67310_Figure_2_figure_supplement_1.pdf]
